# Supplementary material
Source: Royal Society of Chemistry journal article supplement (doi:10.1039/d6ob00392c)

## SUPPORTING INFORMATION

### **Stereocontrolled Spirocyclization of *exo*-Glycals with Arylamines for the Synthesis of (1*S*)-Spiro- Tetrahydroquinoline Glycosides**

Po-Yen Chen, Yi-Ting Chiang, Chun-Hung Lin, Min-Tsang Hsieh,\* and Hui-Chang Lin\*

# Contents

|                                                                                   |     |
|-----------------------------------------------------------------------------------|-----|
| <b>Experimental Section</b> .....                                                 |     |
| <b>General Information of reagents and instrumentation:</b> .....                 | S3  |
| <b>Experimental Procedures and Spectroscopic Characterization Data</b> .....      | S3  |
| Typical Procedure for Synthesis of <i>C,O</i> -glycosides <b>3a-3r</b> .....      | S3  |
| Spectroscopic Characterization Data of <b>3a-3r</b> .....                         | S4  |
| Typical Procedure for Synthesis of Spiro[pyran-2,4'-quinoline] <b>4a-4y</b> ..... | S17 |
| Spectroscopic Characterization Data of <b>4a-4y</b> .....                         | S17 |
| Typical Procedure for Synthesis of deprotection compounds <b>5a-5e</b> .....      | S36 |
| Spectroscopic Characterization Data of <b>5a-5e</b> .....                         | S36 |
| Typical Procedure for Synthesis of side products <b>3a-I, 3a-II</b> .....         | S39 |
| Spectroscopic Characterization Data of <b>3a-I, 3a-II</b> .....                   | S40 |
| Reference S1.....                                                                 | S41 |
| <b>NMR Spectra</b> .....                                                          |     |
| <sup>1</sup> H and <sup>13</sup> C NMR spectra of <b>3a-3r</b> .....              | S42 |
| 2D NMR Spectra of <b>3a</b> .....                                                 | S43 |
| <sup>1</sup> H and <sup>13</sup> C NMR spectra of <b>4a-4y</b> .....              | S61 |
| 2D NMR spectra of <b>4a</b> .....                                                 | S62 |
| <sup>1</sup> H and <sup>13</sup> C NMR spectra of <b>5a-5e</b> .....              | S87 |
| 2D NMR spectra of <b>5a</b> .....                                                 | S88 |

## Experimental Section

### General Information of reagents and instrumentation:

All purchased chemicals were of reagent grade. All reactions were carried out under a nitrogen atmosphere and monitored by TLC analysis (layer thickness: 250  $\mu\text{m}$ ). Column chromatography was carried out with silica gel 60 (70–230 mesh for gravity column, or 230–400 mesh for flash column). Commercially available reagents were directly used without purification unless otherwise noted. Dichloromethane, 1,2-dichloroethane, ethyl acetate, and hexanes were purchased. Proton NMR spectra were recorded at a Bruker spectrometer (400 or 500 MHz) with  $\text{CDCl}_3$  ( $\delta_{\text{H}}$  7.24) and  $\text{Water-}d_2$  ( $\delta_{\text{H}}$  4.65) as the internal standard; Carbon-13 NMR spectra were recorded at 100 or 125 MHz with  $\text{CDCl}_3$  [ $\delta_{\text{C}}$  77.0 (central line of a triplet)] and  $\text{Water-}d_2$ . Splitting patterns were shown by abbreviations, such as s (singlet), d (doublet), t (triplet), q (quartet), and m (multiplet). High-resolution mass spectra (HRMS) were a Matrix-assisted laser desorption/ionization time-of-flight (MALDI-TOF) mass spectrometer or an electron ionization time-of-flight (EI-TOF) mass spectrometer.

### Experimental Procedures and Spectroscopic Characterization Data.

#### Typical Procedure for Synthesis of *C,O*-glycosides **3a-3r**.

To a solution of *exo*-glycals **1** (0.09 mmol), arylamines (0.11 mmol) and acetic acid (0.68 mmol) in dichloroethane (DCE) (2.0 mL) was added  $\text{ZnCl}_2$  (0.14 mmol). The reaction mixture was stirred at 55  $^{\circ}\text{C}$  under  $\text{N}_2$  for 8 h. After the reaction was complete,  $\text{CH}_2\text{Cl}_2$  (50 mL) was added to the reaction mixture, washed twice with  $\text{H}_2\text{O}$  (20 mL for each), twice with brine (20 mL for each), and dried over  $\text{MgSO}_4$ . The collected organic layer was concentrated under reduced pressure. Finally, the reaction mixture was purified by silica gel column chromatography with *n*-hexane/ethyl acetate (3/1) to give *C,O*-glycosides **3a-3r** in 71–85% yields.

### Spectroscopic Characterization Data of 3a-3r.

#### (1*S*,2*R*,3*S*,4*R*,5*R*)-2,3,4-tris(benzyloxy)-5-((benzyloxy)methyl)-1-(2-(phenylamino)ethyl)tetrahydro-2H-pyran-1-ol (3a)<sup>S1</sup>

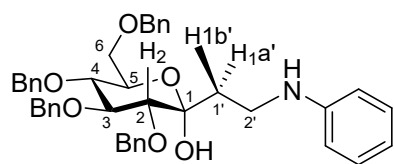

Compound **1a** (0.09 mmol, 51 mg) was treated according to the aforementioned method to give the pale yellow oil **3a** (50.4 mg, 85%):  $[\alpha]_D^{25} +8.3$  ( $c$  0.32,  $\text{CHCl}_3$ );  $^1\text{H NMR}$  ( $\text{CDCl}_3$ , 400 MHz)  $\delta$  7.36-7.11 (23H, m, ArH), 6.76 (1H, dd,  $J = 7.2$  Hz,  $J = 7.2$  Hz, ArH), 6.63 (1H, m, ArH), 4.95 (1H, d,  $J = 11.2$  Hz,  $\text{CH}_2\text{Ph}$ ), 4.91 (2H, d,  $J = 12.0$  Hz,  $\text{CH}_2\text{Ph}$ ), 4.88 (1H, d,  $J = 12.0$  Hz,  $\text{CH}_2\text{Ph}$ ), 4.83 (1H, d,  $J = 10.8$  Hz,  $\text{CH}_2\text{Ph}$ ), 4.68 (1H, d,  $J = 11.2$  Hz,  $\text{CH}_2\text{Ph}$ ), 4.62 (1H, d,  $J = 12.0$  Hz,  $\text{CH}_2\text{Ph}$ ), 4.57 (1H, d,  $J = 10.0$  Hz,  $\text{CH}_2\text{Ph}$ ), 4.54 (1H, d,  $J = 12.0$  Hz,  $\text{CH}_2\text{Ph}$ ), 4.07-4.02 (2H, m, H3, H5), 3.75 (1H, dd,  $J = 4.0$  Hz,  $J = 10.8$  Hz, H6a), 3.70-3.65 (2H, m, H4, H6b), 3.49-3.43 (1H, m, H2a'), 3.37 (1H, d,  $J = 9.2$  Hz, H2), 3.16-3.11 (1H, m, H2b'), 2.13-2.04 (1H, m, H1a'), 1.71-1.65 (1H, m, H1b').  $^{13}\text{C NMR}$  ( $\text{CDCl}_3$ , 100 MHz)  $\delta$  147.8, 138.5, 138.2, 138.1, 137.8, 129.1, 129.1, 128.5, 128.5, 128.4, 128.4, 128.4, 128.4, 128.3, 128.3, 128.3, 128.3, 127.9, 127.8, 127.8, 127.8, 127.8, 127.7, 127.7, 127.6, 127.6, 127.6, 118.8, 114.4, 114.4, 98.7 (C-1), 83.5 (C-3), 82.2 (C-5), 78.4 (C-4), 75.6 ( $\text{PhCH}_2$  at C-3), 75.4 ( $\text{PhCH}_2$  at C-4), 74.8 ( $\text{PhCH}_2$  at C-6), 73.3 ( $\text{PhCH}_2$  at C-2), 71.0 (C-2), 68.8 (C-6), 39.6 (C-2'), 35.4 (C-1'); HRMS (EI):  $m/z$  calcd for  $\text{C}_{42}\text{H}_{45}\text{NO}_6$  ( $\text{M}^+$ ) 659.3247, found 659.3238.

#### (1*S*,2*R*,3*S*,4*R*,5*R*)-2,3,4-tris(benzyloxy)-5-((benzyloxy)methyl)-1-(2-(p-tolylamino)ethyl)tetrahydro-2H-pyran-1-ol (3b)

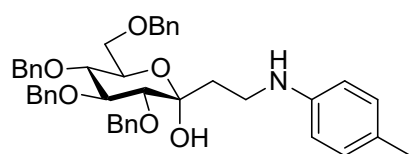

Compound **1a** (0.09 mmol, 51 mg) was treated according to the aforementioned method to give the pale yellow oil **3b** (50.8 mg, 84%):  $[\alpha]_D^{25} +10.7$  (c 0.51, CHCl<sub>3</sub>); <sup>1</sup>H NMR (CDCl<sub>3</sub>, 400 MHz)  $\delta$  7.36-7.17 (m, 20H), 6.94 (d,  $J = 8.4$  Hz, 2H), 6.58 (d,  $J = 8.4$  Hz, 2H), 4.95 (d,  $J = 11.2$  Hz, 1H), 4.90 (brs, 2H), 4.83 (d,  $J = 10.8$  Hz, 1H), 4.67 (d,  $J = 11.2$  Hz, 1H), 4.61 (d,  $J = 12.0$  Hz, 1H), 4.57 (d,  $J = 12.0$  Hz, 1H), 4.54 (d,  $J = 12.0$  Hz, 1H), 4.07-4.01 (m, 2H), 3.75 (dd,  $J = 4.0$  Hz,  $J = 10.8$  Hz, 1H), 3.72-3.64 (m, 2H), 3.53-3.46 (m, 1H), 3.35 (d,  $J_{2,3} = 9.2$  Hz, 1H), 3.14-3.09 (m, 1H), 2.23 (s, 3H), 2.13-2.06 (m, 1H), 1.66-1.60 (m, 1H); <sup>13</sup>C NMR (CDCl<sub>3</sub>, 100 MHz)  $\delta$  145.4, 138.6, 138.3, 138.1, 137.9, 129.6, 129.6, 128.5, 128.5, 128.5, 128.4, 128.4, 128.3, 128.3, 128.3, 128.3, 128.3, 128.3, 128.3, 127.8, 127.8, 127.8, 127.7, 127.7, 127.7, 127.6, 127.5, 127.5, 115.0, 115.0, 98.8, 83.5, 82.4, 78.5, 75.5, 75.4, 74.8, 73.3, 70.9, 68.9, 40.3, 35.3, 20.4; HRMS (EI):  $m/z$  calcd for C<sub>43</sub>H<sub>47</sub>NO<sub>6</sub> (M<sup>+</sup>) 673.3403, found 673.3396.

**(1S,2R,3S,4R,5R)-2,3,4-tris(benzyloxy)-5-((benzyloxy)methyl)-1-(2-((4-ethylphenyl)amino)ethyl)tetrahydro-2H-pyran-1-ol (3c)**

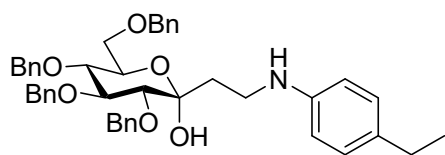

Compound **1a** (0.09 mmol, 51 mg) was treated according to the aforementioned method to give the pale yellow oil **3c** (50.1 mg, 81%):  $[\alpha]_D^{25} +9.4$  (c 0.72, CHCl<sub>3</sub>); <sup>1</sup>H NMR (CDCl<sub>3</sub>, 400 MHz)  $\delta$  7.36-7.17 (m, 20H), 6.97 (d,  $J = 8.4$  Hz, 2H), 6.61 (d,  $J = 8.4$  Hz, 2H), 4.95 (d,  $J = 11.2$  Hz, 1H), 4.90 (brs, 2H), 4.83 (d,  $J = 11.2$  Hz, 1H), 4.67 (d,  $J = 11.2$  Hz, 1H), 4.61 (d,  $J = 12.4$  Hz, 1H), 4.57 (d,  $J = 11.2$  Hz, 1H), 4.54 (d,  $J = 12.4$  Hz, 1H), 4.07-4.01 (m, 2H), 3.75 (dd,  $J = 4.0$  Hz,  $J = 10.8$  Hz, 1H), 3.69-3.64 (m, 2H), 3.54-3.47 (m, 1H), 3.35 (d,  $J_{2,3} = 9.2$  Hz, 1H), 3.15-3.10 (m, 1H), 2.53 (q,  $J = 7.2$  Hz, 2H),

2.14-2.06 (m, 1H), 166-1.60 (m, 1H), 1.18 (t,  $J = 7.2$  Hz, 3H);  $^{13}\text{C}$  NMR ( $\text{CDCl}_3$ , 100 MHz)  $\delta$  145.5, 138.6, 138.2, 138.1, 137.9, 135.2, 128.5, 128.5, 128.4, 128.4, 128.4, 128.4, 128.3, 128.3, 128.3, 128.3, 128.3, 128.3, 128.3, 128.3, 127.8, 127.8, 127.8, 127.7, 127.7, 127.7, 127.6, 127.6, 127.5, 115.0, 115.0, 98.8, 83.4, 82.4, 78.5, 75.5, 75.4, 74.8, 73.3, 70.9, 68.9, 40.2, 35.2, 27.9, 15.9. HRMS (EI)  $m/z$  calcd for  $\text{C}_{44}\text{H}_{49}\text{NO}_6$  ( $\text{M}^+$ ) 687.3560, found 687.3567.

**(1*S*,2*R*,3*S*,4*R*,5*R*)-2,3,4-tris(benzyloxy)-5-((benzyloxy)methyl)-1-(2-((4-isopropylphenyl)amino)ethyl)tetrahydro-2H-pyran-1-ol (3d)**

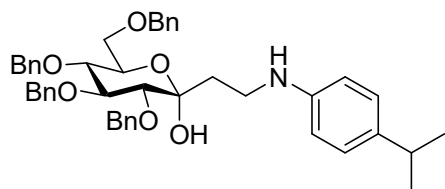

Compound **1a** (0.09 mmol, 51 mg) was treated according to the aforementioned method to give the pale yellow oil **3d** (51.6 mg, 82%):  $[\alpha]_{\text{D}}^{25} +12.3$  (c 0.81,  $\text{CHCl}_3$ );  $^1\text{H}$  NMR ( $\text{CDCl}_3$ , 400 MHz)  $\delta$  7.37-7.24 (m, 18H), 7.19-7.17 (m, 2H), 7.00 (d,  $J = 8.4$  Hz, 2H), 6.62 (d,  $J = 8.4$  Hz, 2H), 4.95 (d,  $J = 11.2$  Hz, 1H), 4.90 (brs, 2H), 4.83 (d,  $J = 10.8$  Hz, 1H), 4.67 (d,  $J = 11.2$  Hz, 1H), 4.62 (d,  $J = 12.4$  Hz, 1H), 4.57 (d,  $J = 10.8$  Hz, 1H), 4.54 (d,  $J = 12.4$  Hz, 1H), 4.08-4.01 (m, 2H), 3.76 (dd,  $J = 4.0$  Hz,  $J = 10.8$  Hz, 1H), 3.69-3.65 (m, 2H), 3.55-3.48 (m, 1H), 3.34 (d,  $J_{2,3} = 9.2$  Hz, 1H), 3.15-3.10 (m, 1H), 2.83-2.76 (m, 1H), 2.14-2.07 (m, 1H), 166-1.60 (m, 1H), 1.19 (s, 6H);  $^{13}\text{C}$  NMR ( $\text{CDCl}_3$ , 100 MHz)  $\delta$  145.6, 139.8, 138.6, 138.3, 138.1, 137.9, 128.5, 128.5, 128.4, 128.4, 128.3, 128.3, 128.3, 128.3, 128.3, 128.3, 128.3, 127.8, 127.8, 127.7, 127.7, 127.7, 127.7, 127.7, 127.6, 127.5, 127.5, 127.0, 127.0, 114.9, 114.9, 98.8, 83.4, 82.5, 78.6, 75.5, 75.4, 74.8, 73.3, 70.8, 68.9, 40.2, 35.2, 33.2, 24.1, 24.1; HRMS (EI):  $m/z$  calcd for  $\text{C}_{45}\text{H}_{51}\text{NO}_6$  ( $\text{M}^+$ ) 701.3716, found 701.3717.

**(1*S*,2*R*,3*S*,4*R*,5*R*)-2,3,4-tris(benzyloxy)-5-((benzyloxy)methyl)-1-(2-((4-(tert-butyl)phenyl)amino)ethyl)tetrahydro-2H-pyran-1-ol (3e)**

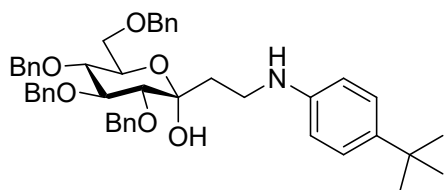

Compound **1a** (0.09 mmol, 51 mg) was treated according to the aforementioned method to give the pale yellow oil **3e** (52.1 mg, 81%):  $[\alpha]_D^{25} +12.8$  (c 0.63,  $\text{CHCl}_3$ );  $^1\text{H NMR}$  ( $\text{CDCl}_3$ , 400 MHz)  $\delta$  7.36-7.24 (m, 18H), 7.19-7.15 (m, 4H), 6.62-6.61 (m, 2H), 4.95 (d,  $J = 11.2$  Hz, 1H), 4.90 (brs, 2H), 4.83 (d,  $J = 10.8$  Hz, 1H), 4.68 (d,  $J = 11.2$  Hz, 1H), 4.62 (d,  $J = 12.4$  Hz, 1H), 4.57 (d,  $J = 10.8$  Hz, 1H), 4.54 (d,  $J = 12.4$  Hz, 1H), 4.08-4.02 (m, 2H), 3.76 (dd,  $J = 4.0$  Hz,  $J = 10.8$  Hz, 1H), 3.72-3.65 (m, 2H), 3.55-3.49 (m, 1H), 3.35 (d,  $J = 9.2$  Hz, 1H), 3.15-3.10 (m, 1H), 2.14-2.07 (m, 1H), 1.65-1.62 (m, 1H), 1.26 (s, 9H);  $^{13}\text{C NMR}$  ( $\text{CDCl}_3$ , 100 MHz)  $\delta$  145.2, 142.0, 138.6, 138.2, 138.2, 137.9, 128.5, 128.5, 128.4, 128.4, 128.4, 128.3, 128.3, 128.3, 128.3, 128.3, 128.3, 127.8, 127.8, 127.7, 127.7, 127.7, 127.7, 127.6, 127.5, 127.5, 125.9, 125.9, 114.6, 114.6, 98.8, 83.4, 82.5, 78.6, 75.5, 75.4, 74.8, 73.3, 70.8, 68.9, 40.1, 35.2, 33.9, 31.4, 31.4, 31.4; HRMS (EI):  $m/z$  calcd for  $\text{C}_{46}\text{H}_{53}\text{NO}_6$  ( $\text{M}^+$ ) 715.3873, found 715.3865.

**(1*S*,2*R*,3*S*,4*R*,5*R*)-2,3,4-tris(benzyloxy)-5-((benzyloxy)methyl)-1-(2-((4-benzylphenyl)amino)ethyl)tetrahydro-2H-pyran-1-ol (3f)**

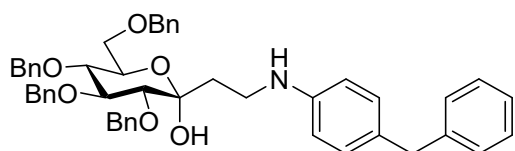

Compound **1a** (0.09 mmol, 51 mg) was treated according to the aforementioned method to give the pale yellow oil **3f** (56.0 mg, 83%):  $[\alpha]_D^{25} +17.6$  (c 0.26,  $\text{CHCl}_3$ );  $^1\text{H NMR}$

(CDCl<sub>3</sub>, 400 MHz)  $\delta$  7.34-7.15 (m, 25H), 6.95 (d,  $J = 8.4$  Hz, 2H), 6.58 (d,  $J = 8.4$  Hz, 2H), 4.94 (d,  $J = 11.2$  Hz, 1H), 4.90 (brs, 2H), 4.83 (d,  $J = 10.8$  Hz, 1H), 4.67 (d,  $J = 11.2$  Hz, 1H), 4.60 (d,  $J = 12.0$  Hz, 1H), 4.56 (d,  $J = 10.8$  Hz, 1H), 4.52 (d,  $J = 12.0$  Hz, 1H), 4.06-4.01 (m, 2H), 3.86 (s, 2H), 3.75 (dd,  $J = 4.0$  Hz,  $J = 10.8$  Hz, 1H), 3.69-3.64 (m, 2H), 3.50-3.44 (m, 1H), 3.35 (d,  $J_{2,3} = 9.4$  Hz, 1H), 3.14-3.09 (m, 1H), 2.12-2.05 (m, 1H), 1.66-1.61 (m, 1H); <sup>13</sup>C NMR (CDCl<sub>3</sub>, 100 MHz)  $\delta$  146.0, 141.8, 138.6, 138.3, 138.1, 137.9, 131.7, 129.6, 129.6, 128.7, 128.7, 128.5, 128.5, 128.4, 128.4, 128.4, 128.4, 128.3, 128.3, 128.3, 128.3, 128.3, 128.3, 128.3, 127.9, 127.7, 127.7, 127.7, 127.7, 127.6, 127.6, 127.6, 125.8, 114.8, 114.8, 98.8, 83.5, 82.3, 78.5, 75.6, 75.4, 74.8, 73.3, 70.9, 68.9, 41.0, 41.0, 35.4; HRMS (EI):  $m/z$  calcd for C<sub>49</sub>H<sub>51</sub>NO<sub>6</sub> (M<sup>+</sup>) 749.3716, found 749.3724.

**(1*S*,2*R*,3*S*,4*R*,5*R*)-2,3,4-tris(benzyloxy)-5-((benzyloxy)methyl)-1-(2-((4-fluorophenyl)amino)ethyl)tetrahydro-2H-pyran-1-ol (3g)**

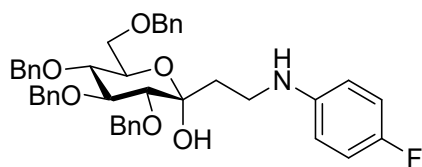

Compound **1a** (0.09 mmol, 51 mg) was treated according to the aforementioned method to give the pale yellow oil **3g** (49.4 mg, 81%):  $[\alpha]_D^{25} +16.2$  (c 0.51, CHCl<sub>3</sub>); <sup>1</sup>H NMR (CDCl<sub>3</sub>, 400 MHz)  $\delta$  7.35-7.25 (m, 18H), 7.20-7.18 (m, 2H), 6.81 (d,  $J = 8.8$  Hz, 1H), 6.79 (d,  $J = 8.8$  Hz, 1H), 6.56-6.53 (m, 2H), 4.95 (d,  $J = 11.2$  Hz, 1H), 4.91 (d,  $J = 11.2$  Hz, 1H), 4.88 (d,  $J = 11.2$  Hz, 1H), 4.84 (d,  $J = 10.8$  Hz, 1H), 4.67 (d,  $J = 11.2$  Hz, 1H), 4.60 (d,  $J = 12.0$  Hz, 1H), 4.57 (d,  $J = 10.8$  Hz, 1H), 4.53 (d,  $J = 12.0$  Hz, 1H), 4.06-4.02 (m, 2H), 3.74 (dd,  $J = 4.0$  Hz,  $J = 10.8$  Hz, 1H), 3.69-3.64 (m, 2H), 3.42-3.35 (m, 2H), 3.12-3.06 (m, 1H), 2.11-2.03 (m, 1H), 1.69-1.63 (m, 1H). <sup>13</sup>C NMR (CDCl<sub>3</sub>, 100 MHz)  $\delta$  156.6 (d,  $J = 234.9$  Hz), 144.0, 138.5, 138.2, 138.0, 137.8, 128.5, 128.5, 128.4,

128.4, 128.4, 128.4, 128.4, 128.4, 128.3, 128.3, 128.3, 127.9, 127.8, 127.8, 127.7, 127.7, 127.7, 127.7, 127.6, 127.6, 127.6, 115.6 (d,  $J = 6.5$  Hz), 115.4 (d,  $J = 8.2$  Hz), 98.7, 83.5, 82.1, 78.5, 75.63, 75.4, 74.8, 73.3, 70.9, 68.9, 40.5, 35.4; HRMS (EI):  $m/z$  calcd for  $C_{42}H_{44}FNO_6$  ( $M^+$ ) 677.3153, found 677.3143.

**(1*S*,2*R*,3*S*,4*R*,5*R*)-2,3,4-tris(benzyloxy)-5-((benzyloxy)methyl)-1-(2-((4-chlorophenyl)amino)ethyl)tetrahydro-2H-pyran-1-ol (3h)**

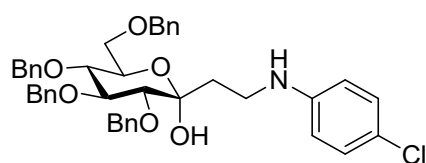

Compound **1a** (0.09 mmol, 51 mg) was treated according to the aforementioned method to give the pale yellow oil **3h** (53.1 mg, 85%):  $[\alpha]_D^{25} +9.3$  (c 0.43,  $CHCl_3$ );  $^1H$  NMR ( $CDCl_3$ , 400 MHz)  $\delta$  7.35-7.25 (m, 18H), 7.20-7.17 (m, 2H), 7.04-7.02 (m, 2H), 6.48-6.46 (m, 2H), 4.94 (d,  $J = 11.2$  Hz, 1H), 4.92 (d,  $J = 9.6$  Hz, 1H), 4.87 (d,  $J = 10.8$  Hz, 1H), 4.83 (d,  $J = 10.8$  Hz, 1H), 4.66 (d,  $J = 11.2$  Hz, 1H), 4.59 (d,  $J = 12.0$  Hz, 1H), 4.57 (d,  $J = 10.8$  Hz, 1H), 4.53 (d,  $J = 12.0$  Hz, 1H), 4.09 (brs, 1H), 4.04-4.00 (m, 2H), 3.74 (dd,  $J = 4.0$  Hz,  $J = 10.8$  Hz, 1H), 3.69-3.63 (m, 2H), 3.38 (d,  $J = 9.2$  Hz, 1H), 3.33-3.26 (m, 1H), 3.11-3.06 (m, 1H), 2.08-2.00 (m, 1H), 1.74-1.68 (m, 1H);  $^{13}C$  NMR ( $CDCl_3$ , 100 MHz)  $\delta$  146.6, 138.4, 138.1, 138.0, 137.7, 128.9, 128.9, 128.4, 128.4, 128.4, 128.4, 128.4, 128.4, 128.3, 128.3, 128.0, 127.8, 127.8, 127.8, 127.8, 127.7, 127.7, 127.7, 127.7, 127.6, 122.9, 115.1, 115.1, 98.7, 83.5, 81.8, 78.4, 75.6, 75.4, 74.9, 73.4, 71.1, 68.8, 39.5, 35.7; HRMS (EI):  $m/z$  calcd for  $C_{42}H_{44}ClNO_6$  ( $M^+$ ) 693.2857, found 693.2850.

**(1*S*,2*R*,3*S*,4*R*,5*R*)-2,3,4-tris(benzyloxy)-5-((benzyloxy)methyl)-1-(2-((4-bromophenyl)amino)ethyl)tetrahydro-2H-pyran-1-ol (3i)**

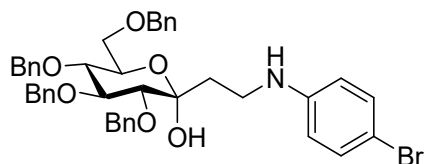

Compound **1a** (0.09 mmol, 51 mg) was treated according to the aforementioned method to give the pale yellow oil **3i** (55.0 mg, 83%):  $[\alpha]_D^{25} +11.2$  (c 0.32,  $\text{CHCl}_3$ );  $^1\text{H NMR}$  ( $\text{CDCl}_3$ , 400 MHz)  $\delta$  7.35-7.26 (m, 18H), 7.20-7.14 (m, 4H), 6.42 (d,  $J = 8.8$  Hz, 2H), 4.94 (d,  $J = 11.2$  Hz, 1H), 4.92 (d,  $J = 10.8$  Hz, 1H), 4.87 (d,  $J = 10.8$  Hz, 1H), 4.83 (d,  $J = 10.8$  Hz, 1H), 4.66 (d,  $J = 11.2$  Hz, 1H), 4.59 (d,  $J = 12.0$  Hz, 1H), 4.57 (d,  $J = 10.8$  Hz, 1H), 4.66 (d,  $J = 11.2$  Hz, 1H), 4.59 (d,  $J = 12.0$  Hz, 1H), 4.57 (d,  $J = 10.8$  Hz, 1H), 4.66 (d,  $J = 11.2$  Hz, 1H), 4.59 (d,  $J = 12.0$  Hz, 1H), 4.57 (d,  $J = 10.8$  Hz, 1H), 4.04-3.99 (m, 2H), 3.74 (dd,  $J = 4.0$  Hz,  $J = 10.8$  Hz, 1H), 3.69-3.63 (m, 2H), 3.38 (d,  $J = 9.6$  Hz, 1H), 3.31-3.24 (m, 1H), 3.11-3.05 (m, 1H), 2.07-2.01 (m, 1H), 1.75-1.69 (m, 1H);  $^{13}\text{C NMR}$  ( $\text{CDCl}_3$ , 100 MHz)  $\delta$  147.0, 138.4, 138.1, 137.9, 137.7, 131.8, 131.8, 128.4, 128.4, 128.4, 128.4, 128.4, 128.4, 128.4, 128.4, 128.4, 128.4, 128.3, 128.0, 127.8, 127.8, 127.8, 127.8, 127.7, 127.7, 127.7, 127.6, 115.5, 115.5, 109.9, 98.6, 83.5, 81.7, 78.3, 75.6, 75.4, 74.9, 73.4, 71.1, 68.8, 39.4, 35.7; HRMS (EI):  $m/z$  calcd for  $\text{C}_{42}\text{H}_{44}\text{BrNO}_6$  ( $\text{M}^+$ ) 737.2352, found 737.2361.

**(1S,2R,3S,4R,5R)-2,3,4-tris(benzyloxy)-5-((benzyloxy)methyl)-1-(2-(m-tolylamino)ethyl)tetrahydro-2H-pyran-1-ol (3j)**

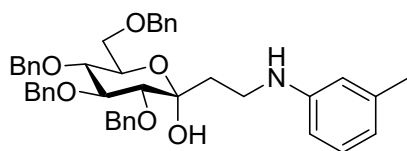

Compound **1a** (0.09 mmol, 51 mg) was treated according to the aforementioned method to give the pale yellow oil **3j** (44.8 mg, 74%):  $[\alpha]_D^{25} +16.4$  (c 0.33,  $\text{CHCl}_3$ );  $^1\text{H NMR}$  ( $\text{CDCl}_3$ , 400 MHz)  $\delta$  7.37-7.16 (m, 20H), 7.02 (dd,  $J = 7.6$  Hz,  $J = 7.6$  Hz, 1H), 6.59 (d,  $J = 7.6$  Hz, 1H), 6.47-6.45 (m, 2H), 4.95 (d,  $J = 11.2$  Hz, 1H), 4.91 (d,  $J = 11.2$  Hz,

1H), 4.88 (d,  $J = 11.2$  Hz, 1H), 4.83 (d,  $J = 10.8$  Hz, 1H), 4.68 (d,  $J = 11.2$  Hz, 1H), 4.62 (d,  $J = 12.4$  Hz, 1H), 4.57 (d,  $J = 10.8$  Hz, 1H), 4.54 (d,  $J = 12.4$  Hz, 1H), 4.07-4.00 (m, 2H), 3.76 (dd,  $J = 4.0$  Hz,  $J = 10.8$  Hz, 1H), 3.70-3.65 (m, 2H), 3.50-3.43 (m, 1H), 3.36 (d,  $J = 9.6$  Hz, 1H), 3.16-3.10 (m, 1H), 2.24 (s, 3H), 2.13-2.06 (m, 1H), 1.70-1.64 (m, 1H);  $^{13}\text{C}$  NMR ( $\text{CDCl}_3$ , 100 MHz)  $\delta$  147.8, 138.9, 138.6, 138.2, 138.1, 137.9, 129.0, 128.5, 128.5, 128.4, 128.4, 128.4, 128.3, 128.3, 128.3, 128.3, 128.3, 128.3, 127.9, 127.8, 127.8, 127.7, 127.7, 127.7, 127.6, 127.6, 127.6, 119.9, 115.2, 111.7, 98.7, 83.5, 82.3, 78.5, 75.6, 75.4, 74.8, 73.3, 71.0, 68.8, 39.8, 35.5, 21.5; HRMS (EI):  $m/z$  calcd for  $\text{C}_{43}\text{H}_{47}\text{NO}_6$  ( $\text{M}^+$ ) 673.3403, found 673.3408.

**(1*S*,2*R*,3*S*,4*R*,5*R*)-2,3,4-tris(benzyloxy)-5-((benzyloxy)methyl)-1-(2-((3-chlorophenyl)amino)ethyl)tetrahydro-2H-pyran-1-ol (3k)**

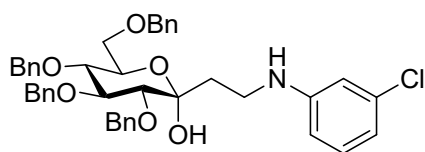

Compound **1a** (0.09 mmol, 51 mg) was treated according to the aforementioned method to give the pale yellow oil **3k** (47.4 mg, 76%):  $[\alpha]_{\text{D}}^{25} +6.3$  (c 0.16,  $\text{CHCl}_3$ );  $^1\text{H}$  NMR ( $\text{CDCl}_3$ , 400 MHz)  $\delta$  7.37-7.25 (m, 18H), 7.18-7.16 (m, 2H), 6.98 (dd,  $J = 8.0$  Hz,  $J = 8.0$  Hz, 1H), 6.67 (d,  $J = 7.6$  Hz, 1H), 6.55 (brs, 1H), 6.39 (d,  $J = 8.0$  Hz, 1H), 4.93 (d,  $J = 10.8$  Hz, 1H), 4.89 (d,  $J = 10.8$  Hz, 1H), 4.86 (d,  $J = 10.8$  Hz, 1H), 4.81 (d,  $J = 10.8$  Hz, 1H), 4.69-4.66 (m, 2H), 4.61 (d,  $J = 12.0$  Hz, 1H), 4.56 (d,  $J = 10.8$  Hz, 1H), 4.54 (d,  $J = 12.0$  Hz, 1H), 4.26 (brs, 1H), 4.03-3.98 (m, 2H), 3.75-3.63 (m, 3H), 3.39 (d,  $J = 9.2$  Hz, 1H), 3.26-3.21 (m, 1H), 3.10-3.07 (m, 1H), 2.06-1.99 (m, 1H), 1.76-1.71 (m, 1H);  $^{13}\text{C}$  NMR ( $\text{CDCl}_3$ , 100 MHz)  $\delta$  149.3, 138.5, 138.1, 138.0, 137.7, 134.9, 130.0, 128.5, 128.5, 128.5, 128.5, 128.4, 128.4, 128.4, 128.3, 128.3, 128.0, 127.8, 127.8, 127.8, 127.8, 127.7, 127.7, 127.7, 127.7, 127.6, 126.9, 117.8, 113.2, 112.2, 98.6, 83.6,

81.5, 78.3, 75.6, 75.4, 74.9, 73.4, 71.2, 68.7, 39.1, 35.9; HRMS (EI):  $m/z$  calcd for  $C_{42}H_{44}ClNO_6$  ( $M^+$ ) 693.2857, found 693.2851.

**(1*S*,2*R*,3*S*,4*R*,5*R*)-2,3,4-tris(benzyloxy)-5-((benzyloxy)methyl)-1-(2-((2-iodophenyl)amino)ethyl)tetrahydro-2H-pyran-1-ol (3l)**

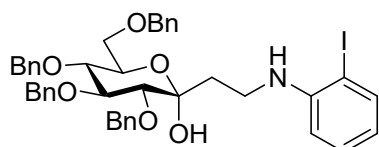

Compound **1a** (0.09 mmol, 51 mg) was treated according to the aforementioned method to give the pale yellow oil **3l** (52.9 mg, 75%):  $[\alpha]_D^{25}$  -0.8 (c 0.38,  $CHCl_3$ );  $^1H$  NMR ( $CDCl_3$ , 400 MHz)  $\delta$  7.65 (dd,  $J = 1.4$  Hz,  $J = 7.6$  Hz, 1H), 7.33-7.25 (m, 18H), 7.20-7.17 (m, 2H), 7.16 (dd,  $J = 1.4$  Hz,  $J = 8.0$  Hz, 1H), 6.60 (dd,  $J = 1.4$  Hz,  $J = 8.0$  Hz, 1H), 6.47 (dd,  $J = 1.4$  Hz,  $J = 7.6$  Hz, 1H), 4.95 (d,  $J = 11.2$  Hz, 1H), 4.90 (d,  $J = 11.2$  Hz, 1H), 4.87 (d,  $J = 10.8$  Hz, 1H), 4.83 (d,  $J = 10.8$  Hz, 1H), 4.68 (d,  $J = 11.2$  Hz, 1H), 4.60 (d,  $J = 11.2$  Hz, 2H), 4.52 (d,  $J = 12.0$  Hz, 1H), 4.25 (brs, 1H), 4.05-4.00 (m, 2H), 3.81-3.77 (dd,  $J = 3.6$  Hz,  $J = 10.8$  Hz, 1H), 3.74-3.68 (m, 3H), 3.38 (m, 2H), 3.17-3.14 (m, 1H), 2.13-2.06 (m, 1H), 1.80-1.74 (m, 1H);  $^{13}C$  NMR ( $CDCl_3$ , 100 MHz)  $\delta$  147.2, 139.0, 138.5, 138.2, 138.2, 137.7, 129.3, 128.5, 128.5, 128.4, 128.4, 128.4, 128.4, 128.4, 128.4, 128.3, 128.3, 128.3, 128.0, 127.7, 127.7, 127.7, 127.7, 127.7, 127.7, 127.6, 127.5, 119.5, 111.8, 98.3, 86.5, 83.6, 82.2, 78.3, 75.6, 75.4, 74.8, 73.4, 71.4, 68.8, 39.2, 36.2; HRMS (EI):  $m/z$  calcd for  $C_{42}H_{44}INO_6$  ( $M^+$ ) 785.2213, found 785.2219.

**(1*S*,2*R*,3*S*,4*S*,5*R*)-2,3,4-tris(benzyloxy)-5-((benzyloxy)methyl)-1-(2-(phenylamino)ethyl)tetrahydro-2H-pyran-1-ol (3m)**

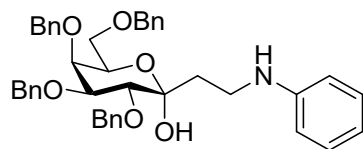

Compound **1b** (0.09 mmol, 51 mg) was treated according to the aforementioned method to give the pale yellow oil **3m** (48.6 mg, 82%):  $[\alpha]^{25}_D +6.9$  (c 0.43,  $\text{CHCl}_3$ );  $^1\text{H NMR}$  ( $\text{CDCl}_3$ , 400 MHz)  $\delta$  7.37-7.24 (m, 20H), 7.14-7.10 (m, 2H), 6.76-6.72 (m, 1H), 6.62-6.60 (m, 2H), 4.97 (d,  $J = 11.2$  Hz, 1H), 4.94 (d,  $J = 11.2$  Hz, 1H), 4.75 (d,  $J = 11.6$  Hz, 1H), 4.70 (d,  $J = 11.6$  Hz, 1H), 4.67 (d,  $J = 11.3$  Hz, 1H), 4.62 (d,  $J = 11.3$  Hz, 1H), 4.49 (d,  $J = 11.8$  Hz, 1H), 4.46 (d,  $J = 11.8$  Hz, 1H), 4.16 (dd,  $J = 6.4$  Hz,  $J = 6.7$  Hz, 1H), 4.01-3.96 (m, 2H), 3.84 (d,  $J = 9.4$  Hz, 1H), 3.61-3.55 (m, 2H), 3.49-3.42 (m, 1H), 3.16-3.10 (m, 1H), 2.15-2.08 (m, 1H), 1.76-1.70 (m, 1H);  $^{13}\text{C NMR}$  ( $\text{CDCl}_3$ , 100 MHz)  $\delta$  147.9, 138.8, 138.4, 138.1, 138.0, 129.1, 129.1, 128.6, 128.6, 128.4, 128.4, 128.4, 128.4, 128.3, 128.3, 128.3, 128.2, 128.2, 128.0, 128.0, 127.8, 127.8, 127.6, 127.5, 127.5, 127.5, 127.5, 118.7, 114.4, 114.4, 99.1, 80.8, 78.9, 75.5, 74.4, 74.4, 73.4, 72.4, 69.9, 69.0, 39.5, 35.7; HRMS (EI):  $m/z$  calcd for  $\text{C}_{42}\text{H}_{45}\text{NO}_6$  ( $\text{M}^+$ ) 659.3247, found 659.3252.

**(1S,2R,3S,4S,5R)-2,3,4-tris(benzyloxy)-5-((benzyloxy)methyl)-1-(2-(p-tolylamino)ethyl)tetrahydro-2H-pyran-1-ol (3n)**

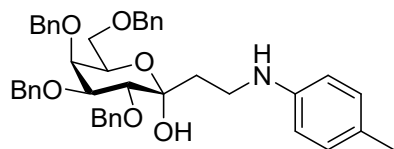

Compound **1b** (0.09 mmol, 51 mg) was treated according to the aforementioned method to give the pale yellow oil **3n** (46.0 mg, 76%):  $[\alpha]^{25}_D +5.8$  (c 0.75,  $\text{CHCl}_3$ );  $^1\text{H NMR}$  ( $\text{CDCl}_3$ , 400 MHz)  $\delta$  7.37-7.24 (m, 20H), 6.93 (d,  $J = 8.0$  Hz, 2H), 6.56 (d,  $J = 8.0$  Hz, 2H), 4.96 (d,  $J = 11.2$  Hz, 1H), 4.94 (d,  $J = 12.0$  Hz, 1H), 4.74 (d,  $J = 11.6$  Hz, 1H),

4.70 (d,  $J = 11.6$  Hz, 1H), 4.67 (d,  $J = 11.6$  Hz, 1H), 4.62 (d,  $J = 11.6$  Hz, 1H), 4.48 (d,  $J = 12.0$  Hz, 1H), 4.44 (d,  $J = 12.0$  Hz, 1H), 4.19-4.15 (m, 1H), 4.00-3.98 (m, 2H), 3.82 (d,  $J_{2,3} = 9.6$  Hz, 1H), 3.61-3.45 (m, 3H), 3.13-3.08 (m, 1H), 2.22 (s, 3H), 2.16-2.09 (m, 1H), 1.70-1.65 (m, 1H);  $^{13}\text{C}$  NMR ( $\text{CDCl}_3$ , 100 MHz)  $\delta$  145.4, 138.8, 138.5, 138.2, 138.0, 129.6, 129.6, 128.6, 128.6, 128.4, 128.3, 128.3, 128.3, 128.3, 128.3, 128.2, 128.2, 128.1, 128.1, 128.0, 128.0, 127.8, 127.8, 127.7, 127.6, 127.5, 127.5, 127.5, 114.9, 114.9, 99.1, 80.7, 79.1, 75.4, 74.6, 74.4, 73.4, 72.5, 69.8, 69.0, 40.2, 35.5, 20.4; HRMS (EI):  $m/z$  calcd for  $\text{C}_{43}\text{H}_{47}\text{NO}_6$  ( $\text{M}^+$ ) 673.3403, found 673.3409.

**(1*S*,2*R*,3*S*,4*S*,5*R*)-2,3,4-tris(benzyloxy)-5-((benzyloxy)methyl)-1-(2-((4-isopropylphenyl)amino)ethyl)tetrahydro-2H-pyran-1-ol (3o)**

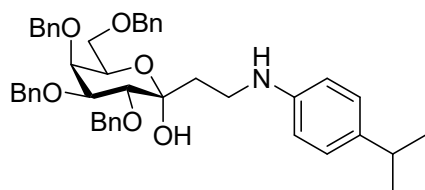

Compound **1b** (0.09 mmol, 51 mg) was treated according to the aforementioned method to give the pale yellow oil **3o** (49.8 mg, 79%):  $[\alpha]_D^{25} +4.3$  (c 0.37,  $\text{CHCl}_3$ );  $^1\text{H}$  NMR ( $\text{CDCl}_3$ , 400 MHz)  $\delta$  7.36-7.25 (m, 20H), 6.99 (d,  $J = 8.4$  Hz, 2H), 6.60 (d,  $J = 8.4$  Hz, 2H), 4.97 (d,  $J = 11.2$  Hz, 1H), 4.94 (d,  $J = 11.6$  Hz, 1H), 4.75 (d,  $J = 11.6$  Hz, 1H), 4.71 (d,  $J = 11.6$  Hz, 1H), 4.67 (d,  $J = 11.2$  Hz, 1H), 4.63 (d,  $J = 11.6$  Hz, 1H), 4.49 (d,  $J = 11.6$  Hz, 1H), 4.46 (d,  $J = 11.6$  Hz, 1H), 4.18-4.15 (m, 1H), 4.00-3.98 (m, 2H), 3.82 (d,  $J = 9.6$  Hz, 1H), 3.62-3.47 (m, 3H), 3.14-3.09 (m, 1H), 2.82-2.75 (m, 1H), 2.17-2.10 (m, 1H), 1.70-1.65 (m, 1H), 1.19 (d  $J = 6.8$  Hz, 6H);  $^{13}\text{C}$  NMR ( $\text{CDCl}_3$ , 100 MHz)  $\delta$  145.7, 139.6, 138.8, 138.5, 138.2, 138.1, 128.6, 128.6, 128.4, 128.3, 128.3, 128.3, 128.3, 128.2, 128.1, 128.1, 128.0, 128.0, 127.8, 127.7, 127.7, 127.6, 127.5, 127.5, 127.5, 127.4, 127.0, 126.9, 114.9, 114.9, 99.2, 80.7, 79.1, 75.4, 74.6, 74.4, 73.4, 72.5,

69.8, 69.1, 40.1, 35.4, 33.2, 24.1, 24.1; HRMS (EI):  $m/z$  calcd for  $C_{45}H_{51}NO_6$  ( $M^+$ ) 701.3716, found 701.3713.

**(1*S*,2*R*,3*S*,4*S*,5*R*)-2,3,4-tris(benzyloxy)-5-((benzyloxy)methyl)-1-(2-((4-chlorophenyl)amino)ethyl)tetrahydro-2H-pyran-1-ol (3p)**

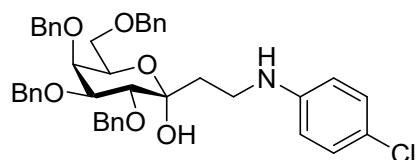

Compound **1b** (0.09 mmol, 51 mg) was treated according to the aforementioned method to give the pale yellow oil **3p** (48.0 mg, 77%):  $[\alpha]_D^{25} +5.4$  (c 0.40,  $CHCl_3$ );  $^1H$  NMR ( $CDCl_3$ , 400 MHz)  $\delta$  7.38-7.27 (m, 20H), 7.04-7.01 (m, 2H), 6.47-6.45 (m, 2H), 4.96 (d,  $J = 11.6$  Hz, 1H), 4.93 (d,  $J = 11.6$  Hz, 1H), 4.75 (d,  $J = 11.6$  Hz, 1H), 4.69 (d,  $J = 11.6$  Hz, 1H), 4.65 (d,  $J = 11.6$  Hz, 1H), 4.60 (d,  $J = 11.6$  Hz, 1H), 4.48 (d,  $J = 12.0$  Hz, 1H), 4.45 (d,  $J = 12.0$  Hz, 1H), 4.16-4.13 (m, 1H), 4.05 (brs, 1H), 3.99 (dd,  $J = 0.8$  Hz,  $J = 2.8$  Hz, 1H), 3.96 (dd,  $J = 2.8$  Hz,  $J = 9.6$  Hz, 1H), 3.83 (d,  $J = 9.6$  Hz, 1H), 3.57 (d,  $J = 6.4$  Hz, 2H), 3.34-3.28 (m, 1H), 3.12-3.07 (m, 1H), 2.10-2.03 (m, 1H), 1.79-1.73 (m, 1H);  $^{13}C$  NMR ( $CDCl_3$ , 100 MHz)  $\delta$ . 146.6, 138.7, 138.3, 138.0, 137.9, 128.9, 128.9, 128.5, 128.5, 128.4, 128.4, 128.4, 128.4, 128.3, 128.3, 128.2, 128.2, 128.0, 128.0, 127.8, 127.8, 127.8, 127.7, 127.6, 127.5, 127.5, 127.5, 122.8, 115.0, 115.0, 99.0, 80.8, 78.5, 75.5, 74.4, 74.3, 73.4, 72.4, 70.0, 69.0, 39.5, 35.8; HRMS (EI):  $m/z$  calcd for  $C_{42}H_{44}ClNO_6$  ( $M^+$ ) 693.2857, found 693.2850.

**(1*S*,2*R*,3*S*,4*S*,5*R*)-2,3,4-tris(benzyloxy)-5-((benzyloxy)methyl)-1-(2-(*m*-tolylamino)ethyl)tetrahydro-2H-pyran-1-ol (3q)**

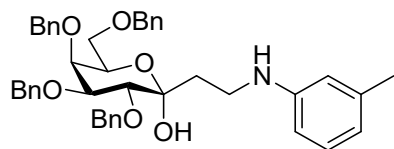

(0.09 mmol, 51 mg) was treated according to the aforementioned method to give the pale yellow oil **3q** (59.7 mg, 71%):  $[\alpha]_D^{25} -12.3$  (c 0.31,  $\text{CHCl}_3$ );  $^1\text{H NMR}$  ( $\text{CDCl}_3$ , 400 MHz)  $\delta$  7.38-7.25 (m, 20H), 7.03-6.99 (m, 1H), 6.57 (d,  $J = 7.6$  Hz, 1H), 6.44-6.43 (m, 2H), 4.96 (d,  $J = 10.8$  Hz, 1H), 4.94 (d,  $J = 10.8$  Hz, 1H), 4.75 (d,  $J = 11.6$  Hz, 1H), 4.70 (d,  $J = 11.6$  Hz, 1H), 4.66 (d,  $J = 11.6$  Hz, 1H), 4.62 (d,  $J = 11.6$  Hz, 1H), 4.49 (d,  $J = 11.6$  Hz, 1H), 4.45 (d,  $J = 11.6$  Hz, 1H), 4.18-4.14 (m, 1H), 4.00 (dd,  $J = 1.2$  Hz,  $J = 2.8$  Hz, 1H), 3.98 (dd,  $J = 2.8$  Hz,  $J = 9.6$  Hz, 1H), 3.83 (d,  $J = 9.6$  Hz, 1H), 3.60 (dd,  $J = 7.2$  Hz,  $J = 9.2$  Hz, 1H), 3.56 (dd,  $J = 6.0$  Hz,  $J = 9.2$  Hz, 1H), 3.49-3.43 (m, 1H), 3.16-3.10 (m, 1H), 2.23 (s, 3H), 2.16-2.08 (m, 1H), 1.75-1.69 (m, 1H);  $^{13}\text{C NMR}$  ( $\text{CDCl}_3$ , 100 MHz)  $\delta$  147.9, 138.8, 138.8, 138.4, 138.2, 138.0, 129.0, 128.5, 128.5, 128.4, 128.4, 128.4, 128.3, 128.3, 128.3, 128.2, 128.2, 128.0, 128.0, 127.8, 127.7, 127.7, 127.6, 127.5, 127.5, 127.5, 127.5, 119.6, 115.1, 111.6, 99.1, 80.8, 79.0, 75.5, 74.5, 74.4, 73.4, 72.5, 69.9, 69.0, 39.6, 35.7, 21.5; HRMS (EI):  $m/z$  calcd for  $\text{C}_{43}\text{H}_{47}\text{NO}_6$  ( $\text{M}^+$ ) 673.3403, found 673.3408.

**(1S,2R,3S,4S,5R)-2,3,4-tris(benzyloxy)-5-((benzyloxy)methyl)-1-(2-((3-chlorophenyl)amino)ethyl)tetrahydro-2H-pyran-1-ol (3r)**

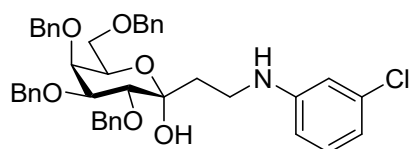

Compound **1b** (0.09 mmol, 51 mg) was treated according to the aforementioned method to give the pale yellow oil **3r** (45.6 mg, 73%):  $[\alpha]_D^{25} -0.3$  (c 0.24,  $\text{CHCl}_3$ );  $^1\text{H NMR}$  ( $\text{CDCl}_3$ , 400 MHz)  $\delta$  7.37-7.27 (m, 20H), 6.99 (dd,  $J = 8.0$  Hz,  $J = 8.0$  Hz, 1H), 6.66

(d,  $J = 7.6$  Hz, 1H), 6.53 (dd,  $J = 2.0$  Hz,  $J = 2.0$  Hz, 1H), 6.38 (dd,  $J = 2.0$  Hz,  $J = 8.0$  Hz, 1H), 4.96 (d,  $J = 11.6$  Hz, 1H), 4.93 (d,  $J = 11.6$  Hz, 1H), 4.75 (d,  $J = 11.6$  Hz, 1H), 4.67 (d,  $J = 11.6$  Hz, 1H), 4.65 (d,  $J = 11.6$  Hz, 1H), 4.60 (d,  $J = 11.6$  Hz, 1H), 4.49 (d,  $J = 12.0$  Hz, 1H), 4.45 (d,  $J = 12.0$  Hz, 1H), 4.14 (t,  $J = 6.8$  Hz, 1H), 4.00 (brs, 1H), 3.94 (dd,  $J = 2.4$  Hz,  $J = 9.6$  Hz, 1H), 3.84 (d,  $J = 9.6$  Hz, 1H), 3.57 (d,  $J = 6.4$  Hz, 2H), 3.30-3.24 (m, 1H), 3.13-3.07 (m, 1H), 2.08-2.01 (m, 1H), 1.82-1.76 (m, 1H);  $^{13}\text{C}$  NMR ( $\text{CDCl}_3$ , 100 MHz)  $\delta$ . 149.2, 138.6, 138.2, 137.9, 137.9, 134.8, 130.0, 128.5, 128.5, 128.4, 128.4, 128.4, 128.4, 128.2, 128.2, 128.2, 127.9, 127.9, 127.9, 127.8, 127.8, 127.8, 127.7, 127.6, 127.5, 127.5, 127.5, 117.8, 113.2, 112.2, 98.9, 80.9, 78.3, 75.5, 74.4, 74.1, 73.4, 72.3, 70.1, 69.9, 39.1, 35.9; HRMS (EI):  $m/z$  calcd for  $\text{C}_{42}\text{H}_{44}\text{ClNO}_6$  ( $\text{M}^+$ ) 693.2857, found 693.2850.

#### Typical Procedure for Synthesis of anomeric spiro-glycosides 4a-4y.

To a solution of exo-glycals **1** (0.09 mmol), arylamines (0.11 mmol) and acetic acid (0.68 mmol) in dichloroethane (DCE) (2.0 mL) was added  $\text{ZnCl}_2$  (0.14 mmol). The reaction mixture was stirred at 55 °C under  $\text{N}_2$  for 8 h. When the starting material complete transformed into product **3** (was determined by TLC), increasing temperature to 80 °C then added extra  $\text{ZnCl}_2$  (0.09 mmol) for 8h. After the reaction was complete,  $\text{CH}_2\text{Cl}_2$  (50 mL) was added to the reaction mixture, washed twice with  $\text{H}_2\text{O}$  (20 mL for each), twice with brine (20 mL for each), and dried over  $\text{MgSO}_4$ . The collected organic layer was concentrated under reduced pressure. Finally, the reaction mixture was purified by silica gel column chromatography with *n*-hexane/ethyl acetate (4/1) to give anomeric spiro-glycosides **4a-4y** in 60–90% yields.

#### Spectroscopic Characterization Data of 4a-4y.

(1*S*,2*R*,3*S*,4*R*,5*R*)-2,3,4-tris(benzyloxy)-5-((benzyloxy)methyl)-2',2',3',3,4,5-hexahydro-1'H-spiro[pyran-1,4'-quinoline] (**4a**)<sup>S1</sup>

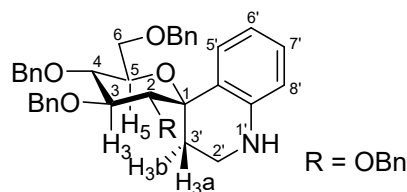

Compound **1a** (0.09 mmol, 51 mg) was treated according to the aforementioned method to give the yellow oil **4a** (49.6 mg, 86%):  $[\alpha]_D^{25} +44.2$  ( $c$  0.22,  $\text{CHCl}_3$ );  $^1\text{H NMR}$  ( $\text{CDCl}_3$ , 400 MHz)  $\delta$  7.48 (2H, d,  $J = 8.0$  Hz, ArH), 7.32-7.17 (18H, m, ArH), 7.06 (1H, dd,  $J = 7.2$  Hz,  $J = 8.0$  Hz, ArH), 6.99-6.98 (2H, m, ArH), 6.72 (1H, dd,  $J = 7.2$  Hz,  $J = 7.6$  Hz, ArH), 6.55 (1H, d,  $J = 8.0$  Hz, ArH), 4.91 (1H, d,  $J = 10.4$  Hz,  $\text{CH}_2\text{Ph}$ ), 4.88 (1H, d,  $J = 10.8$  Hz,  $\text{CH}_2\text{Ph}$ ), 4.84 (1H, d,  $J = 10.8$  Hz,  $\text{CH}_2\text{Ph}$ ), 4.66-4.63 (2H, m,  $\text{CH}_2\text{Ph}$ ), 4.51 (1H, d,  $J = 12.0$  Hz,  $\text{CH}_2\text{Ph}$ ), 4.41 (1H, d,  $J = 10.8$  Hz,  $\text{CH}_2\text{Ph}$ ), 4.04 (1H, d,  $J = 10.4$  Hz,  $\text{CH}_2\text{Ph}$ ), 3.96 (1H, d,  $J = 8.8$  Hz, H2), 3.89 (1H, dd,  $J = 8.4$  Hz,  $J = 8.8$  Hz, H3), 3.84-3.77 (3H, m, H4, H5, H6a), 3.69 (1H, d,  $J = 10.4$  Hz, H6b), 3.48-3.42 (1H, m, H2a'), 3.23-3.18 (1H, m, H2b'), 2.48-2.41 (1H, m, H3a'), 2.16-2.10 (1H, m, H3b');  $^{13}\text{C NMR}$  ( $\text{CDCl}_3$ , 100 MHz)  $\delta$  146.2, 138.7, 138.6, 138.3, 138.3, 128.7, 128.4, 128.4, 128.3, 128.3, 128.2, 128.2, 128.0, 128.0, 127.9, 127.9, 127.8, 127.8, 127.7, 127.7, 127.7, 127.6, 127.5, 127.5, 127.3, 127.3, 123.5, 117.6, 114.9, 85.9 (C-2), 83.5 (C-3), 79.0 (C-4), 75.6 ( $\text{PhCH}_2$  at C-3), 75.1 ( $\text{PhCH}_2$  at C-4), 74.9 ( $\text{PhCH}_2$  at C-6), 74.2 (C-1), 73.4 ( $\text{PhCH}_2$  at C-2), 72.4 (C-5), 69.5 (C-6), 38.5 (C-2'), 26.3 (C-3'); HRMS (EI):  $m/z$  calcd for  $\text{C}_{42}\text{H}_{43}\text{NO}_5$  ( $\text{M}^+$ ) 641.3141, found 641.3133.

**(1S,2R,3S,4R,5R)-2,3,4-tris(benzyloxy)-5-((benzyloxy)methyl)-6'-methyl-2',2,3',3,4,5-hexahydro-1'H-spiro[pyran-1,4'-quinoline] (4b)<sup>S1</sup>**

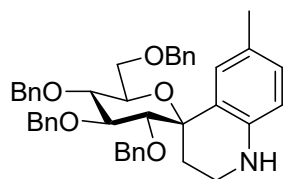

Compound **1a** (0.09 mmol, 51 mg) was treated according to the aforementioned method to give the yellow oil **4b** (48.3 mg, 82%):  $[\alpha]_D^{25} +25.0$  (*c* 0.23, CHCl<sub>3</sub>); <sup>1</sup>H NMR (CDCl<sub>3</sub>, 400 MHz)  $\delta$  7.34-7.17 (m, 19H), 6.99-6.97 (m, 2H), 6.87 (dd, *J* = 1.6 Hz, *J* = 8.0 Hz, 1H), 6.49 (d, *J* = 8.0 Hz, 1H), 4.92 (d, *J* = 10.8 Hz, 1H), 4.88 (d, *J* = 10.8 Hz, 1H), 4.84 (d, *J* = 10.8 Hz, 1H), 4.65 (d, *J* = 12.0 Hz, 1H), 4.63 (d, *J* = 10.4 Hz, 1H), 4.50 (d, *J* = 12.0 Hz, 1H), 4.37 (d, *J* = 10.4 Hz, 1H), 4.05 (d, *J* = 10.8 Hz, 1H), 3.95 (d, *J* = 10.8 Hz, 1H), 3.89-3.76 (m, 4H), 3.69 (d, *J* = 10.4 Hz, 1H), 3.44-3.39 (m, 1H), 3.20-3.14 (m, 1H), 2.46-2.40 (m, 1H), 2.21 (s, 3H), 2.15-2.08 (m, 1H); <sup>13</sup>C NMR (CDCl<sub>3</sub>, 100 MHz)  $\delta$  143.9, 138.8, 138.6, 138.3, 138.2, 129.5, 128.4, 128.4, 128.3, 128.3, 128.2, 128.2, 128.0, 128.0, 128.0, 128.0, 128.0, 128.0, 128.0, 128.0, 127.7, 127.6, 127.6, 127.5, 127.5, 127.5, 127.3, 127.3, 126.7, 123.6, 115.1, 85.7, 83.5, 79.0, 75.5, 75.1, 74.7, 74.3, 73.3, 72.3, 69.5, 38.7, 26.5, 20.7; HRMS (EI): *m/z* calcd for C<sub>43</sub>H<sub>45</sub>NO<sub>5</sub> (M<sup>+</sup>) 655.3298, found 655.3306.

**(1*S*,2*R*,3*S*,4*R*,5*R*)-2,3,4-tris(benzyloxy)-5-((benzyloxy)methyl)-6'-ethyl-2',2',3',3,4,5-hexahydro-1'H-spiro[pyran-1,4'-quinoline] (4c)<sup>S1</sup>**

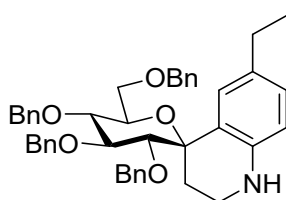

Compound **1a** (0.09 mmol, 51 mg) was treated according to the aforementioned method to give the yellow oil **4c** (45.8 mg, 76%):  $[\alpha]_D^{25} +20.5$  (*c* 0.34, CHCl<sub>3</sub>); <sup>1</sup>H NMR (CDCl<sub>3</sub>, 400 MHz)  $\delta$  7.34-7.17 (m, 19H), 6.99-6.96 (m, 2H), 6.90 (dd, *J* = 2.0 Hz, *J* = 8.0 Hz, 1H), 6.51 (d, *J* = 8.0 Hz, 1H), 4.91 (d, *J* = 10.8 Hz, 1H), 4.89 (d, *J* = 10.0 Hz, 1H), 4.85 (d, *J* = 10.8 Hz, 1H), 4.67 (d, *J* = 12.0 Hz, 1H), 4.65 (d, *J* = 10.6 Hz, 1H), 4.51 (d, *J* = 12.0 Hz, 1H), 4.38 (d, *J* = 10.6 Hz, 1H), 4.03 (d, *J* = 10.6 Hz, 1H), 3.98 (d,

$J = 9.4$  Hz, 1H), 3.90-3.76 (m, 4H), 3.69 (dd,  $J = 10.8$  Hz,  $J = 1.6$  Hz, 1H), 3.44-3.38 (m, 1H), 3.21-3.15 (m, 1H), 2.52 (q,  $J = 7.6$  Hz, 2H), 2.48-2.39 (m, 1H), 2.16-2.10 (m, 1H), 1.15 (t,  $J = 7.6$  Hz, 3H);  $^{13}\text{C}$  NMR ( $\text{CDCl}_3$ , 100 MHz)  $\delta$  144.2, 138.7, 138.6, 138.3, 138.3, 133.4, 128.4, 128.4, 128.3, 128.3, 128.3, 128.2, 128.2, 128.0, 128.0, 128.0, 128.0, 127.9, 127.9, 127.7, 127.7, 127.7, 127.5, 127.4, 127.4, 127.3, 127.3, 126.8, 123.5, 115.2, 85.8, 83.5, 79.0, 75.6, 75.1, 74.8, 74.4, 73.3, 72.3, 69.4, 38.6, 28.2, 26.4, 16.0; HRMS (EI):  $m/z$  calcd for  $\text{C}_{44}\text{H}_{47}\text{NO}_5$  ( $\text{M}^+$ ) 669.3454, found 669.3445.

**(1*S*,2*R*,3*S*,4*R*,5*R*)-2,3,4-tris(benzyloxy)-5-((benzyloxy)methyl)-6'-isopropyl-2',2',3',3,4,5-hexahydro-1'H-spiro[pyran-1,4'-quinoline] (4d)<sup>S1</sup>**

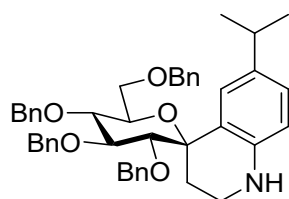

Compound **1a** (0.09 mmol, 51 mg) was treated according to the aforementioned method to give the yellow oil **4d** (46.0 mg, 75%):  $[\alpha]_{\text{D}}^{25} +29.2$  ( $c$  0.22,  $\text{CHCl}_3$ );  $^1\text{H}$  NMR ( $\text{CDCl}_3$ , 400 MHz)  $\delta$  7.36-7.18 (m, 19H), 6.98-6.92 (m, 3H), 6.52 (d,  $J = 8.2$  Hz, 1H), 4.92 (d,  $J = 10.8$  Hz, 1H), 4.91 (d,  $J = 10.8$  Hz, 1H), 4.85 (d,  $J = 10.8$  Hz, 1H), 4.69 (d,  $J = 12.0$  Hz, 1H), 4.68 (d,  $J = 10.8$  Hz, 1H), 4.51 (d,  $J = 12.0$  Hz, 1H), 4.39 (d,  $J = 10.4$  Hz, 1H), 4.01 (d,  $J = 10.4$  Hz, 1H), 4.00 (d,  $J = 6.8$  Hz, 1H), 3.90-3.83 (m, 3H), 3.79-3.76 (m, 1H), 3.70 (d,  $J = 10.4$  Hz, 1H), 3.43-3.37 (m, 1H), 3.21-3.15 (m, 1H), 2.81-2.74 (m, 1H), 2.45-2.39 (m, 1H), 2.17-2.10 (m, 1H), 1.17 (d,  $J = 6.8$  Hz, 3H), 1.16 (d,  $J = 6.8$  Hz, 3H);  $^{13}\text{C}$  NMR ( $\text{CDCl}_3$ , 100 MHz)  $\delta$  144.3, 138.7, 138.7, 138.4, 138.3, 138.1, 128.4, 128.4, 128.4, 128.3, 128.2, 128.2, 128.1, 128.0, 128.0, 128.0, 127.9, 127.9, 127.8, 127.8, 127.7, 127.5, 127.4, 127.4, 127.3, 127.3, 126.9, 125.3, 123.3, 115.1, 85.9, 83.5, 79.0, 75.6, 75.2, 74.9, 74.4, 73.3, 72.4, 69.4, 38.6, 33.4, 26.3, 24.4,

24.1; HRMS (EI):  $m/z$  calcd for  $C_{45}H_{49}NO_5$  ( $M^+$ ) 683.3611, found 683.3614.

**(1*S*,2*R*,3*S*,4*R*,5*R*)-2,3,4-tris(benzyloxy)-5-((benzyloxy)methyl)-6'-(tert-butyl)-2',2,3',3,4,5-hexahydro-1'H-spiro[pyran-1,4'-quinoline] (4e)<sup>S1</sup>**

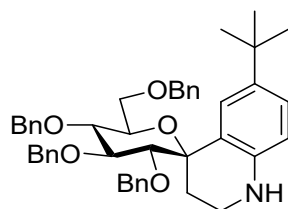

Compound **1a** (0.09 mmol, 51 mg) was treated according to the aforementioned method to give the yellow oil **4e** (51.0 mg, 60%):  $[\alpha]_D^{25} +39.5$  ( $c$  0.23,  $CHCl_3$ );  $^1H$  NMR ( $CDCl_3$ , 400 MHz)  $\delta$  7.53 (d,  $J = 2.4$  Hz, 1H), 7.33-7.18 (m, 18H), 7.10 (dd,  $J = 2.0$  Hz,  $J = 8.4$  Hz, 1H), 6.98-6.96 (m, 2H), 6.53 (d,  $J = 8.4$  Hz, 1H), 4.91 (d,  $J = 10.8$  Hz, 2H), 4.85 (d,  $J = 10.4$  Hz, 1H), 4.70 (d,  $J = 10.8$  Hz, 2H), 4.51 (d,  $J = 12.0$  Hz, 1H), 4.40 (d,  $J = 10.4$  Hz, 1H), 4.00-3.98 (m, 2H), 3.95-3.85 (m, 3H), 3.79-3.77 (m, 1H), 3.70 (m, 1H), 3.43-3.38 (m, 1H), 3.22-3.16 (m, 1H), 2.46-2.39 (m, 1H), 2.18-2.11 (m, 1H), 1.24 (s, 9H);  $^{13}C$  NMR ( $CDCl_3$ , 100 MHz)  $\delta$  143.9, 140.3, 138.7, 138.6, 138.4, 138.3, 128.4, 128.4, 128.4, 128.4, 128.2, 128.2, 128.1, 128.1, 128.0, 128.0, 127.9, 127.9, 127.9, 127.7, 127.6, 127.3, 127.3, 127.3, 127.2, 125.8, 124.2, 122.8, 114.9, 86.0, 83.5, 79.0, 75.7, 75.2, 74.9, 74.5, 73.3, 72.5, 69.3, 38.6, 34.0, 31.5, 31.5, 31.5, 26.33; HRMS (EI):  $m/z$  calcd for  $C_{46}H_{51}NO_5$  ( $M^+$ ) 697.3767, found 697.3773.

**(1*S*,2*R*,3*S*,4*R*,5*R*)-6'-benzyl-2,3,4-tris(benzyloxy)-5-((benzyloxy)methyl)-2',2,3',3,4,5-hexahydro-1'H-spiro[pyran-1,4'-quinoline] (4f)**

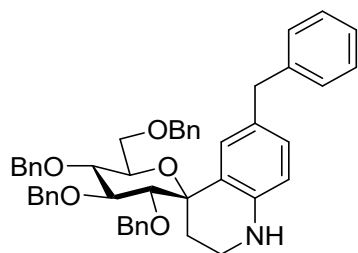

Compound **1a** (0.09 mmol, 51 mg) was treated according to the aforementioned method to give the yellow oil **4e** (51.0 mg, 65%):  $[\alpha]_D^{25} -29.0$  (*c* 0.21,  $\text{CHCl}_3$ );  $^1\text{H NMR}$  ( $\text{CDCl}_3$ , 400 MHz)  $\delta$  7.34-7.08 (m, 24H), 6.96-6.93 (m, 2H), 6.88 (dd,  $J = 1.6$  Hz,  $J = 8.0$  Hz, 1H), 6.50 (d,  $J = 8.0$  Hz, 1H), 4.89 (d,  $J = 10.8$  Hz, 1H), 4.88 (d,  $J = 10.8$  Hz, 1H), 4.82 (d,  $J = 10.8$  Hz, 1H), 4.63 (d,  $J = 12.0$  Hz, 2H), 4.49 (d,  $J = 12.0$  Hz, 1H), 4.34 (d,  $J = 10.8$  Hz, 1H), 3.97 (d,  $J = 10.8$  Hz, 1H), 3.93-3.77 (m, 7H), 3.68 (d,  $J = 10.0$  Hz, 1H), 3.43-3.37 (m, 1H), 3.22-3.17 (m, 1H), 2.47-2.37 (m, 1H), 2.17-2.11 (m, 1H);  $^{13}\text{C NMR}$  ( $\text{CDCl}_3$ , 100 MHz)  $\delta$  144.5, 142.1, 138.6, 138.6, 138.4, 138.2, 130.0, 129.5, 128.6, 128.6, 128.4, 128.4, 128.3, 128.3, 128.2, 128.2, 128.2, 128.2, 128.1, 128.0, 128.0, 128.0, 128.0, 127.8, 127.8, 127.7, 127.7, 127.7, 127.5, 127.5, 127.5, 127.3, 127.3, 125.7, 123.4, 115.3, 85.6, 83.5, 79.0, 75.6, 75.1, 74.9, 74.3, 73.3, 72.3, 69.4, 41.3, 38.4, 26.1; HRMS (EI):  $m/z$  calcd for  $\text{C}_{49}\text{H}_{49}\text{NO}_5$  ( $\text{M}^+$ ) 731.3611, found 731.3613.

**(1*S*,2*R*,3*S*,4*R*,5*R*)-2,3,4-tris(benzyloxy)-5-((benzyloxy)methyl)-6'-fluoro-2',2',3',3,4,5-hexahydro-1'H-spiro[pyran-1,4'-quinoline] (4g)<sup>S1</sup>**

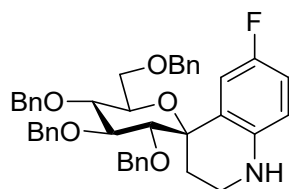

Compound **1a** (0.09 mmol, 51 mg) was treated according to the aforementioned method to give the yellow oil **4g** (46.8 mg, 79%):  $[\alpha]_D^{25} +42.7$  (*c* 0.25,  $\text{CHCl}_3$ );  $^1\text{H NMR}$  ( $\text{CDCl}_3$ , 400 MHz)  $\delta$  7.35-7.19 (m, 19H), 6.98 (m, 2H), 6.82-6.78 (m, 1H), 6.51-6.47

(m, 1H), 4.91 (d,  $J = 11.2$  Hz, 1H), 4.87 (d,  $J = 11.2$  Hz, 1H), 4.84 (d,  $J = 11.2$  Hz, 1H), 4.62 (m, 2H), 4.52 (d,  $J = 12.0$  Hz, 1H), 4.45 (d,  $J = 10.4$  Hz, 1H), 4.08 (d,  $J = 10.4$  Hz, 1H), 3.88-3.82 (m, 3H), 3.78-3.76 (m, 2H), 3.68 (d,  $J = 10.4$  Hz, 1H), 3.48-3.44 (m, 1H), 3.19-3.14 (m, 1H), 2.46-2.41 (m, 1H), 2.11-2.06 (m, 1H);  $^{13}\text{C}$  NMR ( $\text{CDCl}_3$ , 100 MHz)  $\delta$  155.7 (d,  $J = 233.4$  Hz), 142.6, 138.6, 138.4, 138.2, 138.1, 128.4, 128.4, 128.3, 128.3, 128.3, 128.3, 128.1, 128.1, 128.0, 127.9, 127.8, 127.8, 127.7, 127.6, 127.6, 127.6, 127.6, 127.5, 127.4, 127.4, 124.7 (d,  $J = 5.8$  Hz), 115.9 (d,  $J = 22.4$  Hz), 115.8 (d,  $J = 5.8$  Hz), 113.7 (d,  $J = 22.4$  Hz), 85.9, 83.4, 78.9, 75.5, 75.1, 75.0, 74.2, 73.3, 72.5, 69.5, 38.7, 26.3; HRMS (EI):  $m/z$  calcd for  $\text{C}_{42}\text{H}_{42}\text{FNO}_5$  ( $\text{M}^+$ ) 659.3047, found 659.3054.

**(1*S*,2*R*,3*S*,4*R*,5*R*)-2,3,4-tris(benzyloxy)-5-((benzyloxy)methyl)-6'-chloro-2',2,3',3,4,5-hexahydro-1'H-spiro[pyran-1,4'-quinoline] (4h)**

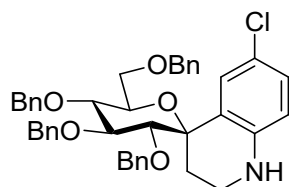

Compound **1a** (0.09 mmol, 51 mg) was treated according to the aforementioned method to give the yellow oil **4h** (42.5 mg, 70%):  $[\alpha]_{\text{D}}^{25} +19.5$  ( $c$  0.24,  $\text{CHCl}_3$ );  $^1\text{H}$  NMR ( $\text{CDCl}_3$ , 400 MHz)  $\delta$  7.43 (d,  $J = 2.4$  Hz, 1H), 7.33-7.25 (m, 14H), 7.19 (m, 4H), 7.01-6.99 (m, 3H), 6.47 (d,  $J = 8.6$  Hz, 1H), 4.91 (d,  $J = 11.2$  Hz, 1H), 4.86 (d,  $J = 10.8$  Hz, 1H), 4.85 (d,  $J = 11.2$  Hz, 1H), 4.63 (d,  $J = 12.0$  Hz, 1H), 4.61 (d,  $J = 10.8$  Hz, 1H), 4.52 (d,  $J = 12.0$  Hz, 1H), 4.46 (d,  $J = 10.4$  Hz, 1H), 4.09 (d,  $J = 10.4$  Hz, 1H), 3.86-3.84 (m, 2H), 3.80-3.76 (m, 3H), 3.69-3.67 (m, 1H), 3.51-3.46 (m, 1H), 3.19 (m, 1H), 2.46-2.41 (m, 1H), 2.10-2.05 (m, 1H);  $^{13}\text{C}$  NMR ( $\text{CDCl}_3$ , 100 MHz)  $\delta$  144.6, 138.7, 138.4, 138.1, 138.0, 128.7, 128.4, 128.4, 128.3, 128.3, 128.3, 128.3, 128.3, 128.1,

128.1, 128.0, 128.0, 127.8, 127.8, 127.7, 127.6, 127.6, 127.5, 127.5, 127.4, 127.4, 127.4, 124.9, 122.0, 115.9, 85.8, 83.4, 78.9, 75.5, 75.1, 75.0, 74.0, 73.3, 72.5, 69.4, 38.5, 26.3; HRMS (EI):  $m/z$  calcd for  $C_{42}H_{42}ClNO_5$  ( $M^+$ ) 675.2752, found 675.2759.

**(1*S*,2*R*,3*S*,4*R*,5*R*)-2,3,4-tris(benzyloxy)-5-((benzyloxy)methyl)-6'-bromo-2',2,3',3,4,5-hexahydro-1'H-spiro[pyran-1,4'-quinoline] (4i)**

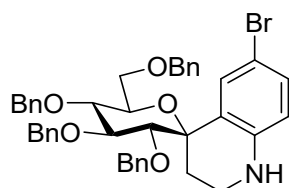

Compound **1a** (0.09 mmol, 51 mg) was treated according to the aforementioned method to give the yellow oil **4i** (47.2 mg, 73%):  $[\alpha]_D^{25} +6.6$  ( $c$  0.41,  $CHCl_3$ );  $^1H$  NMR ( $CDCl_3$ , 400 MHz)  $\delta$  7.57 (d,  $J = 2.0$  Hz, 1H), 7.35-7.18 (m, 18H), 7.14-7.11 (m, 1H), 7.00-6.97 (m, 2H), 6.41 (d,  $J = 8.4$  Hz, 1H), 4.91 (d,  $J = 11.2$  Hz, 1H), 4.86 (d,  $J = 10.8$  Hz, 1H), 4.84 (d,  $J = 10.8$  Hz, 1H), 4.62 (d,  $J = 12.0$  Hz, 1H), 4.61 (d,  $J = 10.8$  Hz, 1H), 4.52 (d,  $J = 12.0$  Hz, 1H), 4.45 (d,  $J = 10.8$  Hz, 1H), 4.09 (d,  $J = 10.8$  Hz, 1H), 3.87-3.86 (m, 2H), 3.78-3.76 (m, 3H), 3.68 (m, 1H), 3.51-3.45 (m, 1H), 3.21-3.15 (m, 1H), 2.46-2.40 (m, 1H), 2.10-2.03 (m, 1H);  $^{13}C$  NMR ( $CDCl_3$ , 100 MHz)  $\delta$  145.0, 138.7, 138.4, 138.1, 138.0, 131.4, 130.3, 128.4, 128.4, 128.3, 128.3, 128.3, 128.3, 128.1, 128.1, 128.0, 128.0, 127.9, 127.9, 127.7, 127.6, 127.6, 127.5, 127.5, 127.5, 127.5, 127.4, 125.4, 116.3, 109.0, 85.8, 83.3, 78.9, 75.4, 75.1, 75.0, 73.9, 73.3, 72.5, 69.4, 38.4, 26.2; HRMS (EI):  $m/z$  calcd for  $C_{42}H_{42}BrNO_5$  ( $M^+$ ) 719.2246, found 719.2248.

**(1*S*,2*R*,3*S*,4*R*,5*R*)-ethyl-2,3,4-tris(benzyloxy)-6-((benzyloxy)methyl)-2',2,3',3,4,5-hexahydro-1'H-spiro[pyran-1,4'-quinoline]-6'-carboxylate (4j)**

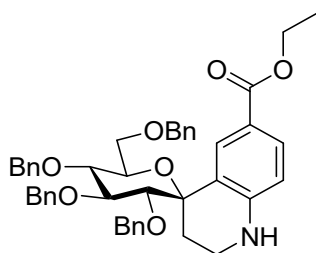

Compound **1a** (0.09 mmol, 51 mg) was treated according to the aforementioned method to give the yellow oil **4j** (44.3 mg, 69%):  $[\alpha]_D^{25} +18.2$  (*c* 0.17, CHCl<sub>3</sub>); <sup>1</sup>H NMR (CDCl<sub>3</sub>, 400 MHz)  $\delta$  8.2 (d, *J* = 2.0 Hz, 1H), 7.75 (dd, *J* = 2.0 Hz, *J* = 8.4 Hz, 1H), 7.35-7.16 (m, 18H), 6.98-6.95 (m, 2H), 6.49 (d, *J* = 8.4 Hz, 1H), 4.92 (d, *J* = 10.8 Hz, 1H), 4.88 (d, *J* = 10.8 Hz, 1H), 4.87 (d, *J* = 10.6 Hz, 1H), 4.64 (d, *J* = 12.0 Hz, 1H), 4.63 (d, *J* = 10.6 Hz, 1H), 4.53 (d, *J* = 12.0 Hz, 1H), 4.51 (d, *J* = 10.6 Hz, 1H), 4.39 (brs, 1H), 4.28 (q, *J* = 7.2, 1H), 4.11 (d, *J* = 10.6 Hz, 1H), 4.05 (d, *J* = 9.6 Hz, 1H), 3.92 (dd, *J* = 8.0 Hz, *J* = 9.6 Hz, 1H), 3.84-3.68 (m, 4H), 3.57-3.51 (m, 1H), 3.31-3.25 (m, 1H), 2.48-2.41 (m, 1H), 2.15-2.08 (m, 1H), 1.30 (t, *J* = 7.2 Hz, 3H); <sup>13</sup>C NMR (CDCl<sub>3</sub>, 100 MHz)  $\delta$  166.7, 149.6, 138.6, 138.5, 138.1, 138.1, 130.6, 129.8, 128.4, 128.4, 128.4, 128.4, 128.4, 128.2, 128.2, 128.1, 128.1, 128.0, 128.0, 127.8, 127.7, 127.7, 127.7, 127.7, 127.6, 127.6, 127.4, 127.3, 122.1, 118.7, 113.8, 85.4, 83.6, 79.1, 75.6, 75.3, 75.3, 73.9, 73.4, 72.6, 69.5, 60.1, 37.9, 25.7, 14.4; HRMS (EI): *m/z* calcd for C<sub>45</sub>H<sub>47</sub>NO<sub>7</sub> (M<sup>+</sup>) 713.3353, found 713.3349.

**(1S,2R,3S,4R,5R)-2,3,4-tris(benzyloxy)-5-((benzyloxy)methyl)-7'-methyl-2',2,3',3,4,5-hexahydro-1'H-spiro[pyran-1,4'-quinoline] (4k)<sup>S1</sup>**

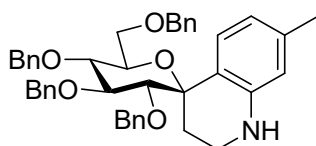

Compound **1a** (0.09 mmol, 51 mg) was treated according to the aforementioned method to give the yellow oil **4k** (47.8 mg, 81%):  $[\alpha]_D^{25} +20.0$  (*c* 0.19, CHCl<sub>3</sub>); <sup>1</sup>H NMR

(CDCl<sub>3</sub>, 400 MHz)  $\delta$  7.36-7.18 (m, 19H), 7.00 (m, 2H), 6.54 (d,  $J = 8.0$  Hz, 1H), 6.37 (brs, 1H), 4.90 (d,  $J = 10.0$  Hz, 1H), 4.88 (d,  $J = 8.8$  Hz, 1H), 4.83 (d,  $J = 11.2$  Hz, 1H), 4.70 (brs, 1H), 4.64 (d,  $J = 11.6$  Hz, 2H), 4.50 (d,  $J = 12.0$  Hz, 1H), 4.41 (d,  $J = 10.4$  Hz, 1H), 4.10 (d,  $J = 10.4$  Hz, 1H), 3.96 (d,  $J = 9.6$  Hz, 1H), 3.87 (dd,  $J = 8.8$  Hz,  $J = 9.6$  Hz, 1H), 3.83-3.74 (m, 3H), 3.68 (d,  $J = 10.4$  Hz, 1H), 3.43-3.39 (m, 1H), 3.22-3.17 (m, 1H), 2.47-2.39 (m, 1H), 2.22 (s, 3H), 2.16-2.09 (m, 1H); <sup>13</sup>C NMR (CDCl<sub>3</sub>, 100 MHz)  $\delta$  146.1, 138.7, 138.6, 138.5, 138.5, 138.3, 128.4, 128.3, 128.3, 128.3, 128.2, 128.2, 128.0, 128.0, 128.0, 128.0, 127.9, 127.9, 127.7, 127.7, 127.6, 127.6, 127.6, 127.6, 127.5, 127.3, 127.3, 120.8, 118.9, 115.4, 85.6, 83.6, 79.0, 75.6, 75.1, 74.9, 74.2, 73.4, 72.3, 69.6, 38.5, 26.3, 21.1; HRMS (EI):  $m/z$  calcd for C<sub>43</sub>H<sub>45</sub>NO<sub>5</sub> (M<sup>+</sup>) 655.3298, found 655.3291.

**(1*S*,2*R*,3*S*,4*R*,5*R*)-2,3,4-tris(benzyloxy)-5-((benzyloxy)methyl)-7'-chloro-2',2,3',3,4,5-hexahydro-1'H-spiro[pyran-1,4'-quinoline] (4I)**<sup>S1</sup>

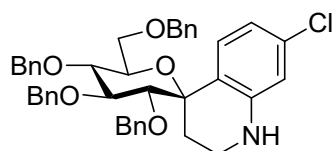

Compound **1a** (0.09 mmol, 51 mg) was treated according to the aforementioned method to give the yellow oil **4I** (48.6 mg, 80%):  $[\alpha]^{25}_D +29.2$  ( $c$  0.23, CHCl<sub>3</sub>); <sup>1</sup>H NMR (CDCl<sub>3</sub>, 400 MHz)  $\delta$  7.36-7.19 (m, 19H), 7.01-6.98 (m, 2H), 6.64 (dd,  $J = 2.0$  Hz,  $J = 8.4$  Hz, 1H), 6.52 (d,  $J = 2.0$  Hz, 1H), 4.92-4.83 (m, 3H), 4.63-4.60 (d,  $J = 12.0$  Hz, 2H), 4.50 (d,  $J = 12.0$  Hz, 1H), 4.46 (d,  $J = 10.8$  Hz, 1H), 4.11 (d,  $J = 10.8$  Hz, 1H), 4.00 (brs, 1H), 3.89-3.73 (m, 5H), 3.67 (m, 1H), 3.51-3.45 (m, 1H), 3.23-3.17 (m, 1H), 2.46-2.40 (m, 1H), 2.12-2.05 (m, 1H); <sup>13</sup>C NMR (CDCl<sub>3</sub>, 100 MHz)  $\delta$  147.0, 138.6, 138.4, 138.1, 138.1, 134.1, 128.9, 128.4, 128.4, 128.4, 128.4, 128.4, 128.3, 128.2, 128.1, 128.1, 127.9, 127.9, 127.8, 127.8, 127.7, 127.7, 127.7, 127.6, 127.5, 127.5,

127.4, 121.9, 117.5, 114.0, 85.7, 83.4, 78.9, 75.6, 75.18, 75.11, 73.9, 73.3, 72.4, 69.4, 38.3, 26.1; HRMS (EI):  $m/z$  calcd for  $C_{42}H_{42}ClNO_5$  ( $M^+$ ) 675.2752, found 675.2744.

**(1*S*,2*R*,3*S*,4*R*,5*R*)-2,3,4-tris(benzyloxy)-5-((benzyloxy)methyl)-8'-iodo-2',2,3',3,4,5-hexahydro-1'H-spiro[pyran-1,4'-quinoline] (4m)**

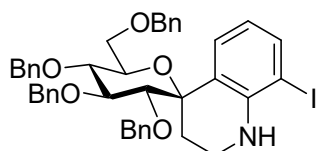

Compound **1a** (0.09 mmol, 51 mg) was treated according to the aforementioned method to give the yellow oil **4m** (55.2 mg, 80%):  $[\alpha]_D^{25} +68.4$  ( $c$  0.23,  $CHCl_3$ );  $^1H$  NMR ( $CDCl_3$ , 400 MHz)  $\delta$  7.58 (dd,  $J = 1.2$  Hz,  $J = 7.6$  Hz, 1H), 7.47 (d,  $J = 8.0$  Hz, 1H), 7.32-7.20 (m, 18H), 6.94-6.91 (m, 2H), 6.46 (d,  $J = 8.0$  Hz, 1H), 4.92 (d,  $J = 10.8$  Hz, 1H), 4.88 (d,  $J = 10.8$  Hz, 1H), 4.86 (d,  $J = 10.8$  Hz, 1H), 4.63 (d,  $J = 12.0$  Hz, 2H), 4.51 (d,  $J = 12.0$  Hz, 1H), 4.46 (d,  $J = 10.4$  Hz,  $CH_2Ph$ , 2H), 3.98 (d,  $J = 10.4$  Hz, 1H), 3.90-3.88 (m, 2H), 3.81-3.75 (m, 3H), 3.69-3.67 (m, 1H), 3.58-3.53 (m, 1H), 3.27-3.24 (m, 1H), 2.47-2.41 (m, 1H), 2.11-2.04 (m, 1H);  $^{13}C$  NMR ( $CDCl_3$ , 100 MHz)  $\delta$  145.2, 138.6, 138.6, 138.4, 138.1, 138.0, 128.4, 128.4, 128.4, 128.3, 128.3, 128.3, 128.2, 128.2, 128.2, 128.0, 128.0, 128.0, 127.9, 127.8, 127.7, 127.7, 127.6, 127.6, 127.5, 127.5, 127.4, 124.4, 118.5, 86.3, 84.9, 83.4, 78.9, 75.6, 75.3, 75.1, 74.4, 73.4, 72.6, 69.4, 38.6, 26.3; HRMS (EI):  $m/z$  calcd for  $C_{42}H_{42}INO_5$  ( $M^+$ ) 767.2108, found 767.2115.

**(1*S*,2*R*,3*S*,4*S*,5*R*)-2,3,4-tris(benzyloxy)-5-((benzyloxy)methyl)-2',2,3',3,4,5-hexahydro-1'H-spiro[pyran-1,4'-quinoline] (4n)<sup>S1</sup>**

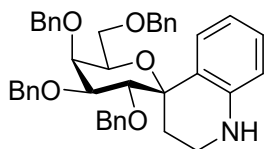

Compound **1b** (0.09 mmol, 51 mg) was treated according to the aforementioned method to give the yellow oil **4n** (44.4 mg, 77%):  $[\alpha]_D^{25} +28.9$  (*c* 0.44, CHCl<sub>3</sub>); <sup>1</sup>H NMR (CDCl<sub>3</sub>, 400 MHz)  $\delta$  7.53 (dd, *J* = 1.2 Hz, *J* = 8.0 Hz, 1H), 7.41-7.24 (m, 15H), 7.17-7.14 (m, 3H), 7.05-7.01 (m, 1H), 6.99-6.96 (m, 2H), 6.72-6.68 (m, 1H), 6.53 (dd, *J* = 1.2 Hz, *J* = 8.0 Hz, 1H), 5.05 (d, *J* = 11.6 Hz, 1H), 4.75 (brs, 2H), 4.65 (d, *J* = 11.6 Hz, 1H), 4.50 (d, *J* = 10.0 Hz, 1H), 4.49 (m, 1H), 4.43 (d, *J* = 11.6 Hz, 1H), 4.38 (d, *J* = 11.6 Hz, 1H), 4.10-4.07 (m, 2H), 3.88-3.84 (m, 1H), 3.75 (dd, *J* = 2.8 Hz, *J* = 10.0 Hz, 1H), 3.70 (dd, *J* = 8.0 Hz, *J* = 8.8 Hz, 1H), 3.51 (dd, *J* = 4.8 Hz, *J* = 8.8 Hz, 1H), 3.36-3.30 (m, 1H), 3.19-3.13 (m, 1H), 2.43-2.36 (m, 1H), 2.11-2.05 (m, 1H); <sup>13</sup>C NMR (CDCl<sub>3</sub>, 100 MHz)  $\delta$  146.2, 139.3, 138.7, 138.7, 137.9, 128.6, 128.3, 128.3, 128.2, 128.2, 128.1, 128.1, 127.9, 127.9, 127.9, 127.9, 127.9, 127.9, 127.9, 127.9, 127.9, 127.7, 127.4, 127.4, 127.3, 127.3, 127.3, 127.2, 127.1, 124.1, 117.9, 114.9, 81.7, 80.8, 75.2, 75.1, 75.0, 74.5, 73.5, 72.5, 70.4, 69.1, 38.6, 25.4; HRMS (EI): *m/z* calcd for C<sub>42</sub>H<sub>43</sub>NO<sub>5</sub> (M<sup>+</sup>) 641.3141, found 641.3151.

**(1S,2R,3S,4S,5R)-2,3,4-tris(benzyloxy)-5-((benzyloxy)methyl)-6'-methyl-2',2,3',3,4,5-hexahydro-1'H-spiro[pyran-1,4'-quinoline] (4o)<sup>S1</sup>**

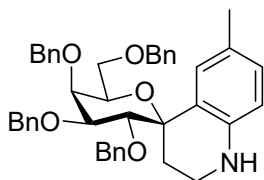

Compound **1b** (0.09 mmol, 51 mg) was treated according to the aforementioned method to give the yellow oil **4o** (37.7 mg, 64%):  $[\alpha]_D^{25} +11.5$  (*c* 0.31, CHCl<sub>3</sub>); <sup>1</sup>H NMR (CDCl<sub>3</sub>, 400 MHz)  $\delta$  7.43-7.41 (m, 2H), 7.37-7.24 (m, 14H), 7.17-7.15 (m, 3H), 7.00-6.97 (m, 2H), 6.84 (dd, *J* = 1.6 Hz, *J* = 8.0 Hz, 1H), 6.47 (d, *J* = 8.0 Hz, 1H), 5.08 (d, *J*

= 11.6 Hz, 1H), 4.75 (brs, 2H), 4.66 (d,  $J = 11.6$  Hz, 1H), 4.51-4.37 (m, 4H), 4.11-4.09 (m, 2H), 3.86-3.83 (m, 1H), 3.76-3.68 (m, 2H), 3.51 (dd,  $J = 4.8$  Hz,  $J = 8.8$  Hz, 1H), 3.33-3.27 (m, 1H), 3.16-3.10 (m, 1H), 2.42-2.36 (m, 1H), 2.19 (s, 3H), 2.09-2.03 (m, 1H);  $^{13}\text{C}$  NMR ( $\text{CDCl}_3$ , 100 MHz)  $\delta$  144.0, 139.5, 138.8, 138.6, 137.9, 129.4, 128.5, 128.3, 128.3, 128.2, 128.2, 128.1, 128.1, 128.0, 128.0, 127.9, 127.9, 127.9, 127.9, 127.7, 127.3, 127.3, 127.3, 127.2, 127.2, 127.1, 127.1, 126.9, 124.1, 115.1, 81.5, 80.9, 75.1, 75.0, 74.9, 74.2, 73.5, 72.5, 70.3, 69.1, 38.8, 25.6, 20.7; HRMS (EI):  $m/z$  calcd for  $\text{C}_{43}\text{H}_{45}\text{NO}_5$  ( $\text{M}^+$ ) 655.3298, found 655.3304.

**(1*S*,2*R*,3*S*,4*S*,5*R*)-2,3,4-tris(benzyloxy)-5-((benzyloxy)methyl)-6'-ethyl-2',2,3',3,4,5-hexahydro-1'H-spiro[pyran-1,4'-quinoline] (4p)<sup>S1</sup>**

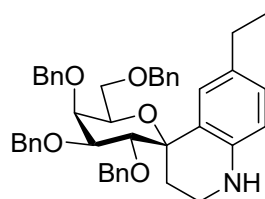

Compound **1b** (0.09 mmol, 51 mg) was treated according to the aforementioned method to give the yellow oil **4p** (39.1 mg, 65%):  $[\alpha]_{\text{D}}^{25} +22.8$  ( $c$  0.24,  $\text{CHCl}_3$ );  $^1\text{H}$  NMR ( $\text{CDCl}_3$ , 400 MHz)  $\delta$  7.43-7.24 (m, 16H), 7.16-7.15 (m, 3H), 6.98-6.96 (m, 2H), 6.88 (dd,  $J = 1.6$  Hz,  $J = 8.0$  Hz, 1H), 6.49 (dd,  $J = 8.0$  Hz, 1H), 5.09 (d,  $J = 12.0$  Hz, 1H), 4.76 (brs, 2H), 4.66 (d,  $J = 12.0$  Hz, 1H), 4.53 (d,  $J = 10.0$  Hz, 1H), 4.47-4.37 (m, 3H), 4.10-4.06 (m, 2H), 3.87-3.84 (m, 1H), 3.76-3.68 (m, 2H), 3.51 (dd,  $J = 4.8$  Hz,  $J = 8.8$  Hz, 1H), 3.32-3.27 (m, 1H), 3.17-3.12 (m, 1H), 2.54-2.46 (m, 2H), 2.42-2.35 (m, 1H), 2.10-2.04 (m, 1H), 1.15 (t,  $J = 7.6$  Hz, 3H);  $^{13}\text{C}$  NMR ( $\text{CDCl}_3$ , 100 MHz)  $\delta$  144.2, 139.5, 138.8, 138.7, 137.9, 133.5, 128.3, 128.3, 128.3, 128.2, 128.2, 128.1, 128.1, 127.9, 127.9, 127.9, 127.9, 127.9, 127.9, 127.9, 127.7, 127.3, 127.3, 127.2, 127.1,

127.1, 127.1, 127.0, 124.1, 115.1, 81.7, 80.8, 75.2, 75.0, 74.9, 74.2, 73.5, 72.5, 70.3, 69.0, 38.7, 28.1, 25.4, 15.7; HRMS (EI):  $m/z$  calcd for  $C_{44}H_{47}NO_5$  ( $M^+$ ) 669.3454, found 669.3458.

**(1*S*,2*R*,3*S*,4*S*,5*R*)-2,3,4-tris(benzyloxy)-5-((benzyloxy)methyl)-6'-isopropyl-2',2,3',3,4,5-hexahydro-1'H-spiro[pyran-1,4'-quinoline] (4q)**

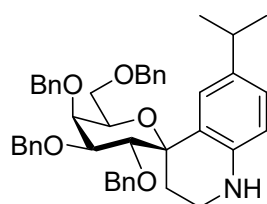

Compound **1b** (0.09 mmol, 51 mg) was treated according to the aforementioned method to give the yellow oil **4q** (41.2 mg, 67%):  $[\alpha]_D^{25}$  -6.2 ( $c$  0.28  $HCl_3$ )  $^1H$  NMR ( $CDCl_3$ , 400 MHz)  $\delta$  7.45-7.15 (m, 19H), 6.96-6.91 (m, 3H), 6.51 (d,  $J$  = 8.0 Hz, 1H), 5.10 (d,  $J$  = 11.6 Hz, 1H), 4.76 (brs, 2H), 4.65 (d,  $J$  = 11.6 Hz, 1H), 4.55 (d,  $J$  = 10.0 Hz, 1H), 4.47-4.38 (m, 3H), 4.10 (brs, 1H), 4.03 (d,  $J$  = 10.4 Hz, 1H), 3.88-3.85 (m, 1H), 3.75-3.69 (m, 2H), 3.54-3.51 (m, 1H), 3.29-3.27 (m, 1H), 3.17-3.12 (m, 1H), 2.81-2.74 (m, 1H), 2.41-2.35 (m, 1H), 2.10-2.06 (m, 1H), 1.17 (d,  $J$  = 6.8 Hz, 6H);  $^{13}C$  NMR ( $CDCl_3$ , 100 MHz)  $\delta$  144.3, 139.6, 138.8, 138.7, 138.2, 137.9, 128.3, 128.3, 128.3, 128.3, 128.2, 128.1, 128.1, 127.9, 127.9, 127.9, 127.9, 127.9, 127.7, 127.3, 127.3, 127.3, 127.3, 127.1, 127.0, 126.9, 126.9, 126.8, 125.9, 123.9, 115.1, 81.9, 80.8, 75.2, 75.1, 75.0, 74.1, 73.5, 72.5, 70.3, 69.0, 38.7, 33.3, 25.4, 24.3, 23.9; HRMS (EI):  $m/z$  calcd for  $C_{45}H_{49}NO_5$  ( $M^+$ ) 683.3611, found 683.3614.

**(1*S*,2*R*,3*S*,4*S*,5*R*)-6'-benzyl-3,4,5-tris(benzyloxy)-5-((benzyloxy)methyl)-2',2,3',3,4,5-hexahydro-1'H-spiro[pyran-1,4'-quinoline] (4r)**

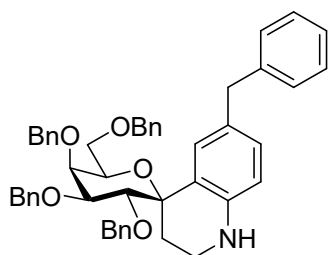

Compound **1b** (0.09 mmol, 51 mg) was treated according to the aforementioned method to give the yellow oil **4r** (43.6 mg, 80%):  $[\alpha]_D^{25} -27.1$  (*c* 0.26,  $\text{CHCl}_3$ );  $^1\text{H}$  NMR ( $\text{CDCl}_3$ , 400 MHz)  $\delta$  7.41-7.39 (m, 3H), 7.35-7.25 (m, 13H), 7.19-7.08 (m, 8H), 6.95-6.93 (m, 2H), 6.83 (dd,  $J = 2.0$  Hz,  $J = 8.0$  Hz, 1H), 6.48 (d,  $J = 8.0$  Hz, 1H), 5.05 (d,  $J = 12.0$  Hz, 1H), 4.73 (brs, 2H), 4.64 (d,  $J = 12.0$  Hz, 1H), 4.47 (d,  $J = 10.0$  Hz, 1H), 4.43 (d,  $J = 12.0$  Hz, 1H), 4.42 (d,  $J = 10.8$  Hz, 1H), 4.38 (d,  $J = 11.6$  Hz, 1H), 4.07 (d,  $J = 2.8$  Hz, 1H), 3.98 (d,  $J = 10.8$  Hz, 1H), 3.88-3.79 (m, 3H), 3.73 (dd,  $J = 2.8$  Hz,  $J = 10.0$  Hz, 1H), 3.69 (dd,  $J = 8.4$  Hz,  $J = 8.8$  Hz, 1H), 3.51 (dd,  $J = 4.8$  Hz,  $J = 8.8$  Hz, 1H), 3.31-3.26 (m, 1H), 3.19-3.13 (m, 1H), 2.39-2.32 (m, 1H), 2.11-2.05 (m, 1H);  $^{13}\text{C}$  NMR ( $\text{CDCl}_3$ , 100 MHz)  $\delta$  144.5, 142.2, 139.4, 138.8, 138.7, 137.9, 130.1, 129.3, 128.7, 128.6, 128.6, 128.3, 128.3, 128.3, 128.2, 128.2, 128.1, 128.1, 128.1, 127.9, 127.9, 127.9, 127.7, 127.7, 127.7, 127.3, 127.3, 127.3, 127.3, 127.2, 127.1, 127.1, 125.6, 123.9, 115.3, 81.4, 80.8, 75.1, 75.1, 74.9, 74.3, 73.5, 72.5, 70.3, 69.0, 41.3, 38.5, 25.1; HRMS (EI):  $m/z$  calcd for  $\text{C}_{49}\text{H}_{49}\text{NO}_5$  ( $\text{M}^+$ ) 731.3611, found 731.3607.

**(1S,2R,3S,4S,5R)-2,3,4-tris(benzyloxy)-5-((benzyloxy)methyl)-6'-fluoro-2',2,3',3,4,5-hexahydro-1'H-spiro[pyran-1,4'-quinoline] (4s)<sup>S1</sup>**

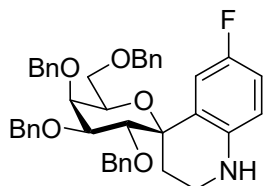

Compound **1b** (0.09 mmol, 51 mg) was treated according to the aforementioned method to give the yellow oil **4s** (48.1 mg, 81%):  $[\alpha]_D^{25} +15.4$  (*c* 0.61,  $\text{CHCl}_3$ );  $^1\text{H}$  NMR ( $\text{CDCl}_3$ , 400 MHz)  $\delta$  7.40-7.16 (m, 19H), 7.00-6.98 (m, 2H), 6.79-6.74 (m, 1H), 6.46

(dd,  $J = 4.8$  Hz,  $J = 8.8$  Hz, 1H), 5.04 (d,  $J = 11.8$  Hz, 1H), 4.74 (brs, 2H), 4.64 (d,  $J = 11.8$  Hz, 1H), 4.53 (d,  $J = 10.8$  Hz, 1H), 4.45-4.37 (m, 3H), 4.12 (d,  $J = 10.8$  Hz, 1H), 4.06 (d,  $J = 2.8$  Hz, 1H), 3.85-3.82 (m, 1H), 3.74 (dd,  $J = 2.8$  Hz,  $J = 10.0$  Hz, 1H), 3.68 (dd,  $J = 8.4$  Hz,  $J = 8.8$  Hz, 1H), 3.50 (dd,  $J = 5.2$  Hz,  $J = 8.8$  Hz, 1H), 3.36-3.31 (m, 1H), 3.15-3.09 (m, 1H), 2.42-2.35 (m, 1H), 2.07-2.01 (m, 1H);  $^{13}\text{C}$  NMR ( $\text{CDCl}_3$ , 100 MHz)  $\delta$  155.8 (d,  $J = 233.2$  Hz), 142.6, 139.2, 138.6, 138.4, 137.9, 128.3, 128.3, 128.3, 128.3, 128.2, 128.2, 128.0, 128.0, 127.9, 127.9, 127.9, 127.8, 127.7, 127.4, 127.4, 127.4, 127.3, 127.3, 127.3, 127.2, 125.3 (d,  $J = 6.1$  Hz), 115.8 (d,  $J = 11.6$  Hz), 115.8 (d,  $J = 3.6$  Hz), 114.2 (d,  $J = 22.4$  Hz), 81.6, 80.7, 75.2, 75.0, 74.9, 74.5, 73.5, 72.5, 70.6, 69.0, 38.9, 25.5; HRMS (EI):  $m/z$  calcd for  $\text{C}_{42}\text{H}_{42}\text{FNO}_5$  ( $\text{M}^+$ ) 659.3047, found 659.3043.

**(1*S*,2*R*,3*S*,4*S*,5*R*)-2,3,4-tris(benzyloxy)-5-((benzyloxy)methyl)-6'-chloro-2',2,3',3,4,5-hexahydro-1'H-spiro[pyran-1,4'-quinoline] (4t)<sup>S1</sup>**

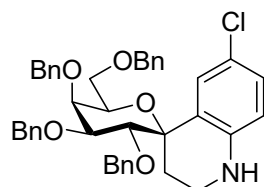

Compound **1b** (0.09 mmol, 51 mg) was treated according to the aforementioned method to give the yellow oil **4t** (45.0 mg, 74%):  $[\alpha]_{\text{D}}^{25} -15.0$  ( $c$  0.42,  $\text{CHCl}_3$ );  $^1\text{H}$  NMR ( $\text{CDCl}_3$ , 400 MHz)  $\delta$  7.48 (d,  $J = 2.4$  Hz, 1H), 7.41-7.24 (m, 15H), 7.19-7.17 (m, 3H), 7.01-6.96 (m, 3H), 6.45 (d,  $J = 8.4$  Hz, 1H), 5.05 (d,  $J = 12.0$  Hz, 1H), 4.74 (brs, 2H), 4.65 (d,  $J = 12.0$  Hz, 1H), 4.54 (d,  $J = 10.8$  Hz, 1H), 4.44-4.37 (m, 3H), 4.13 (d,  $J = 10.8$  Hz, 1H), 4.06 (d,  $J = 2.8$  Hz, 1H), 3.92 (brs, 1H), 3.84-3.81 (m, 1H), 3.64 (dd,  $J = 2.8$  Hz,  $J = 10.0$  Hz, 1H), 3.67 (dd,  $J = 8.0$  Hz,  $J = 8.8$  Hz, 1H), 3.50 (dd,  $J = 5.2$  Hz,  $J = 8.8$  Hz, 1H), 3.39-3.34 (m, 1H), 3.17-3.11 (m, 1H), 2.42-2.35 (m, 1H), 2.05-2.00 (m, 1H);  $^{13}\text{C}$

NMR (CDCl<sub>3</sub>, 100 MHz)  $\delta$  144.7, 139.2, 138.6, 138.4, 137.9, 128.6, 128.3, 128.3, 128.3, 128.3, 128.2, 128.2, 128.0, 128.0, 128.0, 127.9, 127.9, 127.9, 127.9, 127.9, 127.7, 127.4, 127.4, 127.4, 127.3, 127.3, 127.2, 125.5, 122.2, 116.0, 81.6, 80.7, 75.2, 74.8, 74.7, 74.3, 73.5, 72.5, 70.7, 69.0, 38.6, 25.4; HRMS (EI):  $m/z$  calcd for C<sub>42</sub>H<sub>42</sub>ClNO<sub>5</sub> (M<sup>+</sup>) 675.2752, found 675.2744.

**(1*S*,2*R*,3*S*,4*S*,5*R*)-2,3,4-tris(benzyloxy)-5-((benzyloxy)methyl)-6'-nitro-2',2,3',3,4,5-hexahydro-1'H-spiro[pyran-1,4'-quinoline] (4u)**

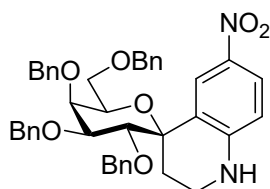

Compound **1b** (0.09 mmol, 51 mg) was treated according to the aforementioned method to give the yellow oil **4u** (55.6 mg, 90%):  $[\alpha]_D^{25}$  -36.0 (c 0.60, CHCl<sub>3</sub>); <sup>1</sup>H NMR (CDCl<sub>3</sub>, 400 MHz)  $\delta$  8.39 (d,  $J$  = 2.4 Hz, 1H), 7.89 (dd,  $J$  = 2.4 Hz,  $J$  = 9.2 Hz, 1H), 7.43-7.23 (m, 15H), 7.17-7.10 (m, 3H), 6.96-6.93 (m, 2H), 6.39 (d,  $J$  = 9.2 Hz, 1H), 5.07 (d,  $J$  = 12.0 Hz, 1H), 4.79 (d,  $J$  = 11.6 Hz, 1H), 4.74-4.71 (m, 2H), 4.69-4.65 (m, 2H), 4.50 (d,  $J$  = 10.0 Hz, 1H), 4.41 (d,  $J$  = 11.6 Hz, 1H), 4.37 (d,  $J$  = 11.6 Hz, 1H), 4.24 (d,  $J$  = 11.2 Hz, 1H), 4.08 (d,  $J$  = 2.0 Hz, 1H), 3.83-3.80 (m, 2H), 3.63 (dd,  $J$  = 7.6 Hz,  $J$  = 9.2 Hz, 1H), 3.55-3.48 (m, 2H), 3.30-3.24 (m, 1H), 2.44-2.37 (m, 1H), 2.06-1.99 (m, 1H); <sup>13</sup>C NMR (CDCl<sub>3</sub>, 100 MHz)  $\delta$  150.9, 138.9, 138.3, 138.0, 137.9, 137.8, 128.4, 128.3, 128.3, 128.3, 128.3, 128.3, 128.0, 128.0, 127.9, 127.9, 127.9, 127.9, 127.8, 127.8, 127.7, 127.5, 127.3, 127.3, 127.3, 127.3, 125.2, 125.1, 122.5, 113.3, 80.9, 80.72, 75.4, 74.3, 74.3, 74.2, 73.5, 72.3, 71.2, 69.1, 38.1, 24.7. HRMS (EI)  $m/z$  calcd for C<sub>42</sub>H<sub>42</sub>N<sub>2</sub>O<sub>7</sub> (M<sup>+</sup>) 686.2992, found 686.2997.

**(1*S*,2*R*,3*S*,4*S*,5*R*)-2,3,4-tris(benzyloxy)-5-((benzyloxy)methyl)-7'-methyl-2',2,3',3,4,5-hexahydro-1'H-spiro[pyran-1,4'-quinoline] (4v)<sup>S1</sup>**

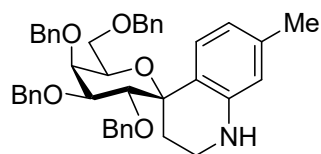

Compound **1b** (0.09 mmol, 51 mg) was treated according to the aforementioned method to give the yellow oil **4v** (38.3 mg, 65%):  $[\alpha]^{25}_{\text{D}} +20.6$  (*c* 0.43,  $\text{CHCl}_3$ );  $^1\text{H}$  NMR ( $\text{CDCl}_3$ , 400 MHz)  $\delta$  7.41-7.16 (19H, m, ArH), 7.01-6.99 (m, 2H), 6.51 (d,  $J = 7.6$  Hz, 1H), 6.35 (m, 1H), 5.05 (d,  $J = 12.0$  Hz, 1H), 4.74 (brs, 2H), 4.64 (d,  $J = 11.6$  Hz, 1H), 4.51-4.48 (brs, 2H), 4.42 (d,  $J = 11.6$  Hz, 1H), 4.37 (d,  $J = 11.6$  Hz, 1H), 4.13 (d,  $J = 10.8$  Hz, 1H), 4.06 (d,  $J = 2.4$  Hz, 1H), 3.85-3.82 (m, 1H), 3.74 (dd,  $J = 2.4$  Hz,  $J = 10.0$  Hz, 1H), 3.69 (dd,  $J = 8.4$  Hz,  $J = 8.8$  Hz, 1H), 3.49 (dd,  $J = 4.8$  Hz,  $J = 8.8$  Hz, 1H), 3.32-3.27 (m, 1H), 3.19-3.13 (m, 1H), 2.41-2.34 (m, 1H), 2.20 (s, 3H), 2.09-2.03 (m, 1H);  $^{13}\text{C}$  NMR ( $\text{CDCl}_3$ , 100 MHz)  $\delta$  146.1, 139.4, 138.8, 138.8, 138.3, 137.9, 128.3, 128.3, 128.2, 128.2, 128.1, 128.1, 128.1, 127.9, 127.9, 127.9, 127.9, 127.9, 127.9, 127.9, 127.9, 127.6, 127.4, 127.4, 127.3, 127.3, 127.1, 127.1, 121.4, 119.1, 115.3, 81.4, 80.9, 75.16, 75.13, 74.9, 74.4, 73.5, 72.5, 70.3, 69.1, 38.6, 25.4, 21.1; HRMS (EI): *m/z* calcd for  $\text{C}_{43}\text{H}_{45}\text{NO}_5$  ( $\text{M}^+$ ) 655.3298, found 655.3296.

**(1*S*,2*R*,3*S*,4*S*,5*R*)-2,3,4-tris(benzyloxy)-5-((benzyloxy)methyl)-7'-chloro-2',2,3',3,4,5-hexahydro-1'H-spiro[pyran-1,4'-quinoline] (4w)<sup>S1</sup>**

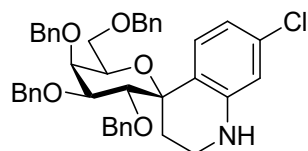

Compound **1b** (0.09 mmol, 51 mg) was treated according to the aforementioned method to give the yellow oil **4w** (50.4 mg, 83%):  $[\alpha]^{25}_{\text{D}} +6.5$  (*c* 0.81,  $\text{CHCl}_3$ );  $^1\text{H}$  NMR ( $\text{CDCl}_3$ , 400 MHz)  $\delta$  7.40-7.17 (m, 19H), 7.00-6.98 (m, 2H), 6.60 (d,  $J = 8.4$  Hz, 1H),

6.49 (brs, 1H), 5.03 (d,  $J = 11.6$  Hz, 1H), 4.74 (brs, 2H), 4.63 (d,  $J = 11.6$  Hz, 1H), 4.54 (d,  $J = 10.8$  Hz, 1H), 4.45-4.37 (m, 3H), 4.15 (d,  $J = 10.8$  Hz, 1H), 4.06 (brs, 1H), 3.96 (brs, 1H), 3.84-3.81 (m, 1H), 3.75 (dd,  $J = 2.0$  Hz,  $J = 10.0$  Hz, 1H), 3.67 (dd,  $J = 8.4$  Hz,  $J = 8.8$  Hz, 1H), 3.49 (dd,  $J = 5.2$  Hz,  $J = 8.8$  Hz, 1H), 3.38-3.32 (m, 1H), 3.18-3.12 (m, 1H), 2.41-2.34 (m, 1H), 2.05-2.00 (m, 1H);  $^{13}\text{C}$  NMR ( $\text{CDCl}_3$ , 100 MHz)  $\delta$  147.1, 139.2, 138.6, 138.4, 137.8, 134.0, 129.5, 128.3, 128.3, 128.3, 128.3, 128.2, 128.2, 128.0, 128.0, 127.9, 127.9, 127.8, 127.8, 127.7, 127.5, 127.4, 127.4, 127.3, 127.3, 127.3, 127.2, 122.4, 117.7, 114.0, 81.4, 80.8, 75.2, 74.9, 74.7, 74.5, 73.5, 72.5, 70.5, 69.0, 38.4, 25.3; HRMS (EI):  $m/z$  calcd for  $\text{C}_{42}\text{H}_{42}\text{ClNO}_5$  ( $\text{M}^+$ ) 675.2752, found 675.2758.

**(1*S*,2*R*,3*S*,4*R*,5*R*)-2,3,4-tris(benzyloxy)-5-((benzyloxy)methyl)-2',2,3',3,4,5-hexahydro-1*H*-spiro[naphtho[2',3'-*h*]quinoline-4',1-pyran]-7',12'-dione (**4x**)**

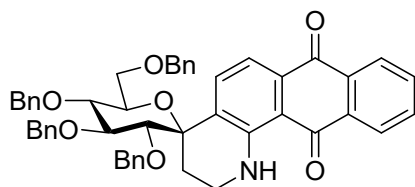

Compound **1a** (0.09 mmol, 51 mg) was treated according to the aforementioned method to give the red oil **4x** (42.3 mg, 61%):  $[\alpha]_D^{25}$  unable to record ( $c$  0.19,  $\text{CHCl}_3$ );  $^1\text{H}$  NMR ( $\text{CDCl}_3$ , 400 MHz)  $\delta$  10.12 (s, 1H), 8.31-8.29 (m, 1H), 8.25-2.23 (m, 1H), 7.80-7.75 (m, 2H), 7.72-7.68 (m, 1H), 7.54 (d,  $J = 7.6$  Hz, 1H), 7.34-7.20 (m, 15H), 7.08-7.06 (m, 3H), 6.93-6.90 (m, 2H), 4.92 (d,  $J = 10.8$  Hz, 1H), 4.89 (d,  $J = 9.2$  Hz, 2H), 4.63 (d,  $J = 10.8$  Hz, 1H), 4.62 (d,  $J = 12.0$  Hz, 1H), 4.55 (d,  $J = 10.8$  Hz, 1H), 4.53 (d,  $J = 12.0$  Hz, 1H), 4.13 (d,  $J = 10.8$  Hz, 1H), 4.00-3.97 (m, 1H), 3.91-3.76 (m, 5H), 3.70 (m, 1H), 3.53-3.46 (m, 1H), 2.61-2.55 (m, 1H), 2.10-2.03 (m, 1H);  $^{13}\text{C}$  NMR ( $\text{CDCl}_3$ , 100

MHz)  $\delta$  184.5, 183.6, 149.6, 138.4, 138.2, 138.0, 137.5, 135.1, 134.0, 133.9, 133.0, 132.8, 132.6, 131.6, 128.4, 128.4, 128.4, 128.4, 128.4, 128.4, 128.3, 128.3, 128.1, 128.1, 128.0, 127.9, 127.8, 127.8, 127.8, 127.6, 127.6, 127.6, 127.6, 127.6, 127.5, 126.6, 115.3, 112.1, 86.7, 83.2, 78.9, 75.7, 75.6, 75.2, 73.7, 73.4, 72.8, 69.3, 37.3, 25.1; HRMS (EI):  $m/z$  calcd for  $C_{50}H_{45}NO_7$  771.3196, found 771.3198.

**(1*S*,2*R*,3*S*,4*S*,5*R*)-2,3,4-tris(benzyloxy)-5-((benzyloxy)methyl)-2',3',2,3,4,5-hexahydro-1*H*-spiro[naphtho[2',3'-*h*]quinoline-4',1-pyran]-7',12'-dione (4y)**

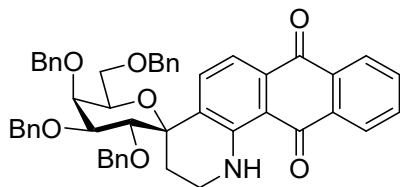

Compound **1a** (0.09 mmol, 51 mg) was treated according to the aforementioned method to give the red oil **4y** (48.6 mg, 70%):  $[\alpha]^{25}_D$  unable to record ( $c$  0.26,  $CHCl_3$ );  $^1H$  NMR ( $CDCl_3$ , 400 MHz)  $\delta$  10.06 (s, 1H), 8.29 (d,  $J = 7.6$  Hz, 1H), 8.23 (d,  $J = 6.8$  Hz, 1H), 7.80 (d,  $J = 7.6$  Hz, 1H), 7.76 (dd,  $J = 1.2$  Hz,  $J = 6.8$  Hz, 1H), 7.69 (dd,  $J = 1.2$  Hz,  $J = 7.6$  Hz, 1H), 7.50 (d,  $J = 7.6$  Hz, 1H), 7.39-7.25 (m, 15H), 7.07-7.06 (m, 3H), 6.95-6.92 (m, 2H), 5.05 (d,  $J = 11.6$  Hz, 1H), 4.79 (d,  $J = 11.6$  Hz, 1H), 4.75 (d,  $J = 11.6$  Hz, 1H), 4.66 (d,  $J = 10.4$  Hz, 1H), 4.63 (d,  $J = 10.4$  Hz, 1H), 4.46 (d,  $J = 11.6$  Hz, 1H), 4.41 (d,  $J = 11.6$  Hz, 2H), 4.20 (d,  $J = 10.8$  Hz, 1H), 4.10 (d,  $J = 2.0$  Hz, 1H), 3.90-3.85 (m, 2H), 3.79-3.73 (m, 1H), 3.68 (dd,  $J = 7.6$  Hz,  $J = 9.2$  Hz, 1H), 3.53 (dd,  $J = 5.6$  Hz,  $J = 9.2$  Hz, 1H), 3.45-3.42 (m, 1H), 2.53-2.47 (m, 1H), 2.07-2.00 (m, 1H);  $^{13}C$  NMR ( $CDCl_3$ , 100 MHz)  $\delta$  184.5, 183.6, 149.7, 139.0, 138.4, 137.9, 137.8, 135.2, 133.9, 133.8, 133.3, 133.0, 132.7, 132.0, 128.5, 128.4, 128.4, 128.4, 128.3, 128.2, 128.2, 128.0, 128.0, 127.9, 127.9, 127.9, 127.9, 127.7, 127.6, 127.5, 127.5, 127.4, 127.3,

127.3, 126.9, 126.6, 115.5, 112.1, 82.0, 80.7, 75.7, 74.8, 74.6, 74.5, 73.5, 72.5, 71.2, 69.0, 37.4, 24.5; HRMS (EI):  $m/z$  calcd for  $C_{50}H_{45}NO_7$  771.3196, found 771.3192.

### Typical Procedure for Synthesis of deprotection compounds 5a-5e.

Anomeric spiro-glycosides **4** were dissolved in 5 mL of EtOH/HCl (20/1, v/v), 10% Pd/C (0.03 mmol) was then added to the solution. The mixture was stirred in a hydrogen atmosphere continuously for 2 h. After the reaction was complete, Et<sub>3</sub>N was added to neutralize the reaction mixture, and the resulting mixture was filtered and concentrated under vacuum to give a crude mixture, which was then purified by flash column chromatography (DCM/MeOH, 6:1, v/v) to obtain the deprotection compounds **5a-5e** in 78–90% yields.

### Spectroscopic Characterization Data of 5a-5e

#### (1*S*,2*R*,3*S*,4*R*,5*R*)-5-(hydroxymethyl)-2',2',3',3',4,5-hexahydro-1'H-spiro[pyran-1,4'-quinoline]-2,3,4-triol (**5a**)

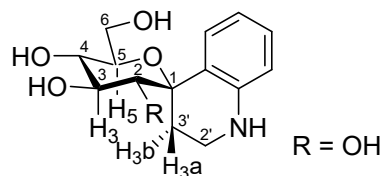

Compound **4a** (0.1 mmol, 64 mg) was treated according to the aforementioned method to give the blue oil **5a** (24.7 mg, 88%): [ $\alpha$ ]<sub>D</sub><sup>25</sup> unable to record (*c* 0.15, MeOH); <sup>1</sup>H NMR (D<sub>2</sub>O, 400 MHz)  $\delta$  7.37 (1H, d,  $J$  = 8.0 Hz, H5'), 7.09 (1H, dd,  $J$  = 7.6 Hz,  $J$  = 8.0 Hz, H7'), 6.76 (1H, dd,  $J$  = 7.6 Hz,  $J$  = 8.0 Hz, H6'), 6.66 (1H, d,  $J$  = 8.0 Hz, H8'), 3.97 (1H, d,  $J$  = 10.0 Hz, H2), 3.70-3.56 (2H, m, H3, H6a), 3.62-3.56 (2H, m, H4, H6b), 3.42 (1H, dd,  $J$  = 9.2 Hz,  $J$  = 9.2 Hz, H5), 3.17-3.12 (1H, m, H2a'), 3.07-3.01 (1H, m, H2b'), 2.19-2.16 (1H, m, H3a'), 2.03-1.96 (1H, m, H3b'); <sup>13</sup>C NMR (D<sub>2</sub>O, 100 MHz)  $\delta$  146.1, 129.6, 127.0, 122.6, 119.2, 116.8, 75.0 (C-1), 73.8 (C-2), 73.5 (C-3), 72.8 (C-4), 70.5 (C-5), 61.3 (C-6), 36.5 (C-2'), 23.0 (C-3');

C<sub>14</sub>H<sub>18</sub>NO<sub>5</sub>Na (M<sup>+</sup>) 303.1077, found 303.1078.

**(1*S*,2*R*,3*S*,4*R*,5*R*)-5-(hydroxymethyl)-6'-isopropyl-2',2,3',3,4,5-hexahydro-1'H-spiro[pyran-1,4'-quinoline]-2,3,4-triol (5b)**

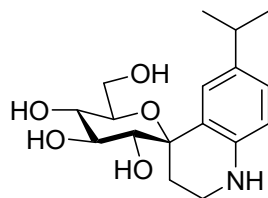

Compound **4d** (0.1 mmol, 68 mg) was treated according to the aforementioned method to give the pale yellow oil **5b** (29.0 mg, 90%):  $[\alpha]_D^{25} +2.2$  (*c* 0.22, MeOH); <sup>1</sup>H NMR (D<sub>2</sub>O, 400 MHz)  $\delta$  7.25 (s, 1H), 7.04 (d, *J* = 8.4 Hz, 1H), 6.64 (dd, *J* = 8.4 Hz, 1H), 4.00 (d, *J* = 9.6 Hz, 1H), 3.72-3.59 (m, 4H), 3.42 (dd, *J* = 9.2 Hz, *J* = 9.2 Hz, 1H), 3.14-3.11 (m, 1H), 3.02 (dd, *J* = 11.2 Hz, *J* = 11.6 Hz, 1H), 2.77-2.70 (m, 1H), 2.17 (d, *J* = 14.0 Hz, 1H), 2.00 (dd, *J* = 11.2 Hz, *J* = 14.0 Hz, 1H), 1.08 (d, *J* = 6.8 Hz, 6H); <sup>13</sup>C NMR (D<sub>2</sub>O, 100 MHz)  $\delta$  144.1, 140.4, 127.5, 124.7, 122.8, 117.1, 75.2, 74.0, 73.6, 72.8, 70.7, 61.5, 36.8, 33.0, 23.4, 23.3, 23.3; HRMS (ESI): *m/z* calcd for C<sub>17</sub>H<sub>25</sub>NO<sub>5</sub>Na (M<sup>+</sup>) 345.1547, found 345.1552.

**(1*S*,2*R*,3*S*,4*R*,5*R*)-6'-benzyl-5-(hydroxymethyl)-2',2,3',3,4,5-hexahydro-1'H-spiro[pyran-1,4'-quinoline]-2,3,4-triol (5c)**

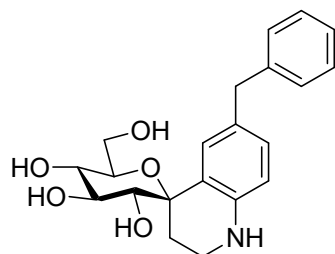

Compound **4d** (0.1 mmol, 68 mg) was treated according to the aforementioned method to give the pale yellow oil **5c** (27.3 mg, 82%):  $[\alpha]_D^{25} +2.2$  (*c* 0.07, MeOH); <sup>1</sup>H NMR

(D<sub>2</sub>O, 400 MHz) 7.25-7.12 (m, 6H), 6.97 (d, *J* = 8.4 Hz, 1H), 6.60 (d, *J* = 8.4 Hz, 1H), 3.91 (d, *J* = 9.6 Hz, 1H), 3.80 (s, 2H), 3.70-3.64 (m, 2H), 3.59-3.56 (m, 2H), 3.39 (dd, *J* = 9.2 Hz, *J* = 9.2 Hz, 1H), 3.13-3.09 (m, 1H), 3.01 (dd, *J* = 11.2 Hz, *J* = 11.6 Hz, 1H), 2.17-2.12 (m, 1H), 2.02-1.95 (m, 1H); <sup>13</sup>C NMR (D<sub>2</sub>O, 100 MHz) δ 144.5 (unable to record), 142.3, 132.3, 130.0, 128.7, 128.7, 128.7, 128.7, 127.0, 126.1, 122.8, 117.2, 75.1, 74.0, 73.6, 72.8, 70.6, 61.3, 40.4, 36.7, 23.2; HRMS (EI): *m/z* calcd for C<sub>21</sub>H<sub>24</sub>NO<sub>5</sub>Na (M<sup>+</sup>) 393.1547, found 393.1554.

**(1*S*,2*R*,3*S*,4*R*,5*R*)-6'-fluoro-5-(hydroxymethyl)-2',2,3',3,4,5-hexahydro-1'H-spiro[pyran-1,4'-quinoline]-2,3,4-triol (5d)**

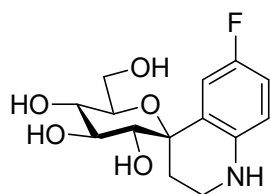

Compound **4g** (0.08 mmol, 52.7 mg) was treated according to the aforementioned method to give the pale yellow oil **5d** (18.7 mg, 78%): [ $\alpha$ ]<sub>D</sub><sup>25</sup> +8.6 (*c* 0.15, MeOH); <sup>1</sup>H NMR (D<sub>2</sub>O, 400 MHz) δ 7.15 (d, *J* = 10.6 Hz, 1H), 6.87 (dd, *J* = 8.4 Hz, *J* = 8.4 Hz, 1H), 6.65 (dd, *J* = 6.8 Hz, *J* = 7.2 Hz, 1H), 3.86 (d, *J* = 9.6 Hz, 1H), 3.71-3.59 (m, 4H), 3.43 (dd, *J* = 8.4 Hz, *J* = 9.2 Hz, 1H), 3.15-3.12 (m, 1H), 3.01 (dd, *J* = 11.2 Hz, *J* = 11.6 Hz, 1H), 2.16 (d, *J* = 13.6 Hz, 1H), 2.01 (dd, *J* = 12.0 Hz, *J* = 13.6 Hz, 1H); <sup>13</sup>C NMR (D<sub>2</sub>O, 100 MHz) δ 156.4 (d, *J* = 232.7 Hz), 142.6, 123.9, 118.2 (d, *J* = 7.9 Hz), 116.6 (d, *J* = 23.1 Hz), 113.0 (d, *J* = 22.8 Hz), 75.0, 74.3, 73.4, 72.9, 70.4, 61.2, 36.9, 23.1; HRMS (ESI): *m/z* calcd for C<sub>14</sub>H<sub>18</sub>FNO<sub>5</sub>Na (M<sup>+</sup>) 321.0983, found 321.0986.

**(1*S*,2*R*,3*S*,4*S*,5*R*)-6'-fluoro-5-(hydroxymethyl)-2',2,3',3,4,5-hexahydro-1'H-spiro[pyran-1,4'-quinoline]-2,3,4-triol (5e)**

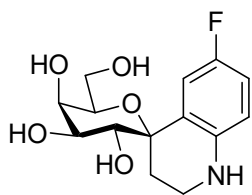

Compound **4r** (0.08 mmol, 52.7 mg) was treated according to the aforementioned method to give the pale yellow oil **5e** (22.5 mg, 94%):  $[\alpha]_D^{25} +8.6$  (*c* 0.13, MeOH);  $^1\text{H}$  NMR ( $\text{D}_2\text{O}$ , 400 MHz)  $\delta$  7.20 (dd,  $J = 2.8$  Hz,  $J = 10.8$  Hz, 1H), 6.90-6.85 (m, 1H), 6.65 (dd,  $J = 5.2$  Hz,  $J = 9.2$  Hz, 1H), 4.20 (d,  $J = 10.4$  Hz, 1H), 3.95 (d,  $J = 2.8$  Hz, 1H), 3.88-3.82 (m, 2H), 3.64-3.54 (m, 2H), 3.16-3.11 (m, 1H), 3.05-2.98 (m, 1H), 2.21-2.16 (m, 1H), 2.03-1.95 (m, 1H);  $^{13}\text{C}$  NMR ( $\text{D}_2\text{O}$ , 100 MHz)  $\delta$  156.4 (d,  $J = 232.4$  Hz), 142.5, 124.1, 118.1 (d,  $J = 7.5$  Hz), 116.5 (d,  $J = 22.7$  Hz), 113.2 (d,  $J = 23.1$  Hz), 75.5, 71.8, 71.0, 70.1, 69.4, 61.2, 37.0, 22.4; HRMS (ESI):  $m/z$  calcd for  $\text{C}_{14}\text{H}_{18}\text{FNO}_5\text{Na}$  ( $\text{M}^+$ ) 321.0983, found 321.0988.

### Typical Procedure for Synthesis of side products **3a-I**, **3a-II**

To a solution of *exo*-glucal **1a** (0.09 mmol), arylamines **2a** (0.11 mmol) and acetic acid (0.45 mmol) in dichloroethane (DCE) (2.0 mL) was added  $\text{ZnCl}_2$  (0.14 mmol). The reaction mixture was stirred at 65 °C under  $\text{N}_2$  for 8 h. After the reaction was complete,  $\text{CH}_2\text{Cl}_2$  (50 mL) was added to the reaction mixture, washed twice with  $\text{H}_2\text{O}$  (20 mL for each), twice with brine (20 mL for each), and dried over  $\text{MgSO}_4$ . The collected organic layer was concentrated under reduced pressure. Finally, the reaction mixture was purified by silica gel column chromatography with *n*-hexane/ethyl acetate (3/1) to give products **3a-I**, **3a-II** in 8% and 24% yields.

### Spectroscopic Characterization Data of **3a-I**, **3a-II**

*N*-((*Z*)-2-((2*R*,3*S*,4*R*,5*R*)-2,3,4-tris(benzyloxy)-5-((benzyloxy)methyl)tetrahydro-

### 2H-pyran-2-ylidene)ethyl)aniline (**3a-I**)<sup>S1</sup>

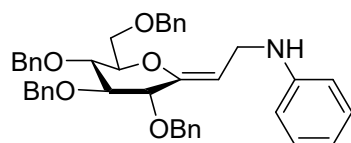

Compound **1a** (0.09 mmol, 51 mg) was treated according to the aforementioned method to give the yellow oil **3a-I** (4.6 mg, 8%):  $[\alpha]_D^{25} +44.0$  (*c* 0.10, CHCl<sub>3</sub>); <sup>1</sup>H NMR (CDCl<sub>3</sub>, 400 MHz)  $\delta$  7.34-7.25 (*m*, 18 H), 7.18-7.14 (*m*, 4H), 6.70 (*m*, 1H), 6.63 (*m*, 2H), 5.10 (*m*, 1H), 4.78 (*d*, *J* = 8.4 Hz, 1H), 4.76 (*d*, *J* = 8.4 Hz, 1H), 4.68 (*d*, *J* = 6.4 Hz, 1H), 4.66 (*d*, *J* = 6.4 Hz, 1H), 4.63 (*d*, *J* = 11.6 Hz, 1H), 4.57 (*d*, *J* = 11.6 Hz, 1H), 4.55 (*d*, *J* = 9.6 Hz, 1H), 4.52 (*d*, *J* = 9.6 Hz, 1H), 3.94-3.69 (*m*, 9H); <sup>13</sup>C NMR (CDCl<sub>3</sub>, 125 MHz)  $\delta$  150.1, 148.2, 138.1, 138.1, 138.0, 137.7, 129.1, 129.1, 128.4, 128.4, 128.4, 128.4, 128.3, 128.3, 128.3, 128.3, 127.9, 127.9, 127.8, 127.8, 127.8, 127.8, 127.7, 127.7, 127.7, 127.6, 117.4, 113.2, 113.1, 107.6, 84.6, 78.6, 77.7, 77.5, 74.2, 77.2, 73.9, 73.5, 72.3, 68.7, 38.7; HRMS (EI): *m/z* (*M*<sup>+</sup>) calcd for C<sub>42</sub>H<sub>43</sub>NO<sub>5</sub> 641.3141; found 641.3148.

### (1S,2R,3S,4R,5R)-2,3,4-tris(benzyloxy)-5-((benzyloxy)methyl)-N-phenyl-2-(2-(phenylamino)ethyl)tetrahydro-2H-pyran-1-amine (**3a-II**)<sup>S1</sup>

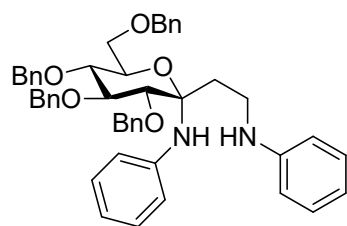

Compound **1a** (0.09 mmol, 51 mg) was treated according to the aforementioned method to give the brown oil **3a-II** (15.9 mg, 24%):  $[\alpha]_D^{25} +44.0$  (*c* 0.15, CHCl<sub>3</sub>); <sup>1</sup>H NMR (CDCl<sub>3</sub>, 500 MHz)  $\delta$  7.39-7.24 (*m*, 18 H), 7.18-7.16 (*m*, 2H), 7.11 (*d*, *J* = 8.0 Hz, 1H), 7.09 (*d*, *J* = 7.5 Hz, 1H), 7.04 (*d*, *J* = 7.5 Hz, 1H), 7.03 (*d*, *J* = 7.5 Hz, 1H), 6.92-6.90 (*m*, 2H), 6.76 (*dd*, *J* = 7.5 Hz, *J* = 7.5 Hz, 1H), 6.62 (*dd*, *J* = 7.5 Hz, *J* = 7.5 Hz, 1H),

6.44-6.42 (m, 2H), 4.96 (d,  $J = 11.0$  Hz, 1H), 4.94 (d,  $J = 11.0$  Hz, 1H), 4.86 (d,  $J = 11.0$  Hz, 1H), 4.81 (d,  $J = 11.0$  Hz, 1H), 4.71 (d,  $J = 11.0$  Hz, 1H), 4.69 (d,  $J = 11.0$  Hz, 1H), 4.59 (d,  $J = 11.0$  Hz, 1H), 4.55 (d,  $J = 11.0$  Hz, 1H), 4.42 (brs, 1H), 4.08 (dd,  $J = 9.0$  Hz,  $J = 9.0$  Hz, 1H), 4.02-3.99 (m, 1H), 3.82 (dd,  $J = 3.5$  Hz,  $J = 11.0$  Hz, 1H), 3.78-3.72 (m, 2H), 3.69 (d,  $J = 9.0$  Hz, 1H), 3.06-3.04 (m, 2H), 2.54-2.48 (m, 1H), 1.87-1.82 (m, 1H);  $^{13}\text{C}$  NMR ( $\text{CDCl}_3$ , 125 MHz)  $\delta$  148.4, 144.3, 138.4, 138.2, 138.0, 137.7, 129.0, 129.0, 129.0, 129.0, 128.5, 128.5, 128.4, 128.4, 128.4, 128.4, 128.4, 128.3, 128.3, 128.0, 128.0, 128.0, 127.7, 127.7, 127.6, 127.6, 127.6, 127.6, 127.5, 127.5, 127.5, 119.1, 116.9, 116.6, 116.6, 112.9, 112.9, 89.6, 84.3, 79.4, 78.5, 75.6, 75.2, 74.7, 73.4, 70.6, 68.9, 39.5, 32.1; HRMS (EI):  $m/z$  ( $\text{M}^+$ ) calcd for  $\text{C}_{48}\text{H}_{50}\text{N}_2\text{O}_5$  734.3720; found 734.3730.

**Reference:**

- S1. P.-Y. Chen, Y.-T. Chiang, M.-T. Hsieh, Y.-C. Hseu, C.-H. Lin,\* H.-C. Lin.\*  
Expedition and Stereoselective Synthesis of (1*S*)-Spiro- [pyran-4-quinolines].  
*Eur. J. Org. Chem.* **2022**, e202201116.

# NMR Spectra

## $^1\text{H}$ and $^{13}\text{C}$ NMR spectra of 3a-3r

### $^1\text{H}$ NMR spectrum of 3a

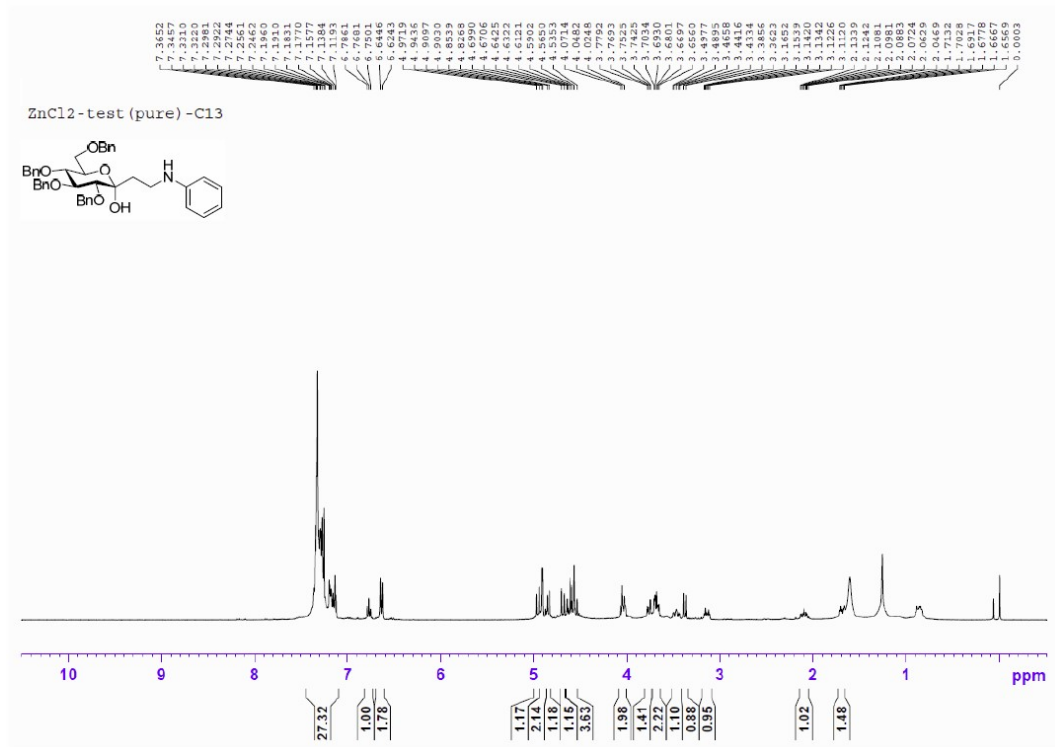

### $^{13}\text{C}$ NMR spectra of 3a

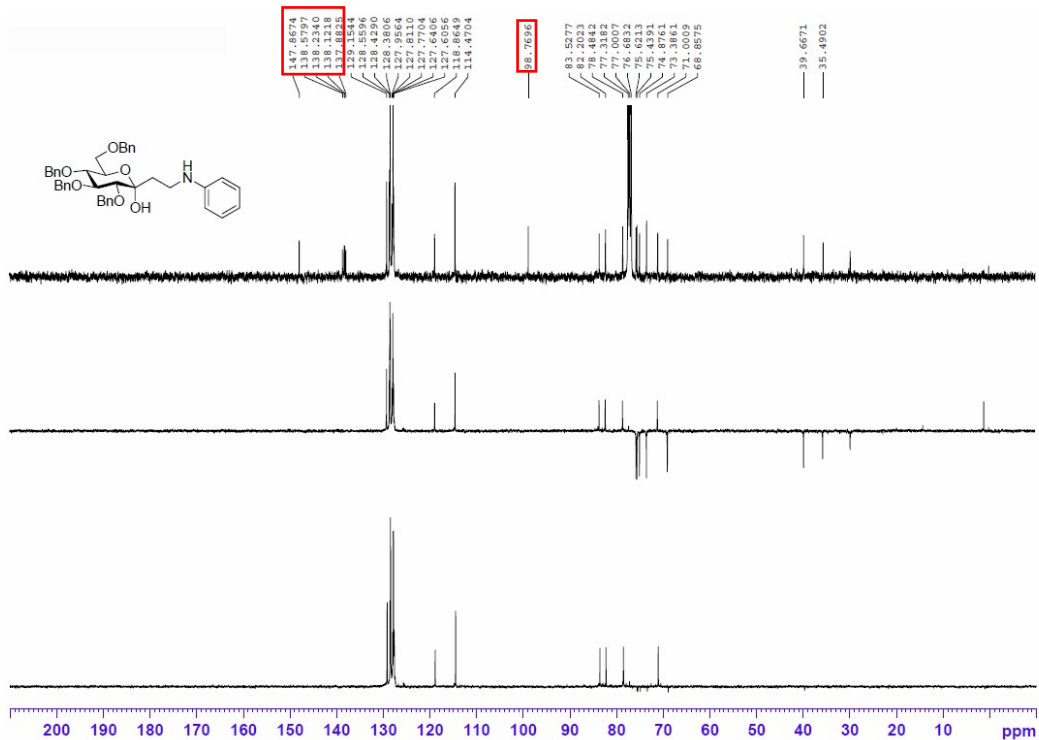

## 2D NMR Spectra of 3a

H-H COSY NMR spectrum of 3a

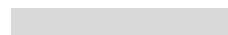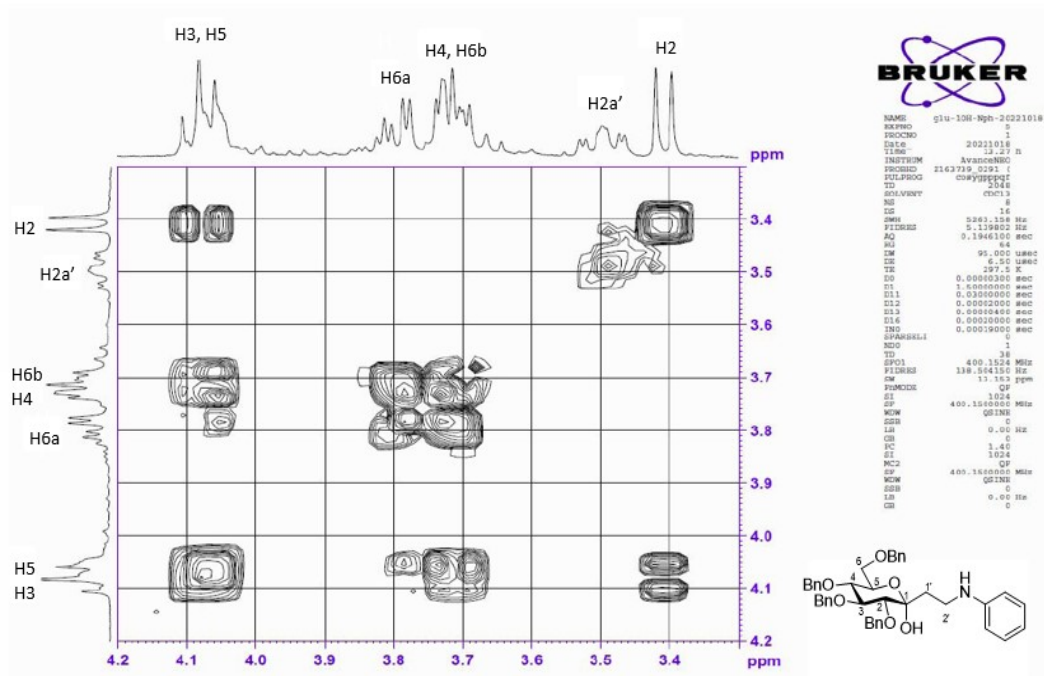

NOESY NMR spectrum of 3a

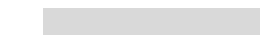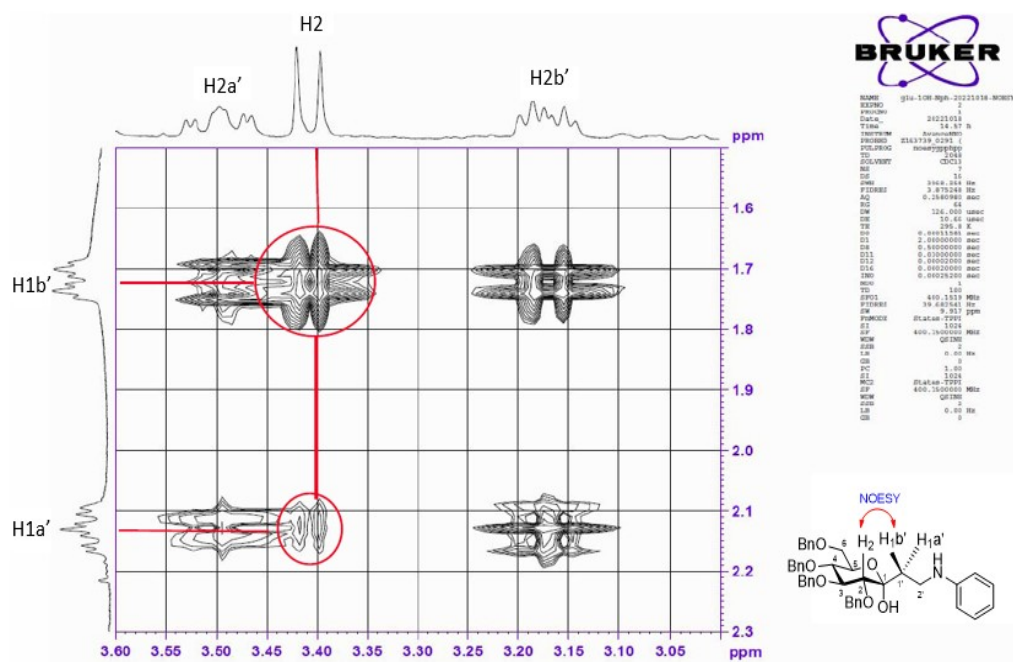



<sup>1</sup>H NMR spectrum of **3c**

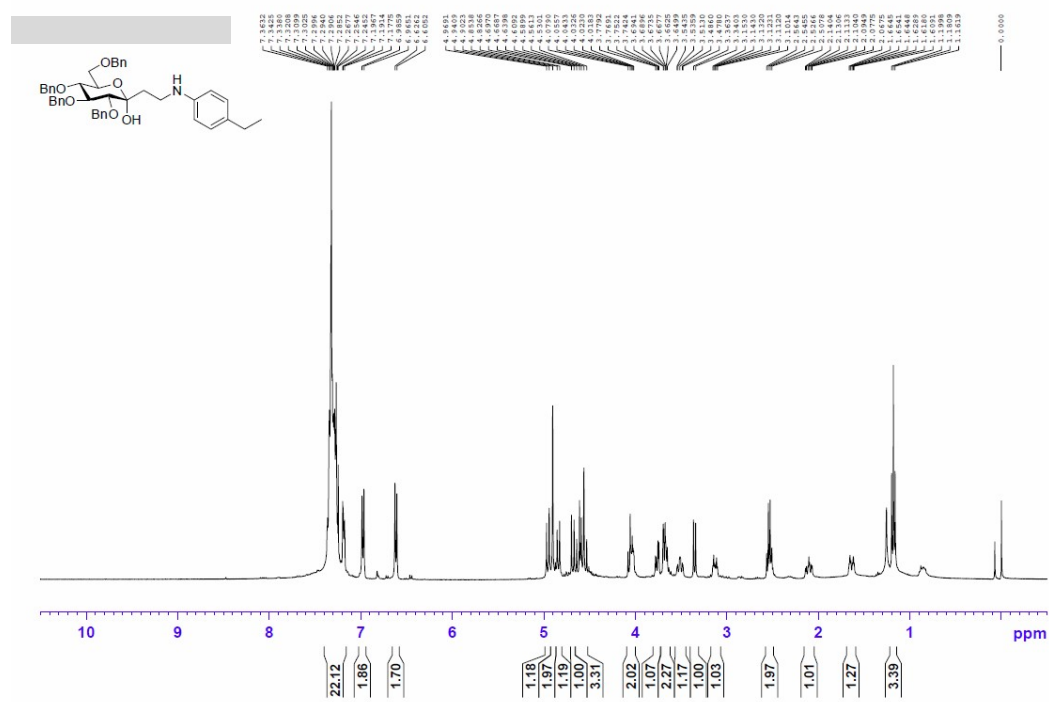

<sup>1</sup>H NMR spectrum of **3d**

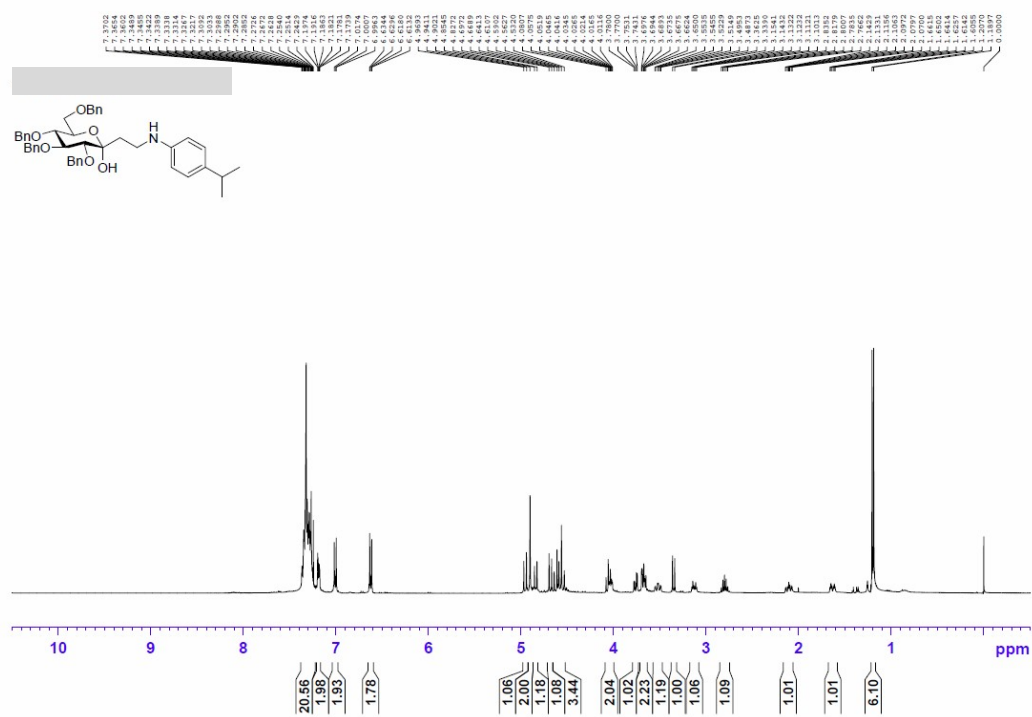



<sup>1</sup>H NMR spectrum of **3f**

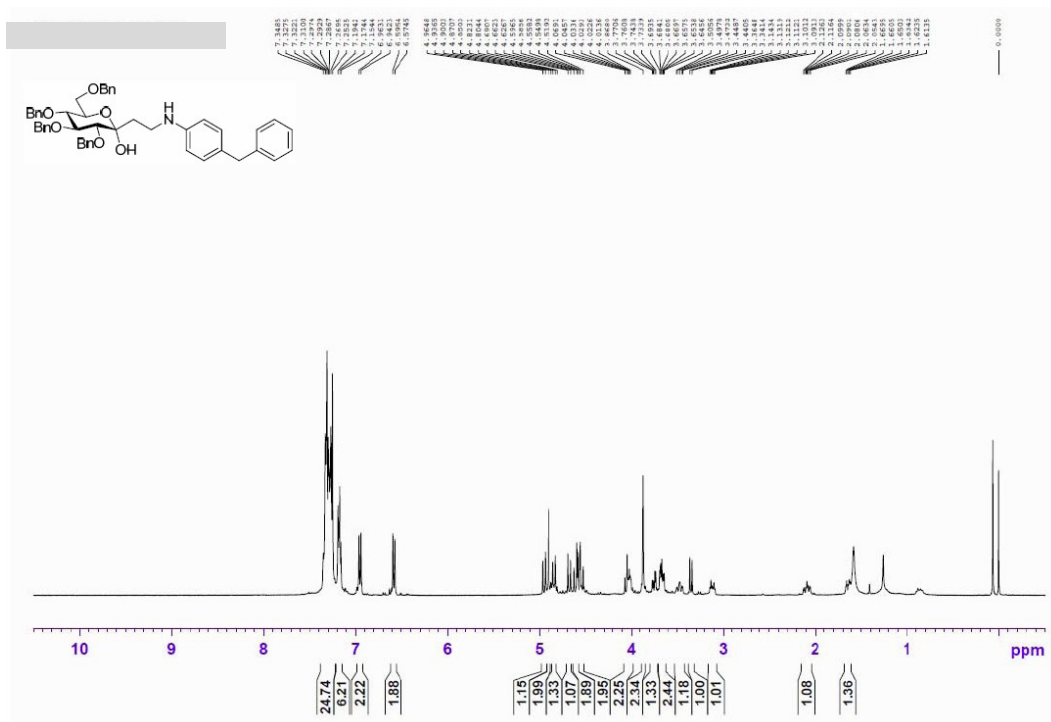

<sup>13</sup>C NMR spectra of **3f**

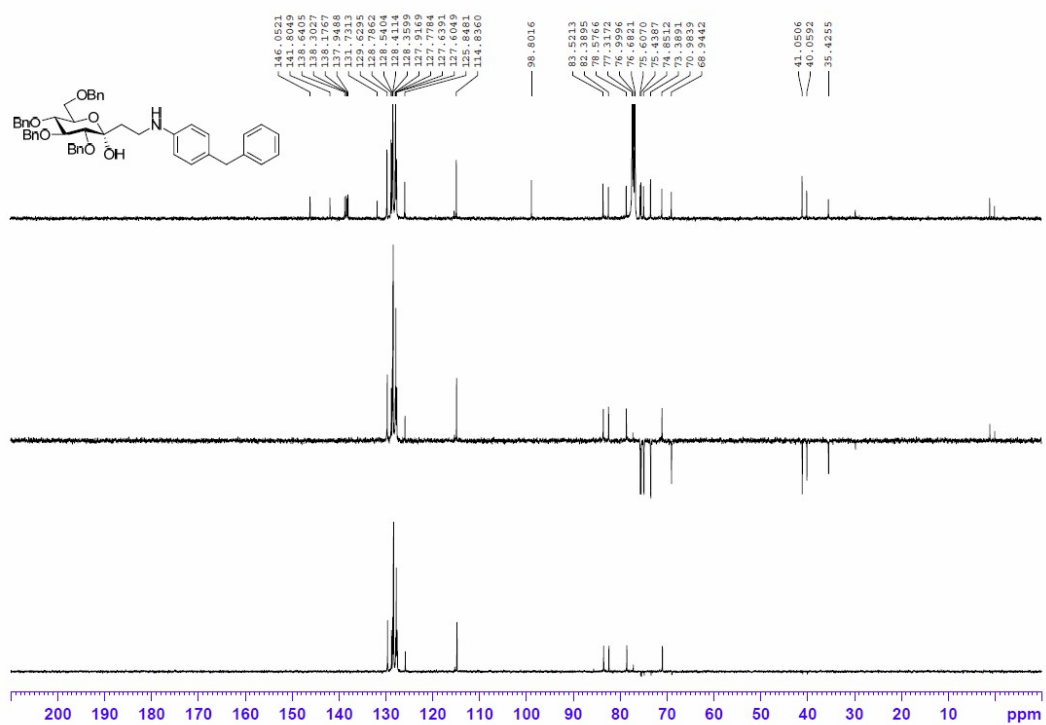

### <sup>1</sup>H NMR spectrum of **3g**

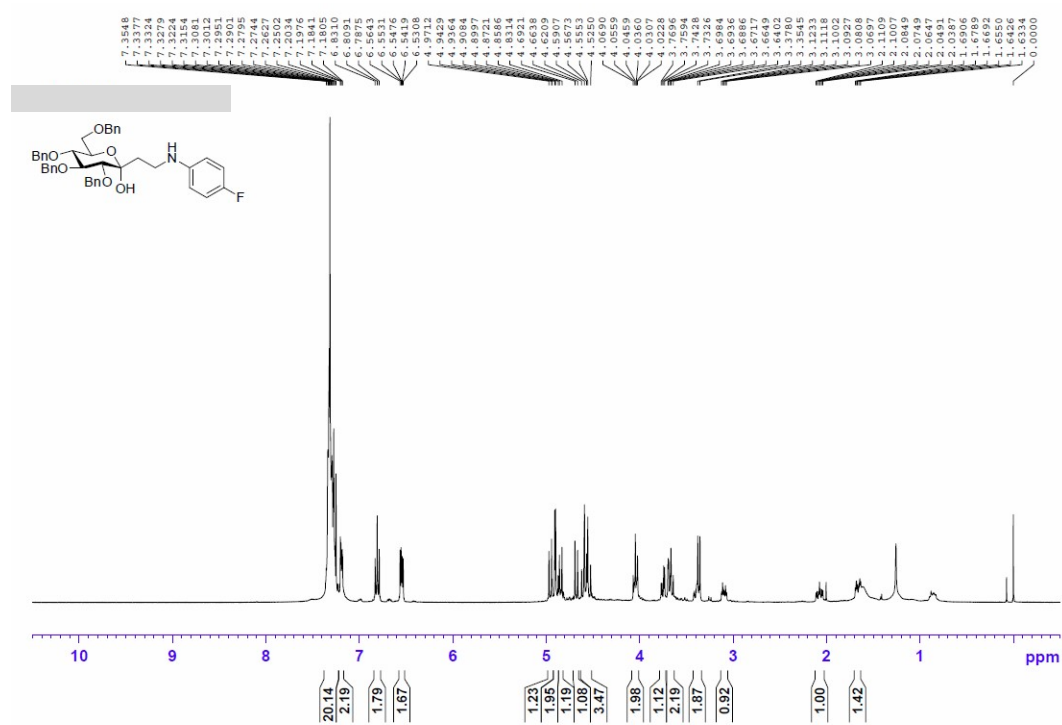

### <sup>13</sup>C NMR spectra of **3g**

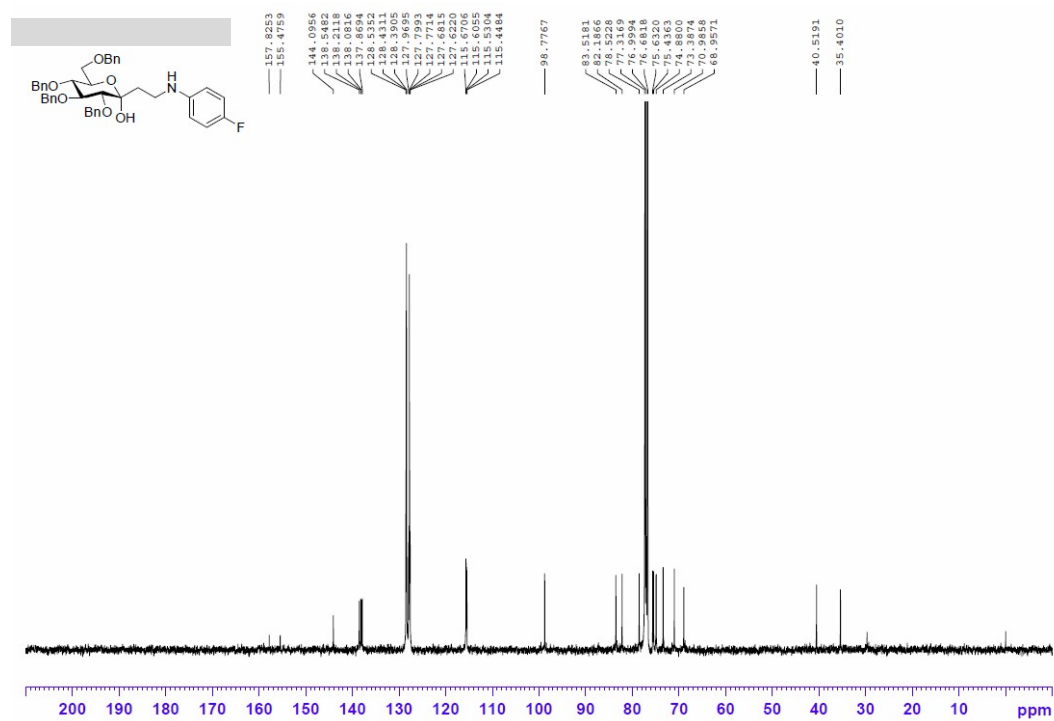





<sup>1</sup>H NMR spectrum of **3j**

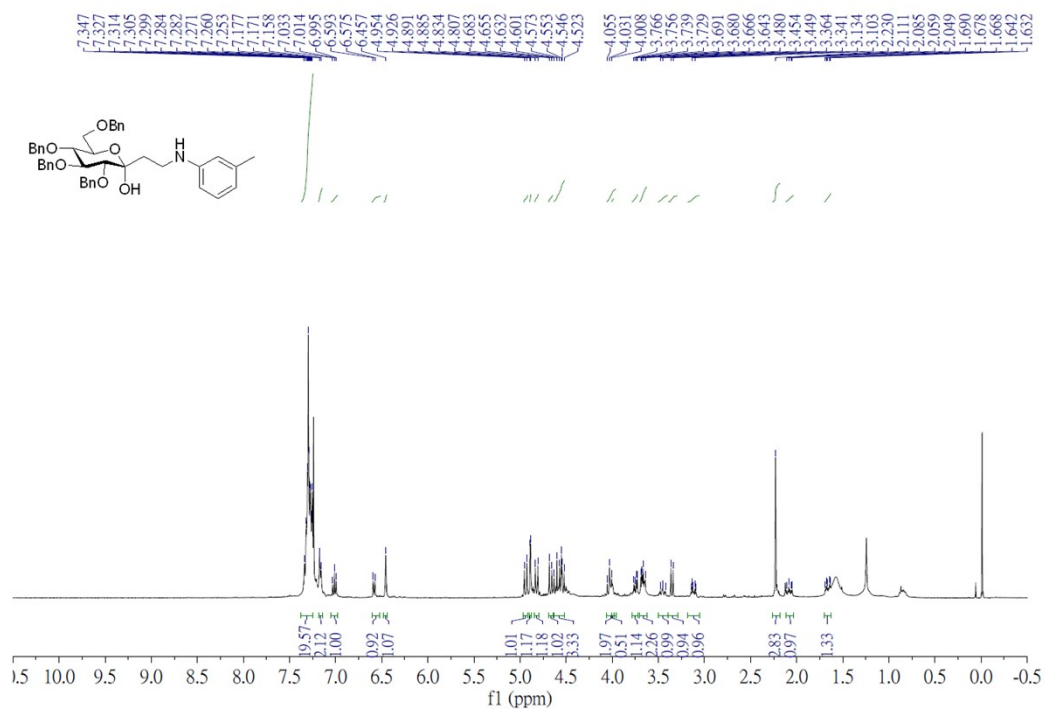

<sup>13</sup>C NMR spectra of **3j**

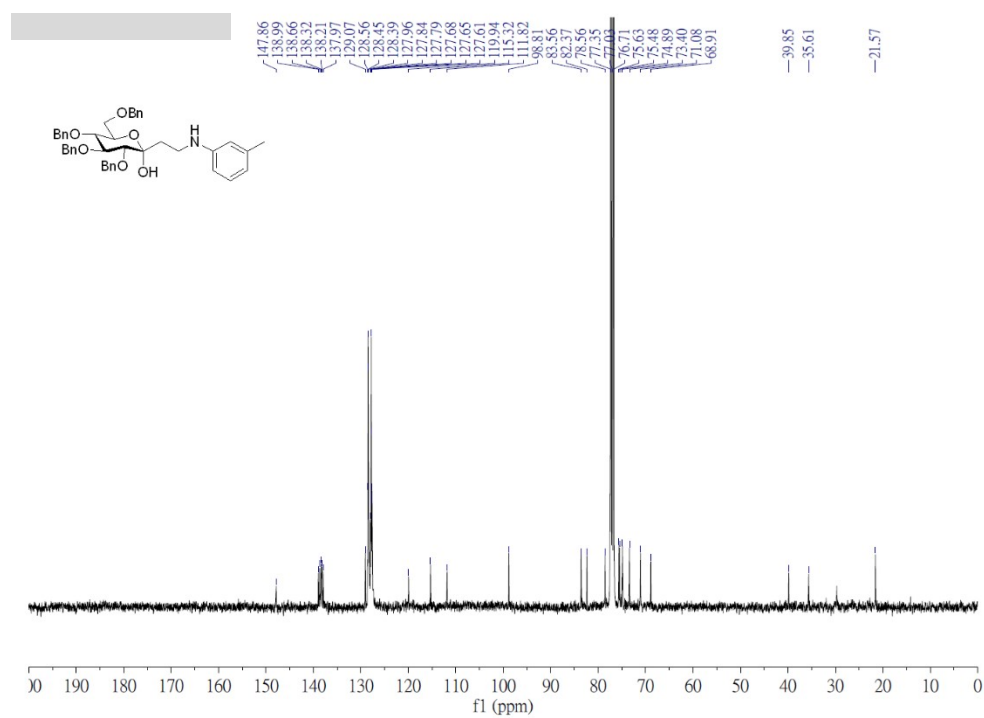

# <sup>1</sup>H NMR spectrum of 3k

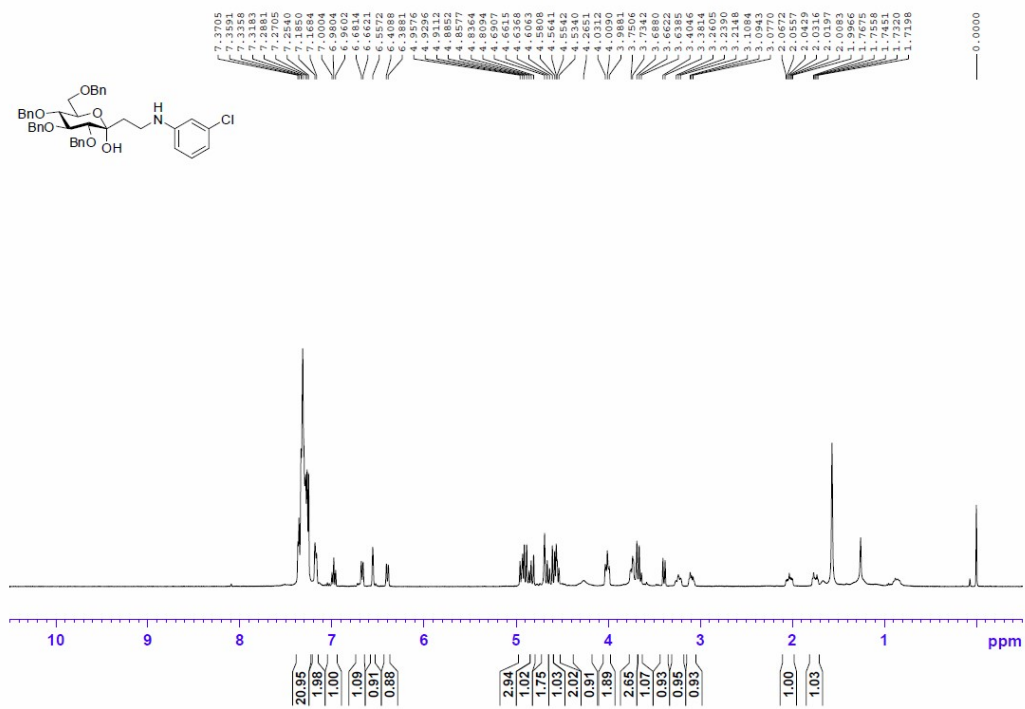

# <sup>13</sup>C NMR spectra of 3k

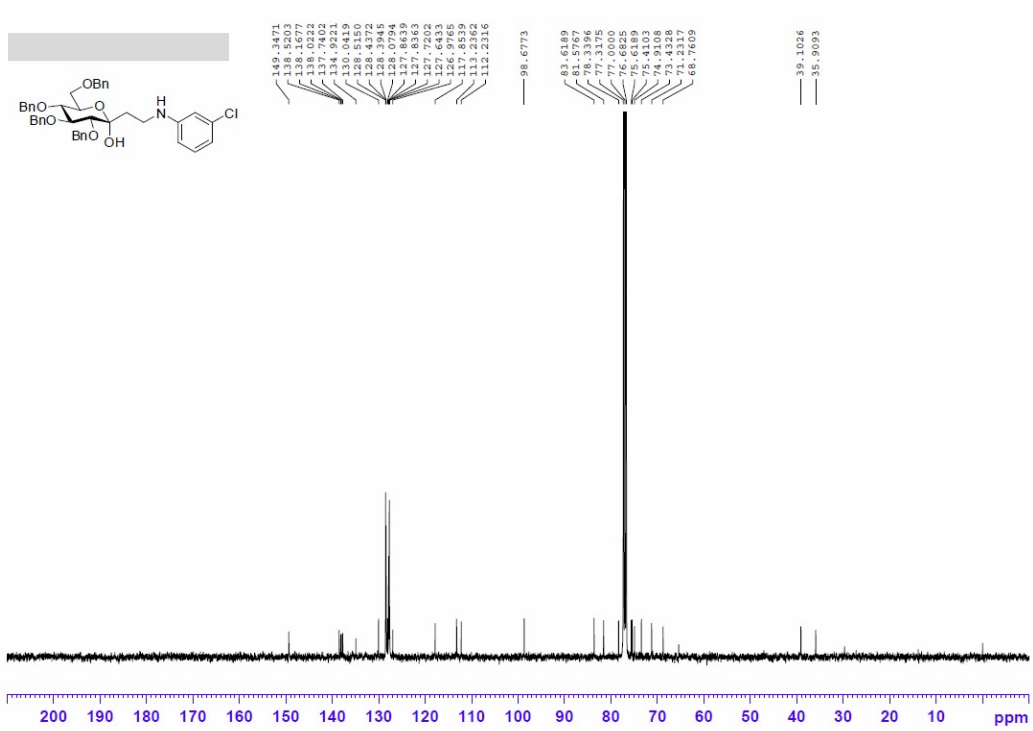

# <sup>1</sup>H NMR spectrum of 31

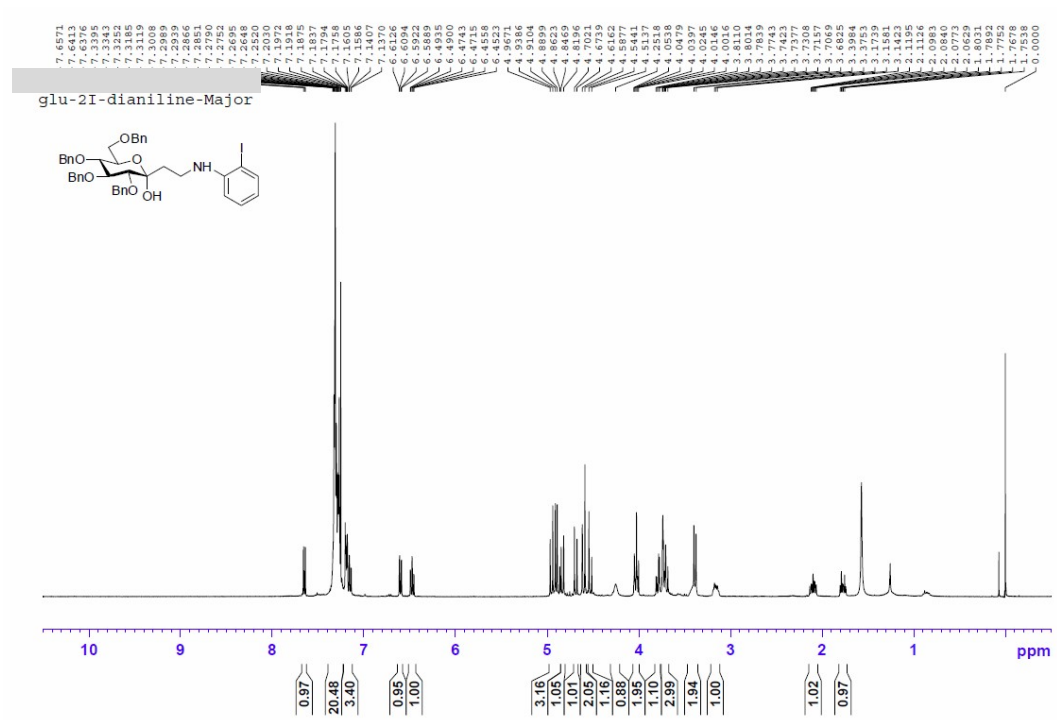

# <sup>13</sup>C NMR spectra of 31

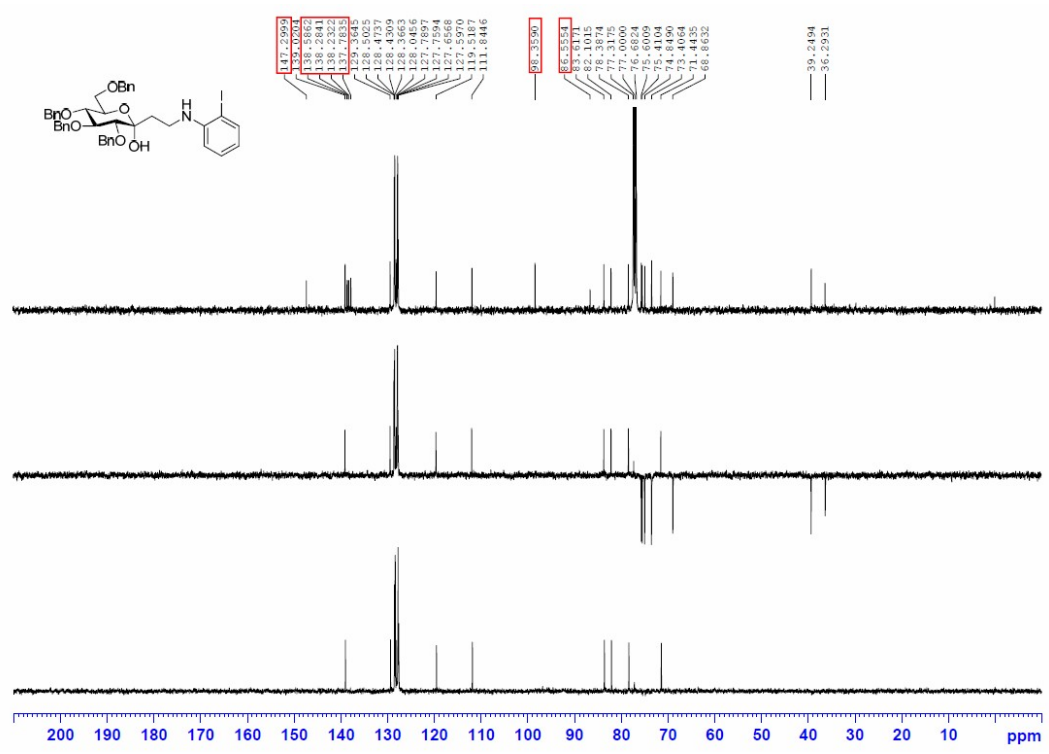

### $^1\text{H}$ NMR spectrum of **3m**

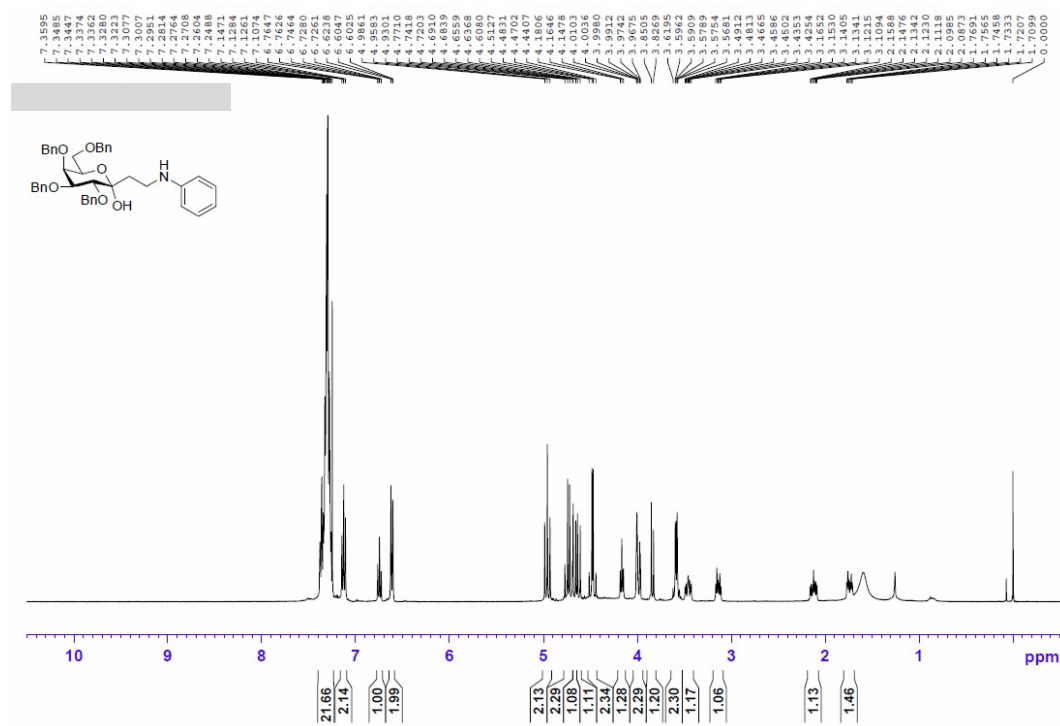

### $^{13}\text{C}$ NMR spectra of **3m**

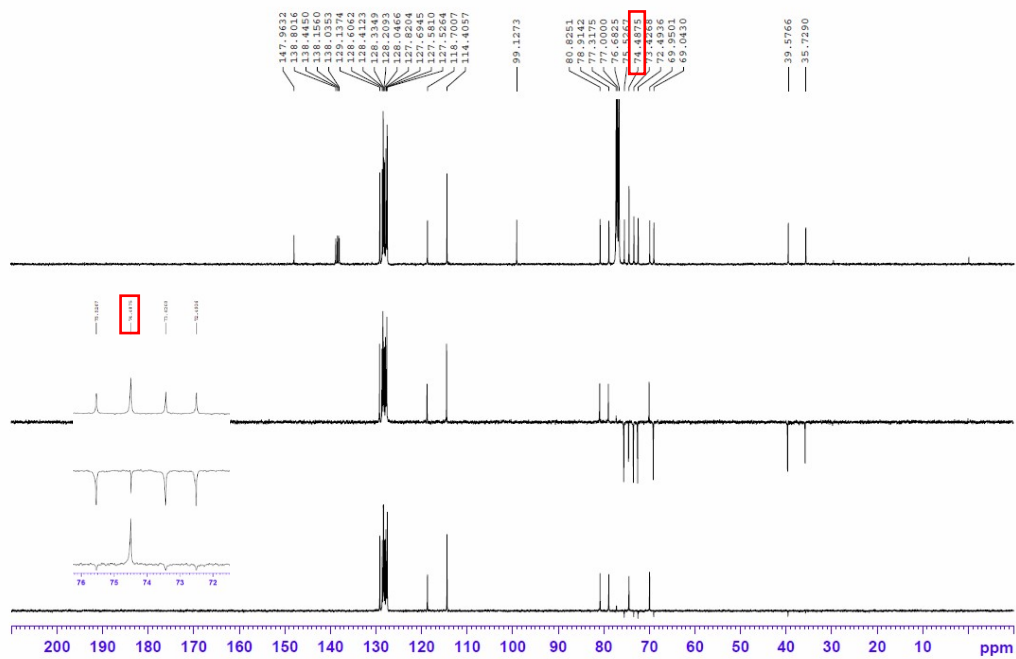

# <sup>1</sup>H NMR spectrum of 3n

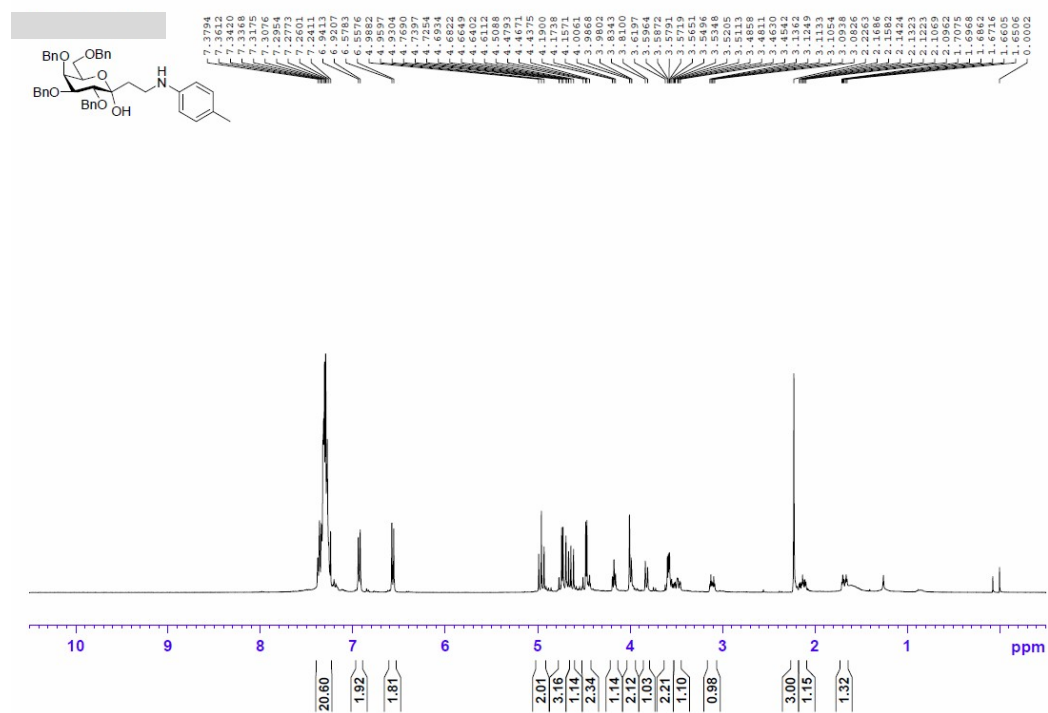

# <sup>13</sup>C NMR spectra of 3n

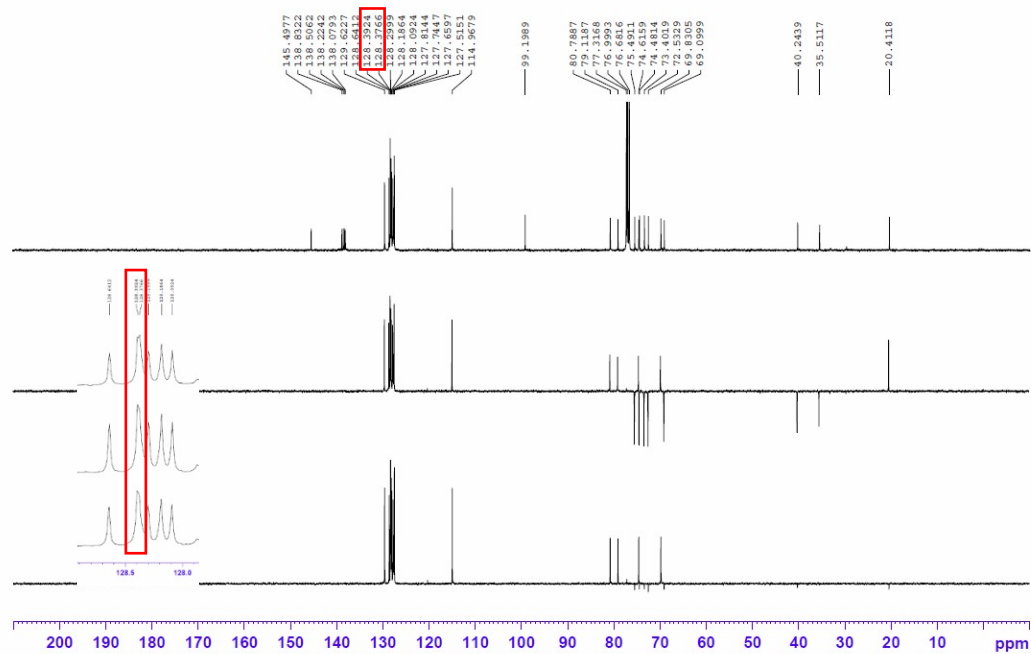



### <sup>1</sup>H NMR spectrum of 3p

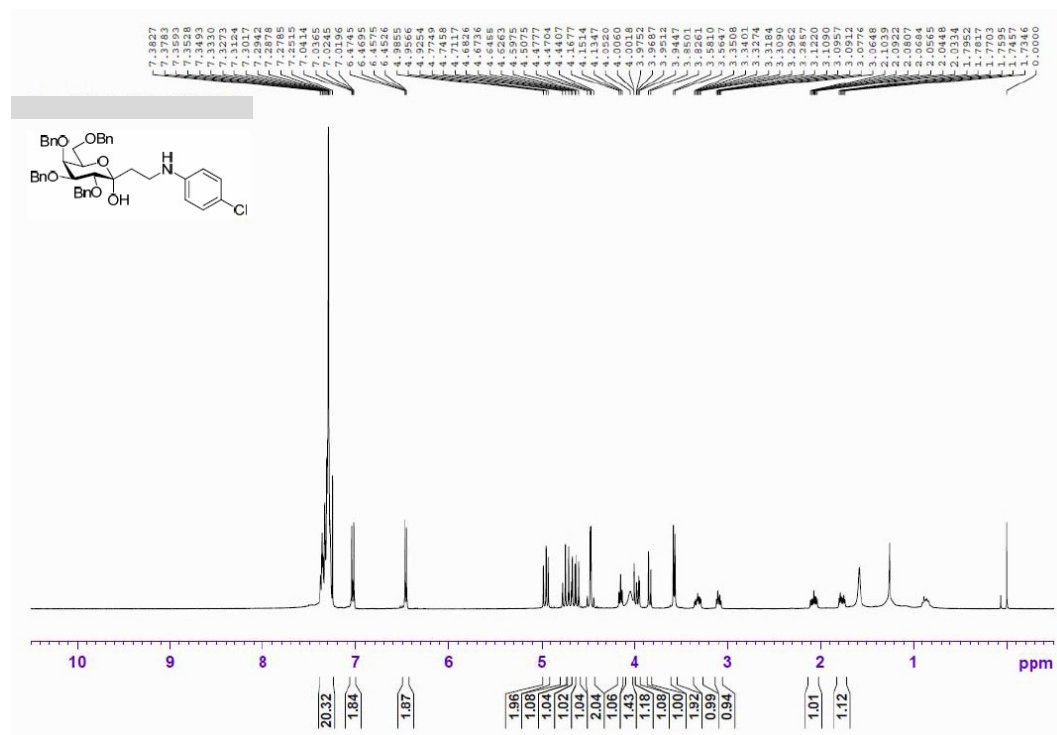

### <sup>13</sup>C NMR spectra of 3p

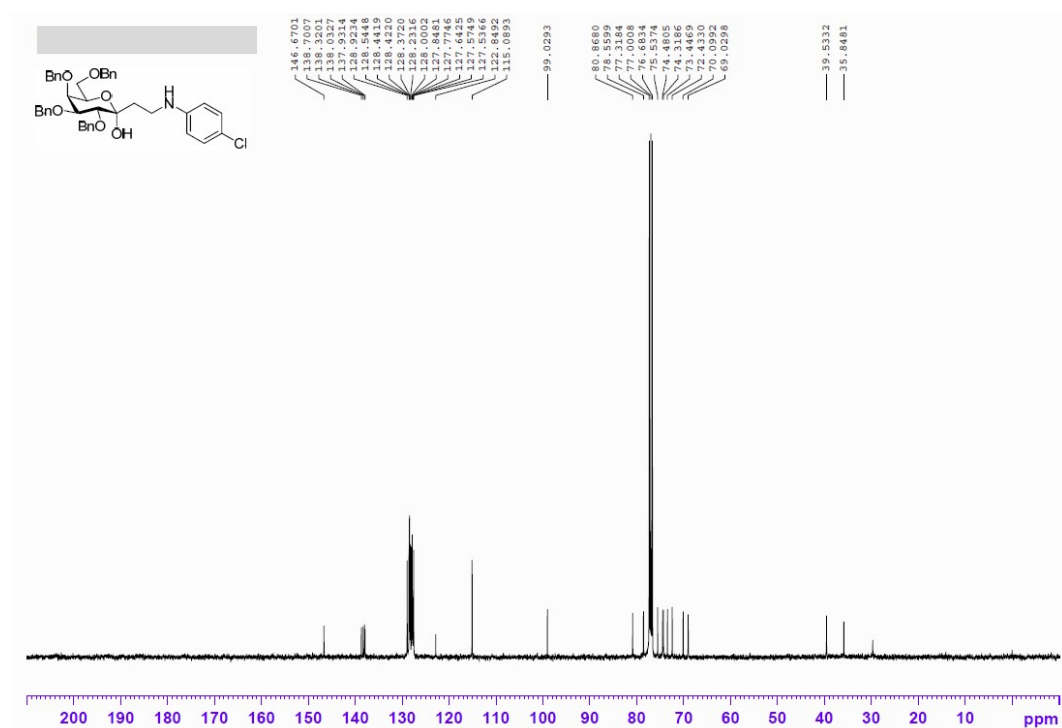

### <sup>1</sup>H NMR spectrum of 3q

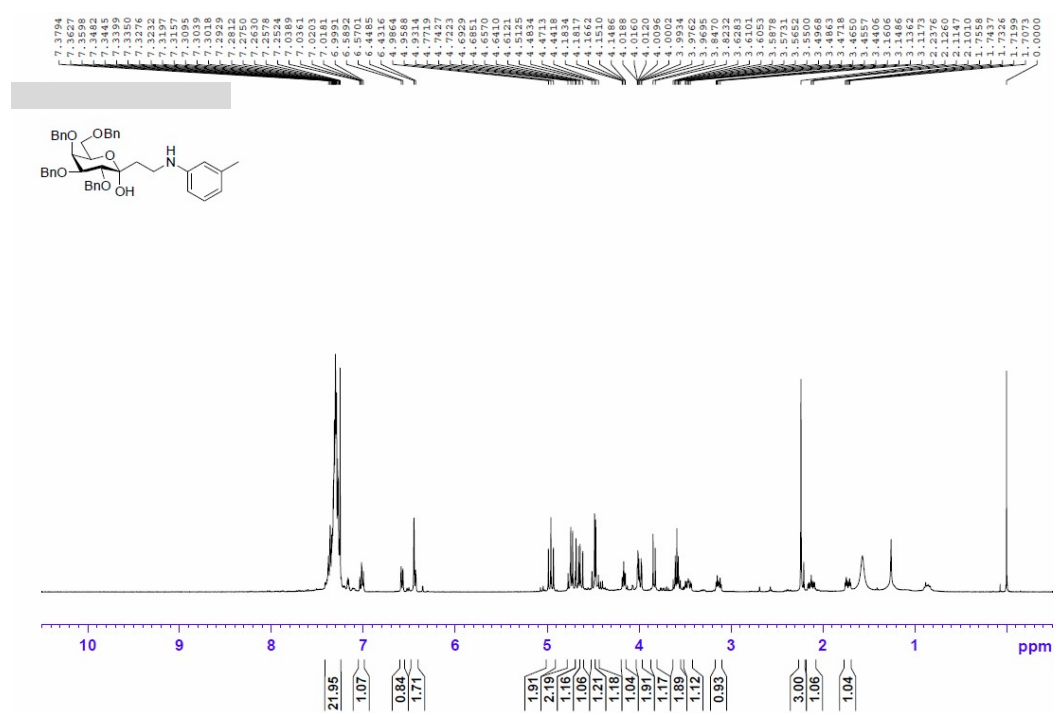

### <sup>13</sup>C NMR spectra of 3q

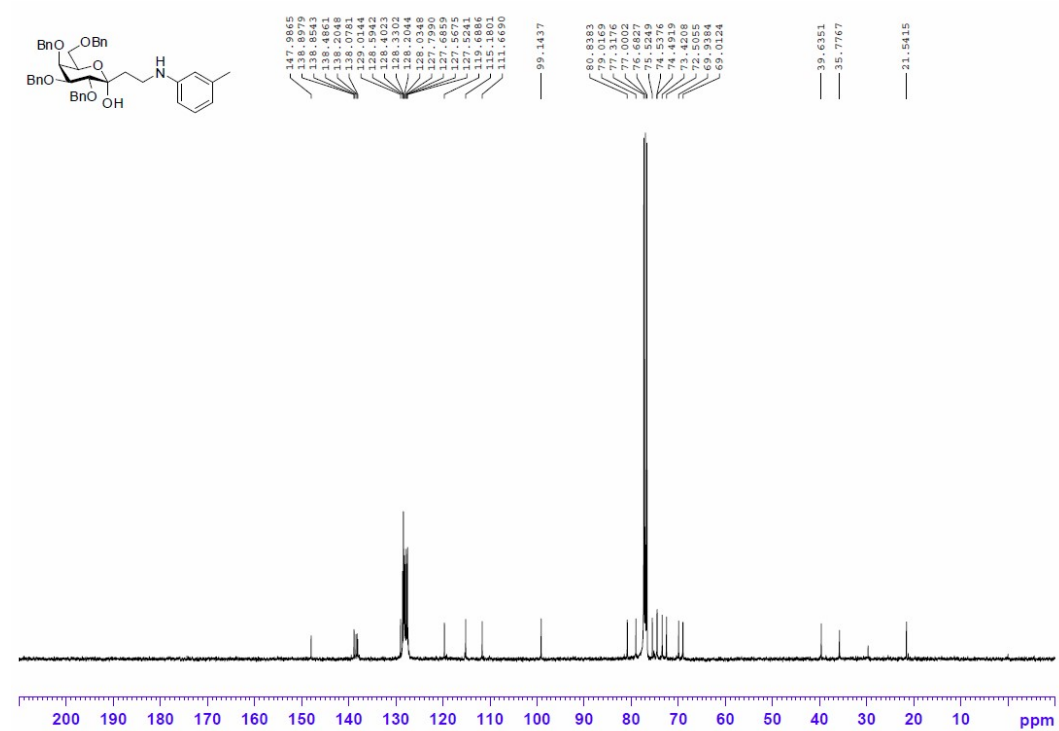

<sup>1</sup>H NMR spectrum of **3r**

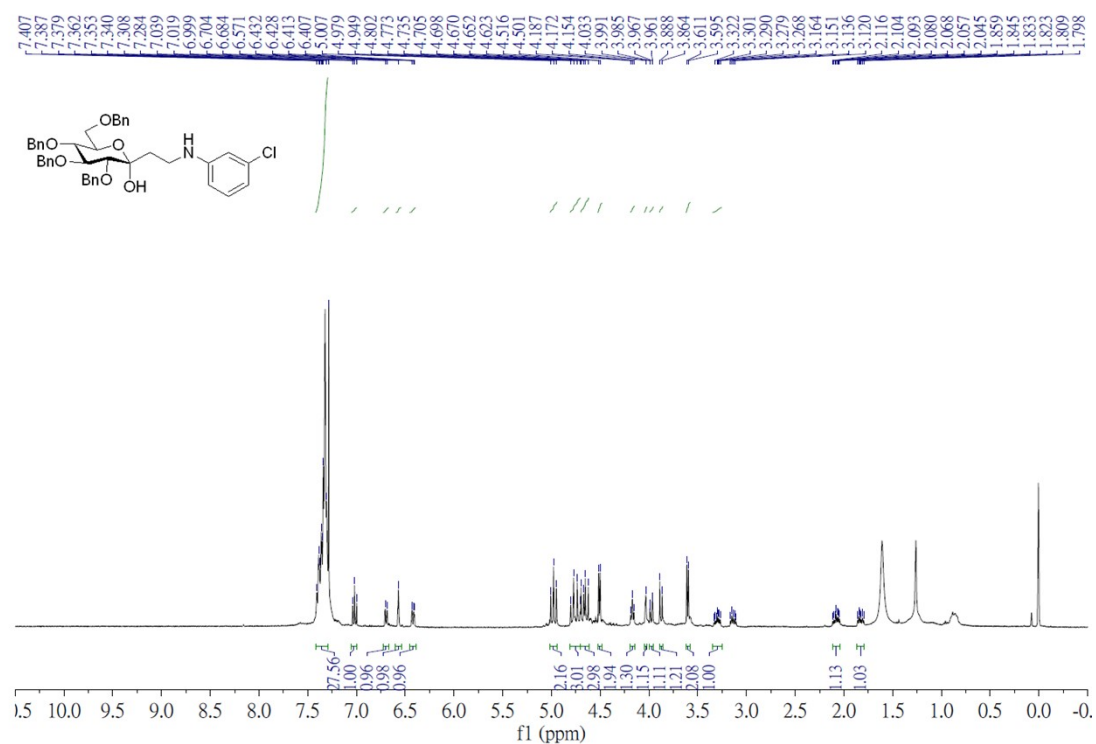

<sup>13</sup>C NMR spectra of **3r**

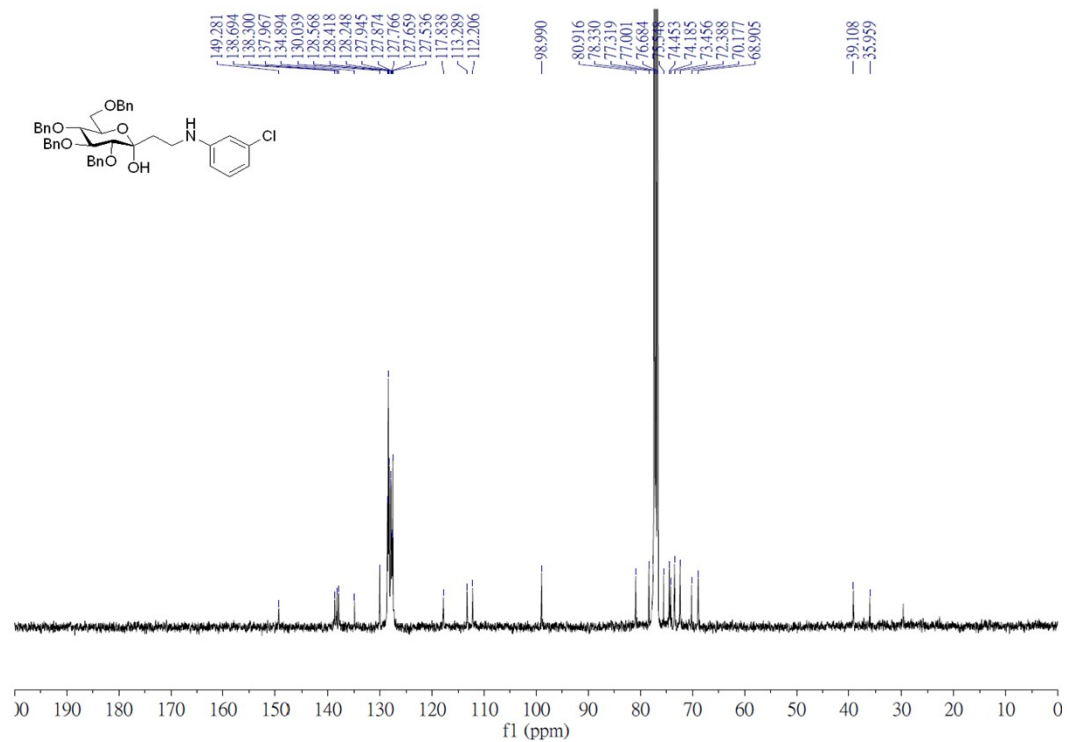

# $^1\text{H}$ and $^{13}\text{C}$ NMR spectra of 4a-4y

## $^1\text{H}$ NMR spectrum of 4a

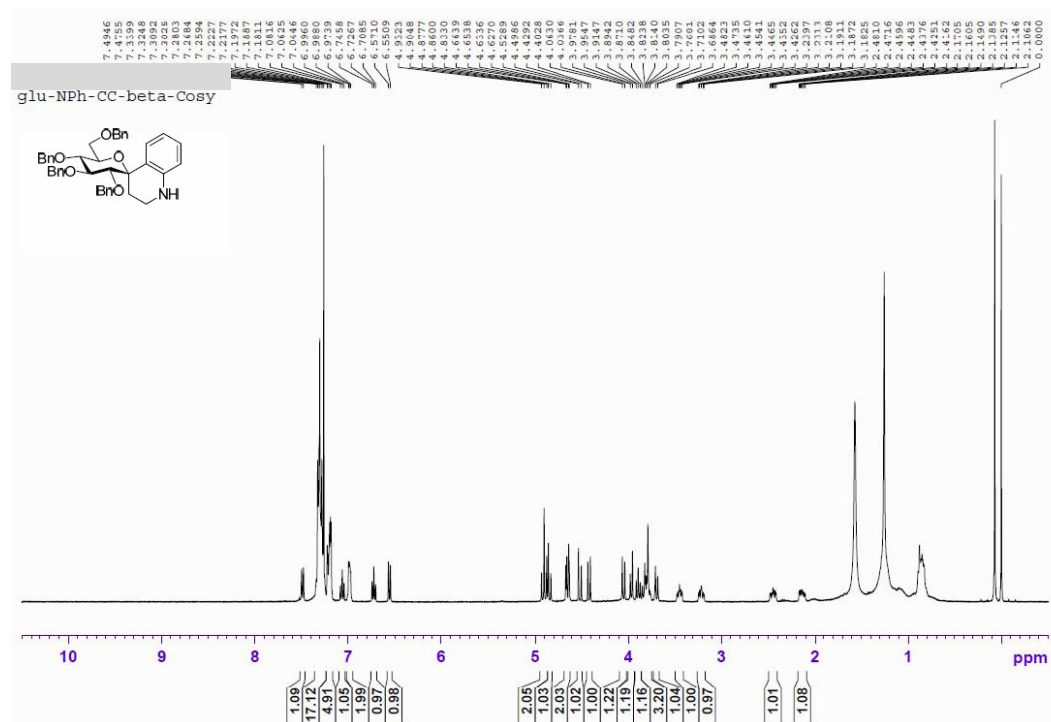

## $^{13}\text{C}$ NMR spectra of 4a

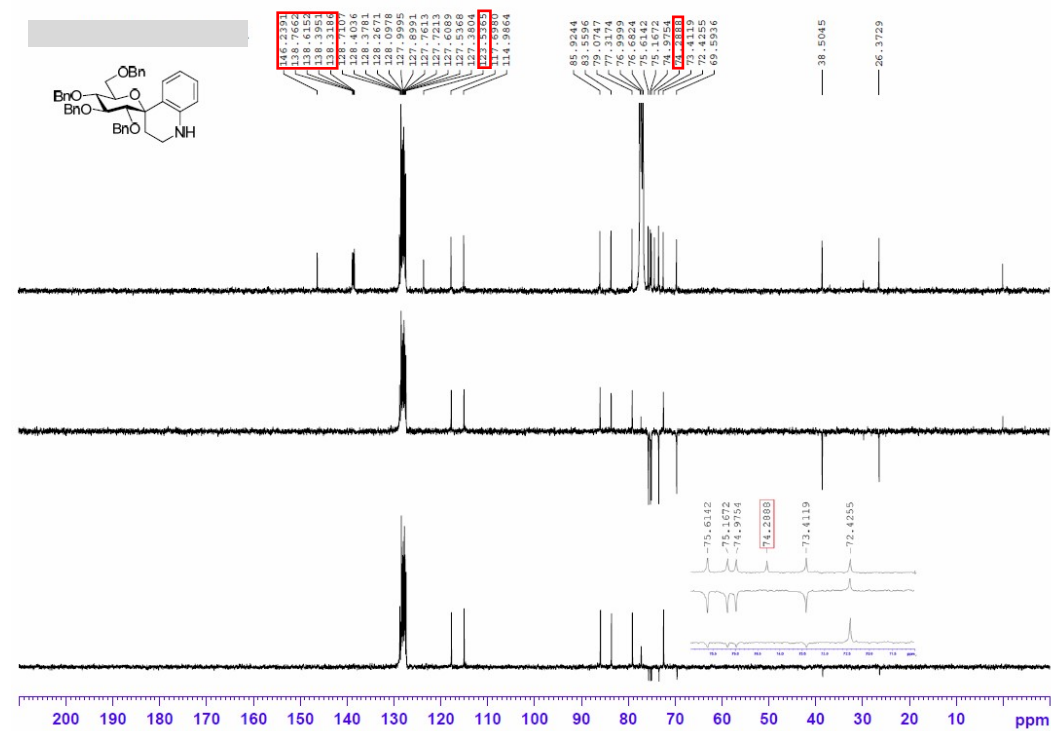

## 2D NMR spectra of 4a

### H-H COSY NMR spectrum of 4a

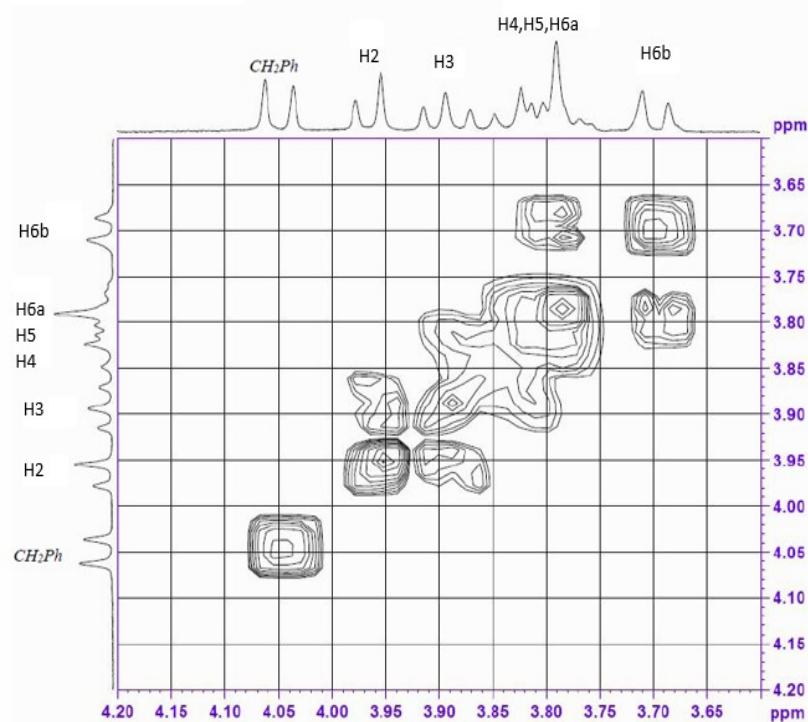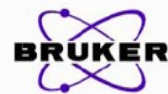

```

NAME      glu-NPr-CC-beta-cosy
EXPNO    2
PROCNO   1
Date_    20211006
TIME     9.51 h
INSTRUM  AvanceS500
PROBHD   Z163735 0291 (
PULPROG  coesypppgpr
TD       32768
SOLVENT  CDCl3
NS       8
DS       16
SWH      1263.158 Hz
FIDRES   2.139802 Hz
AQ       0.1946100 sec
RG       64
TM       95.600 usec
EX       6.50 usec
TE       296.4 K
D0       0.0000200 sec
D1       1.5000000 sec
D11      0.1300000 sec
D12      0.0000200 sec
D13      0.0000400 sec
D14      0.0002000 sec
D15      0.0019600 sec
NUC1     1
NUC2     1
SFO1     400.1524 MHz
FIDRES   26.559210 Hz
AQ       13.163 ppm
PROMODE  QP
SI       1624
SF       400.1500100 MHz
WDW      QFHM
SSB      0
LB       0.00 Hz
GB       0
PC       1.40
SI       1624
MC2      QP
SF       400.1500100 MHz
WDW      QFHM
SSB      0
LB       0.00 Hz
GB       0
  
```

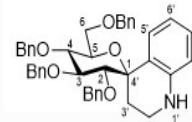

### NOESY NMR spectrum of 4a

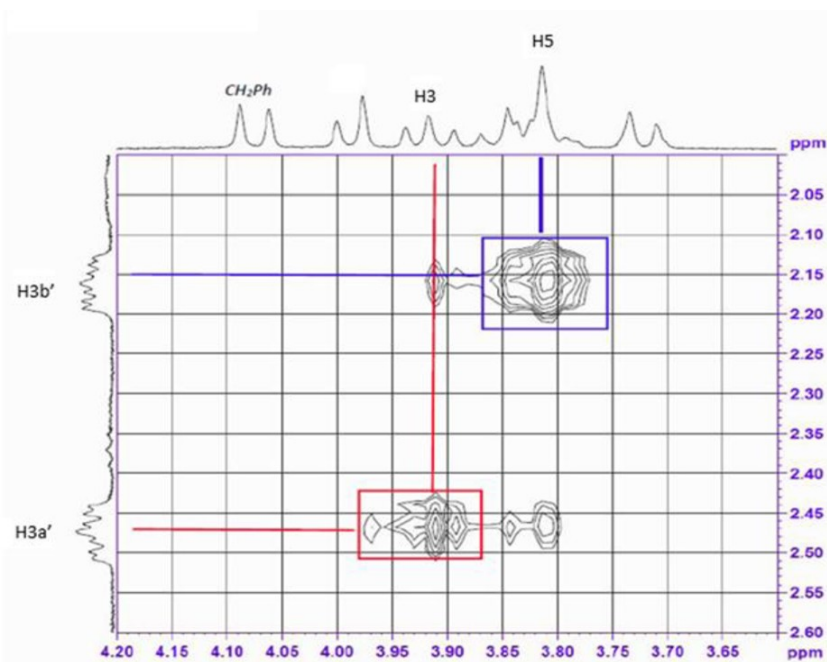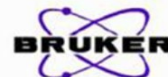

```

NAME      glu-NPr-CC-beta-NOesy
EXPNO    2
PROCNO   1
Date_    20211025
TIME     18.37 h
INSTRUM  AvanceS500
PROBHD   Z163739 7291 (
PULPROG  noesypppgpr
TD       32768
SOLVENT  CDCl3
NS       8
DS       16
SWH      1263.254 Hz
FIDRES   2.139248 Hz
AQ       0.1946100 sec
RG       64
TM       128.000 usec
TE       300.1 K
D0       0.0001500 sec
D1       1.5000000 sec
D11      0.1300000 sec
D12      0.0000200 sec
D13      0.0000400 sec
D14      0.0002000 sec
D15      0.0019600 sec
NUC1     1
NUC2     1
SFO1     400.15139 MHz
FIDRES   22.184805 Hz
AQ       0.037 ppm
PROMODE  QP
SI       1624
SF       400.1500000 MHz
WDW      QFHM
SSB      0
LB       0.00 Hz
GB       0
PC       1.00
SI       1624
MC2      QP
SF       400.1500000 MHz
WDW      QFHM
SSB      0
LB       0.00 Hz
GB       0
  
```

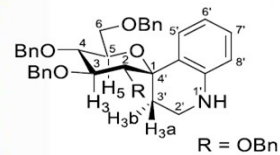

<sup>1</sup>H NMR spectrum of **4b**

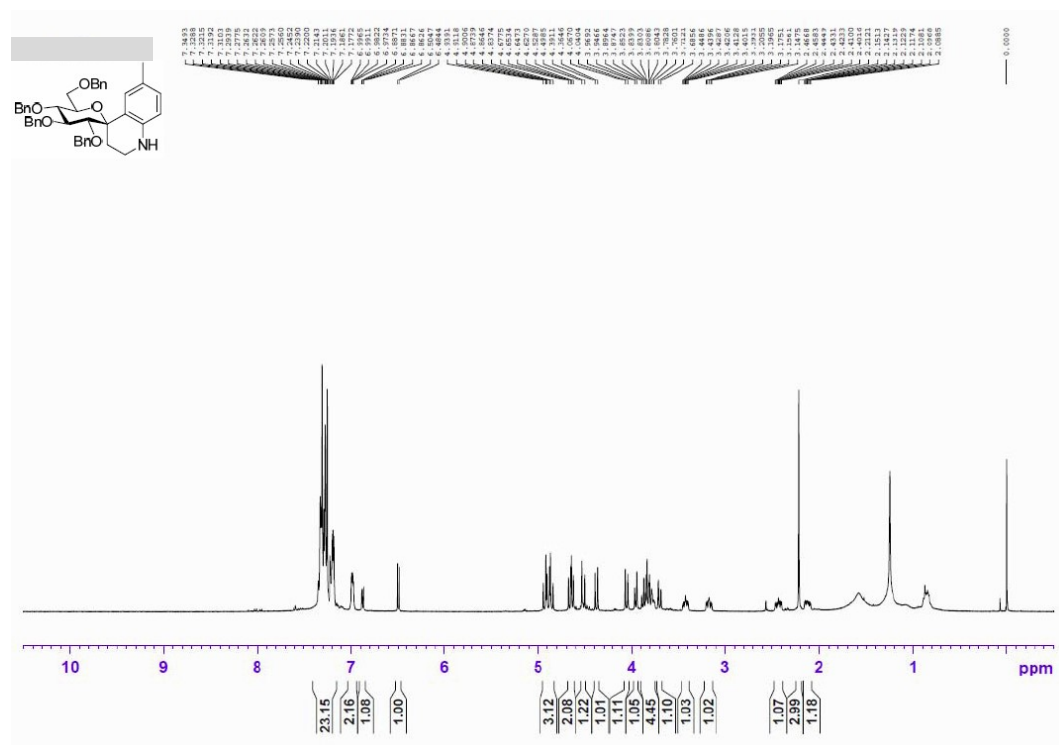

<sup>13</sup>C NMR spectra of **4b**

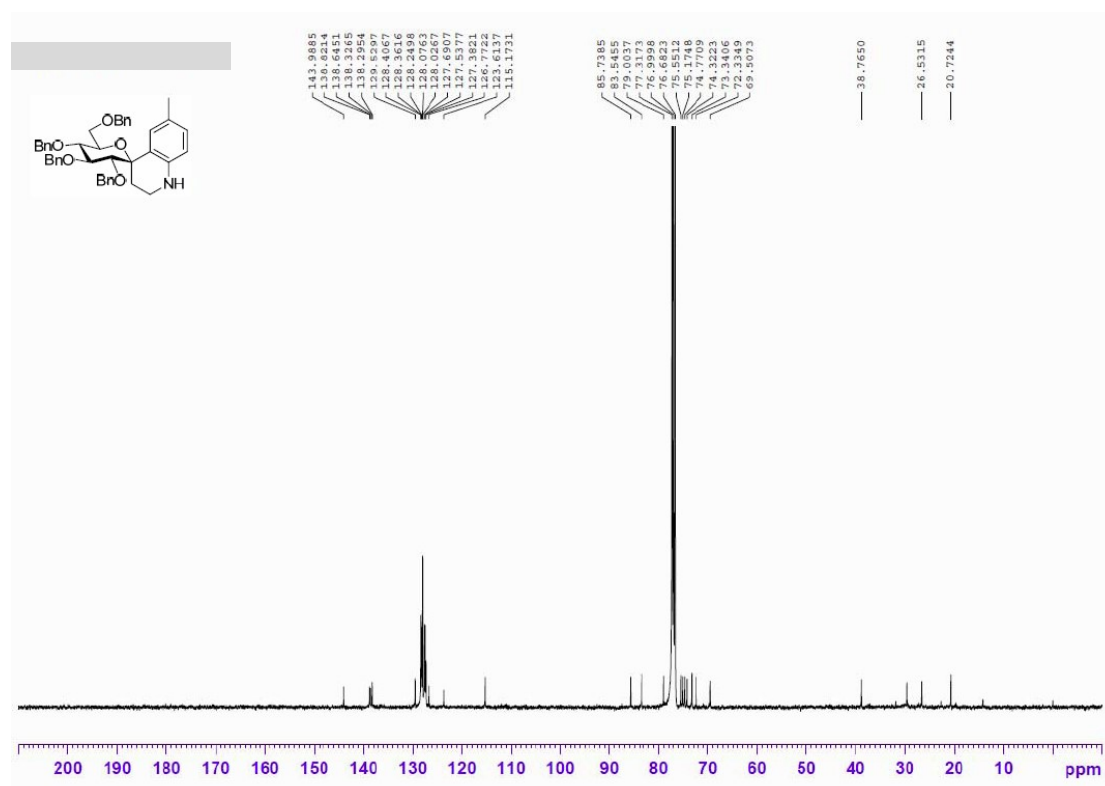

# <sup>1</sup>H NMR spectrum of 4c

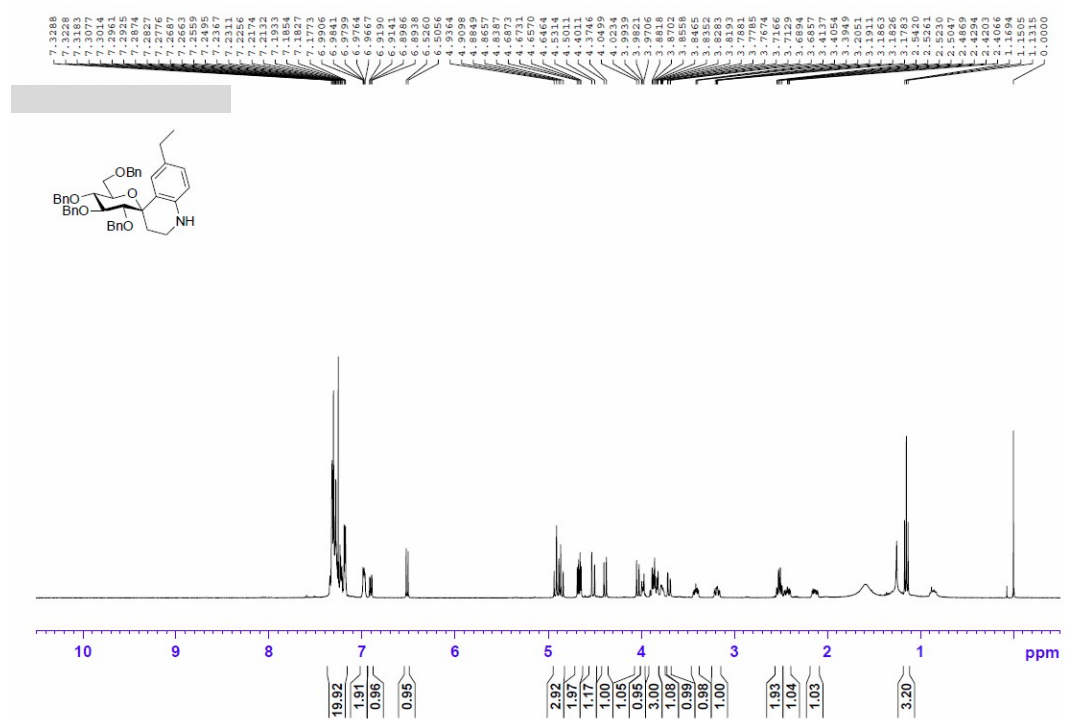

# <sup>13</sup>C NMR spectra of 4c

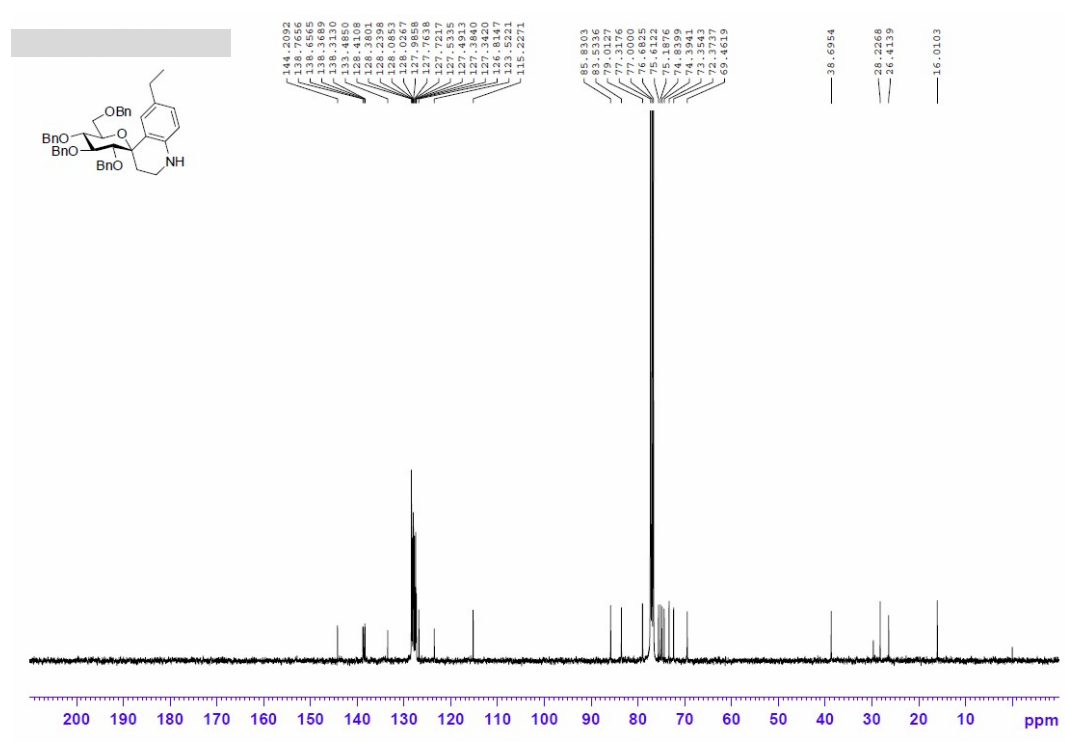

<sup>1</sup>H NMR spectrum of **4d**

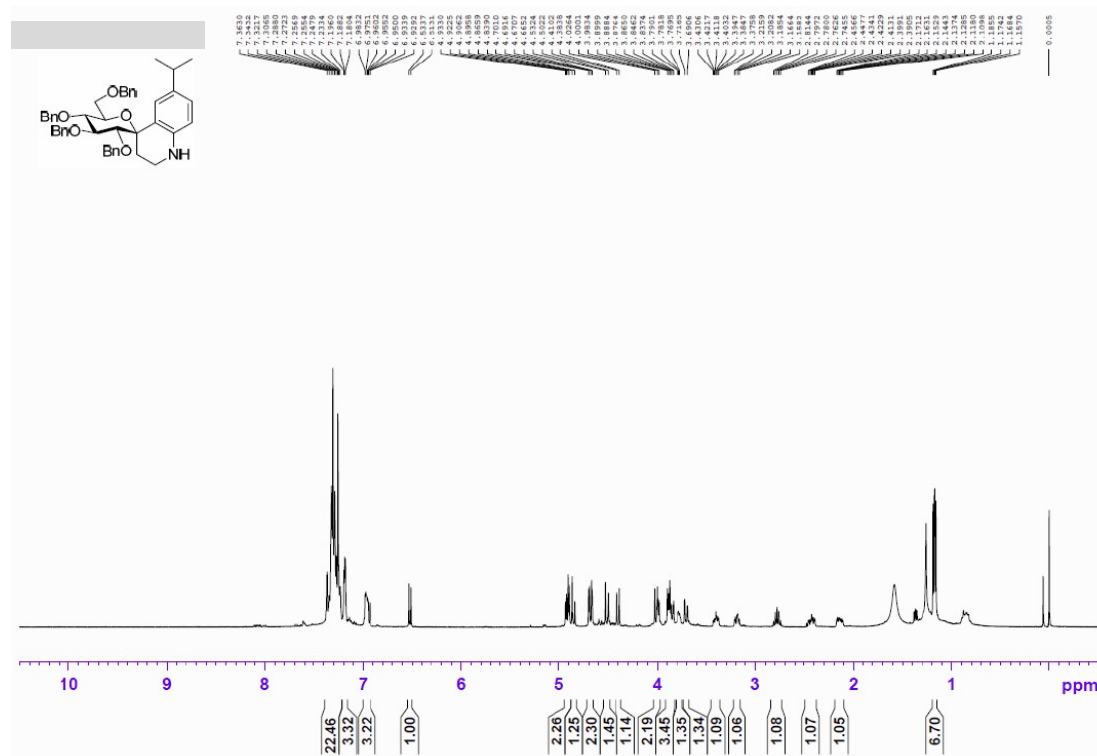

<sup>13</sup>C NMR spectra of **4d**

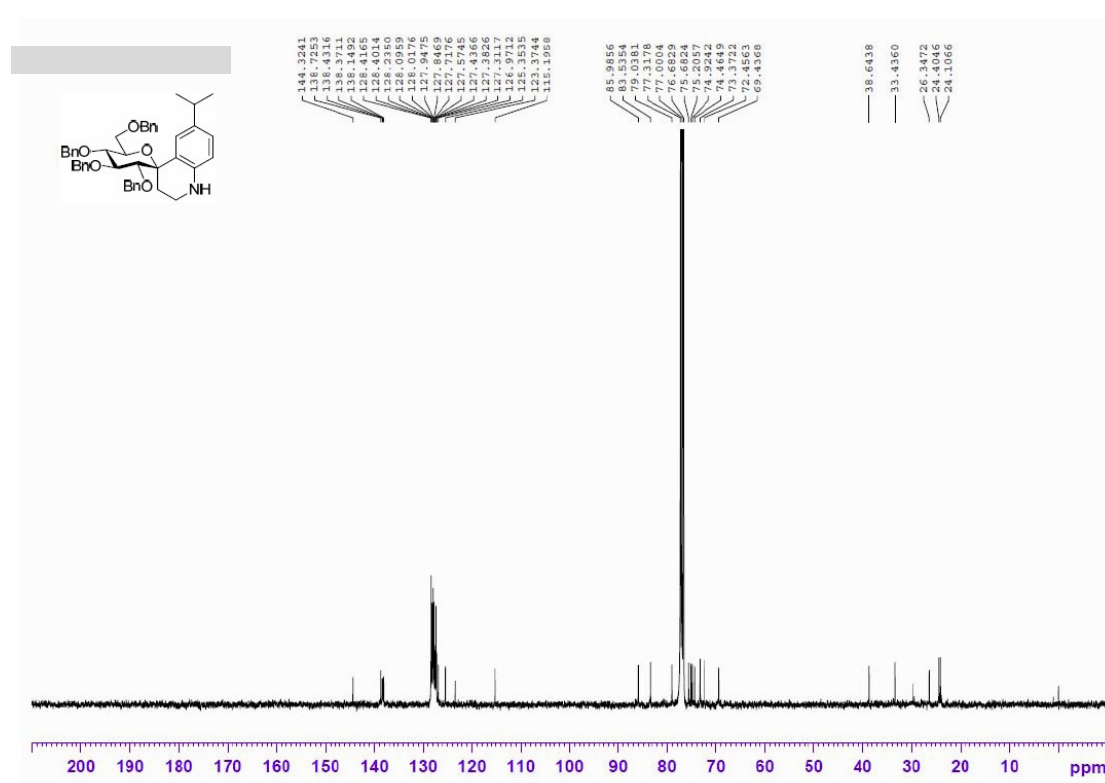

<sup>1</sup>H NMR spectrum of 4e

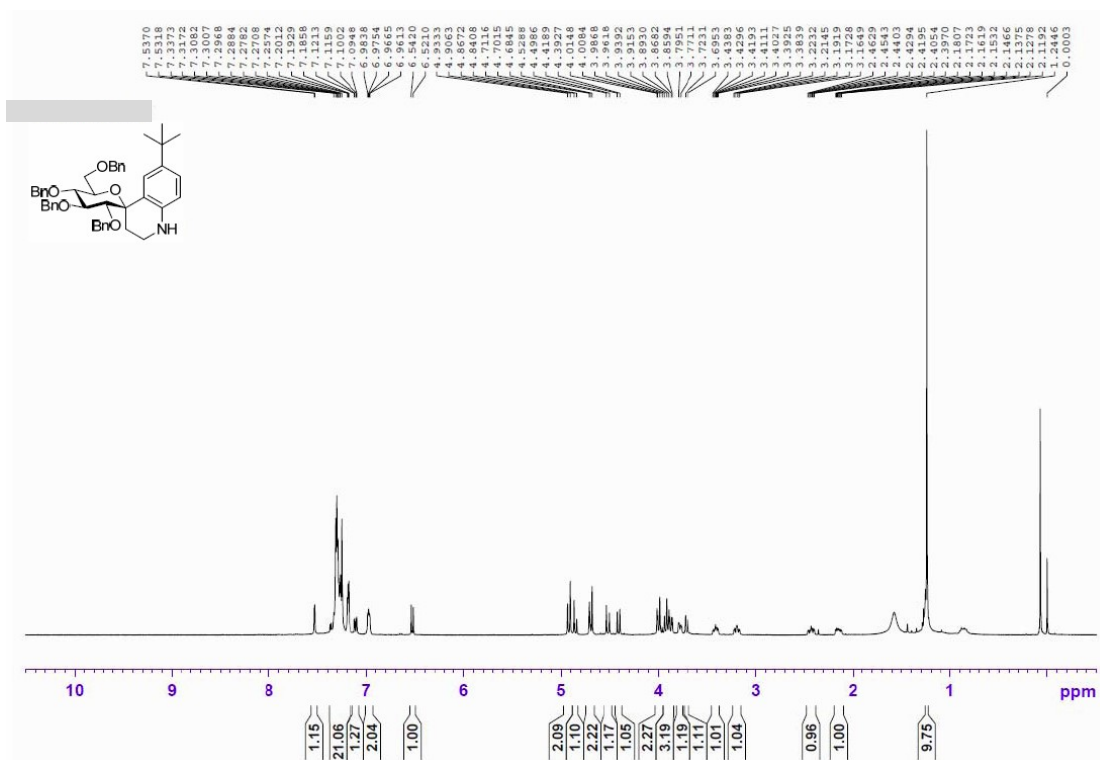

<sup>13</sup>C NMR spectra of 4e

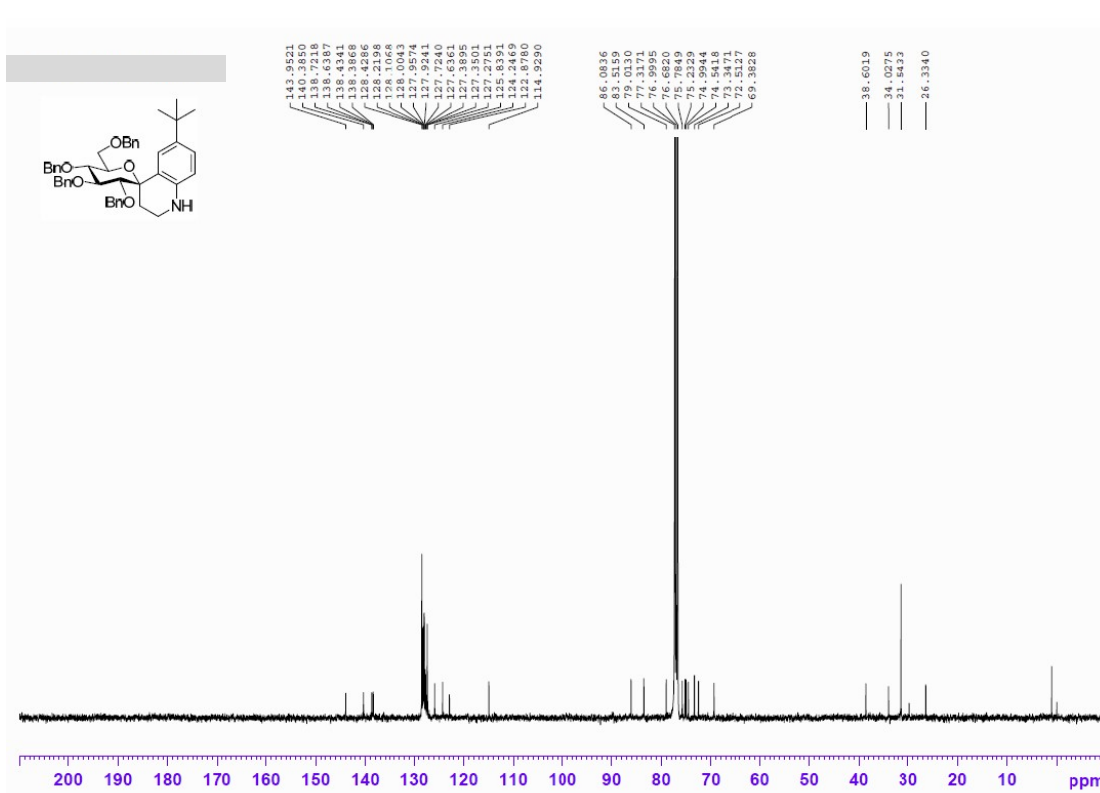

<sup>1</sup>H NMR spectrum of **4f**

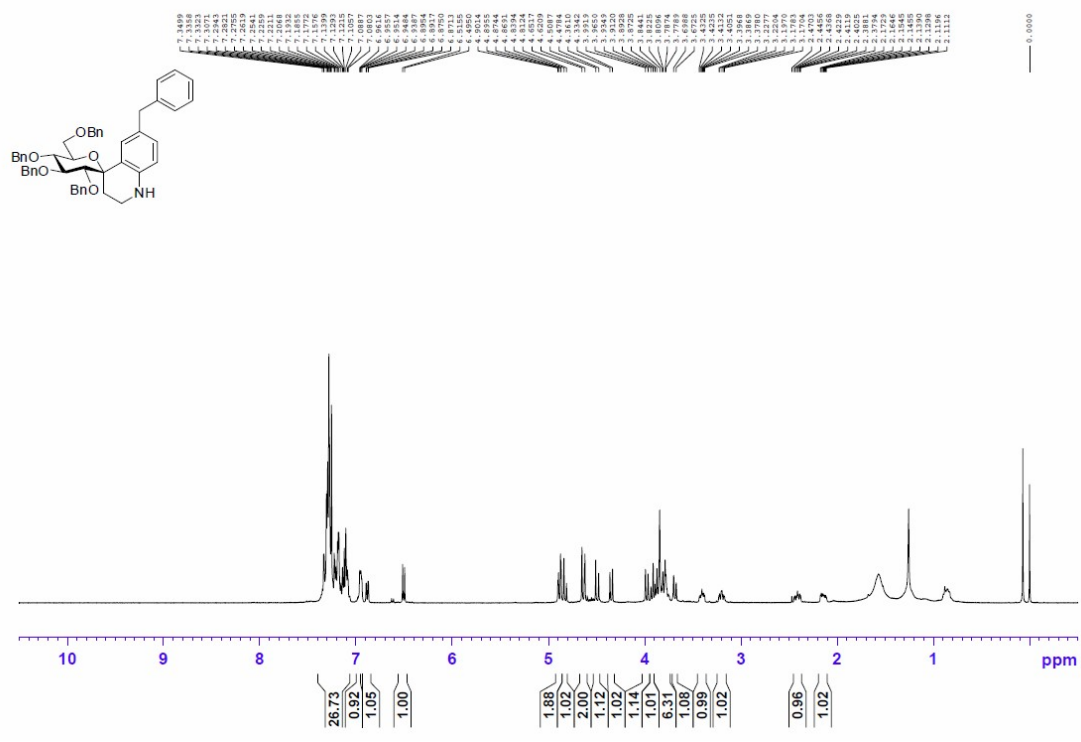

<sup>13</sup>C NMR spectra of **4f**

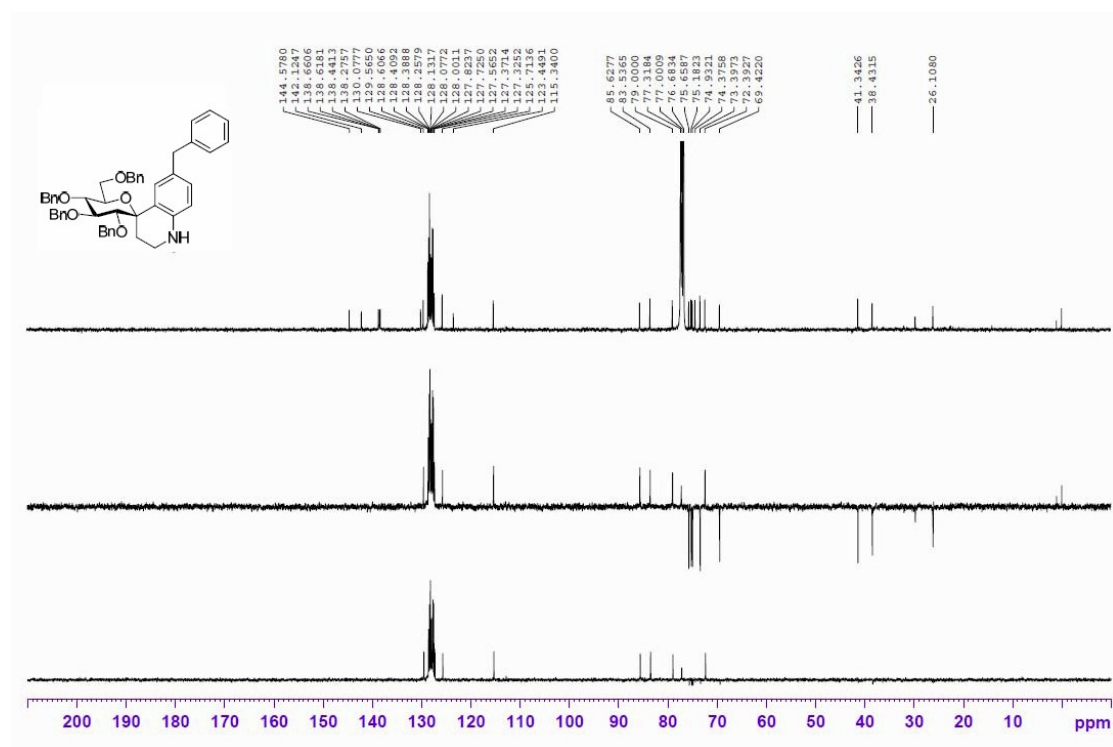

# <sup>1</sup>H NMR spectrum of 4g

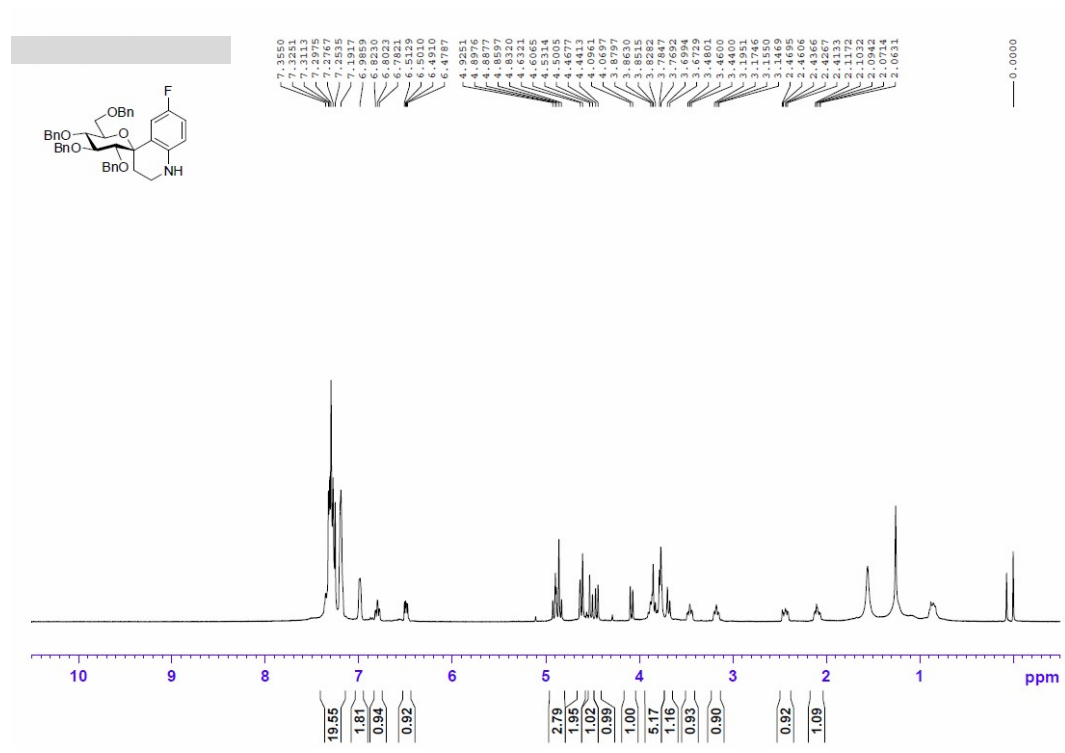

# <sup>13</sup>C NMR spectra of 4g

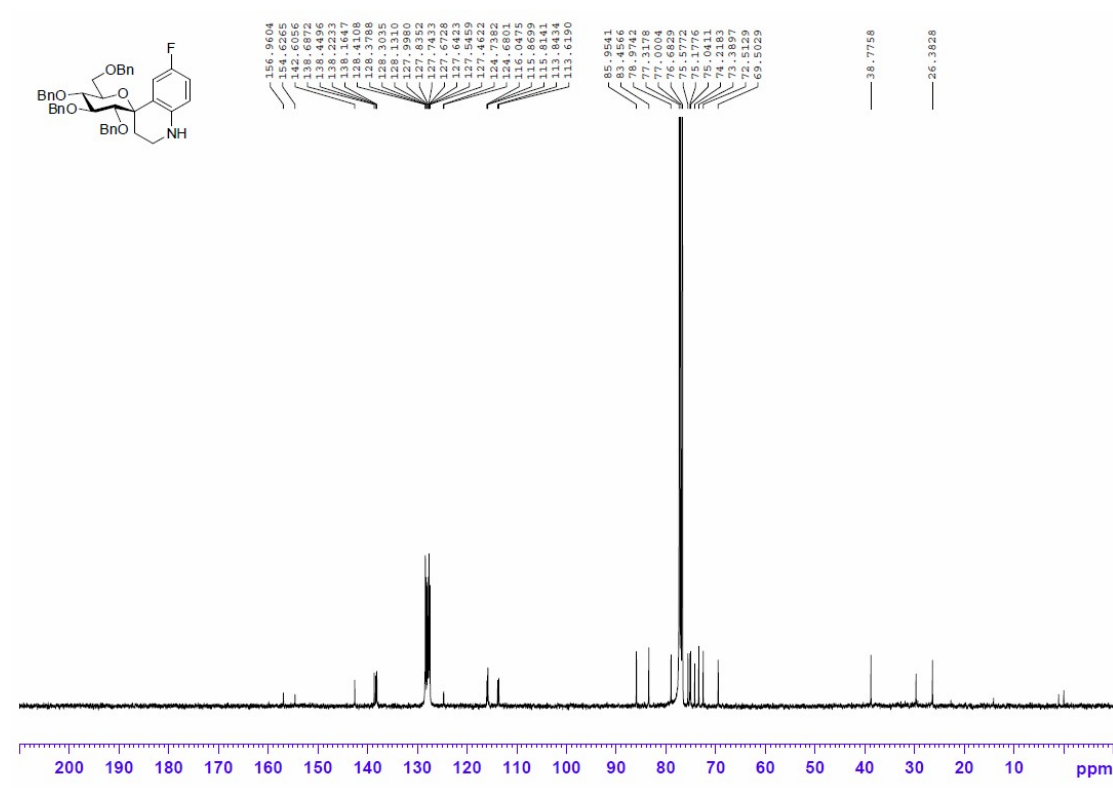



<sup>1</sup>H NMR spectrum of **4i**

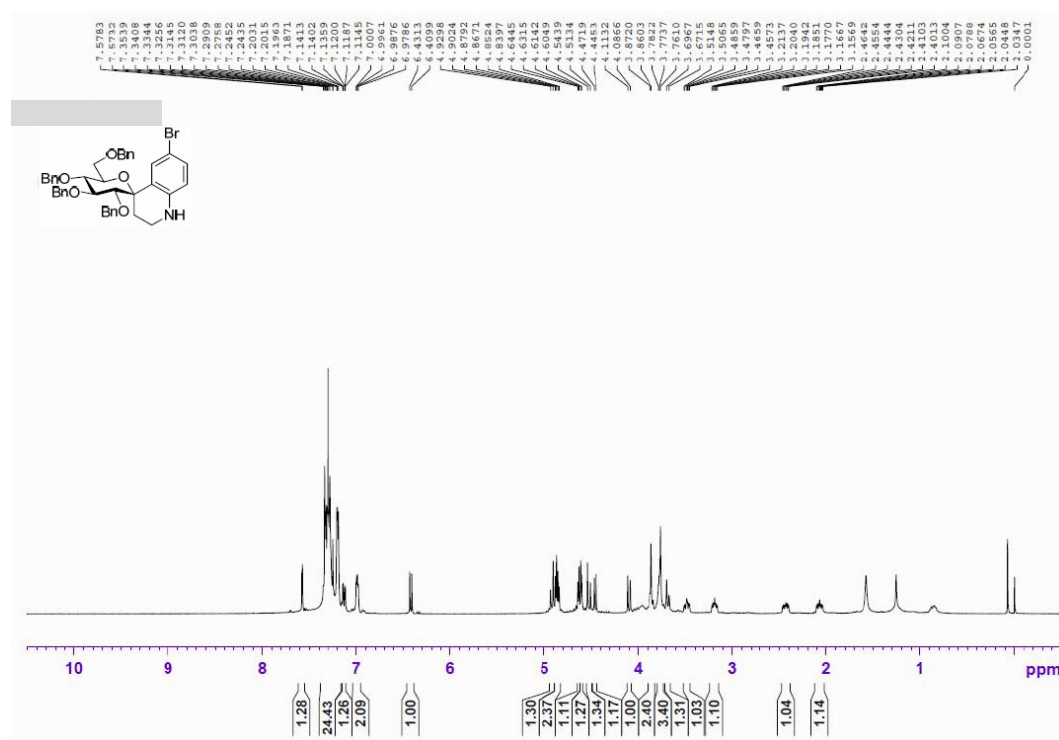

<sup>13</sup>C NMR spectra of **4i**

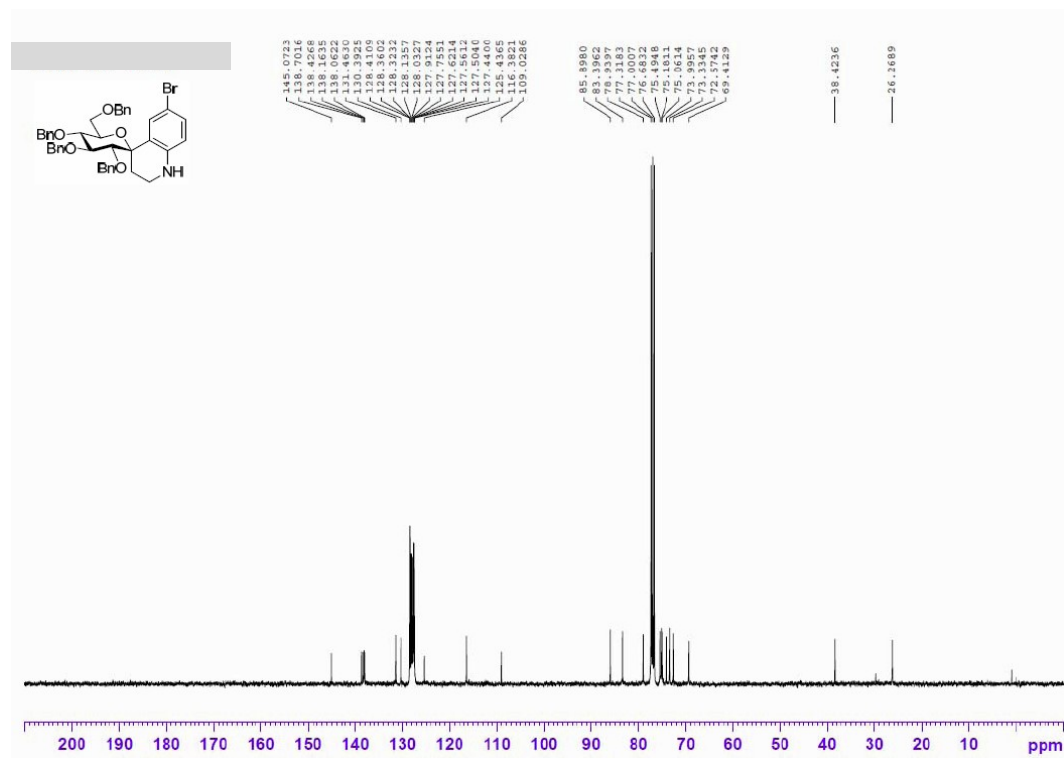

<sup>1</sup>H NMR spectrum of **4j**

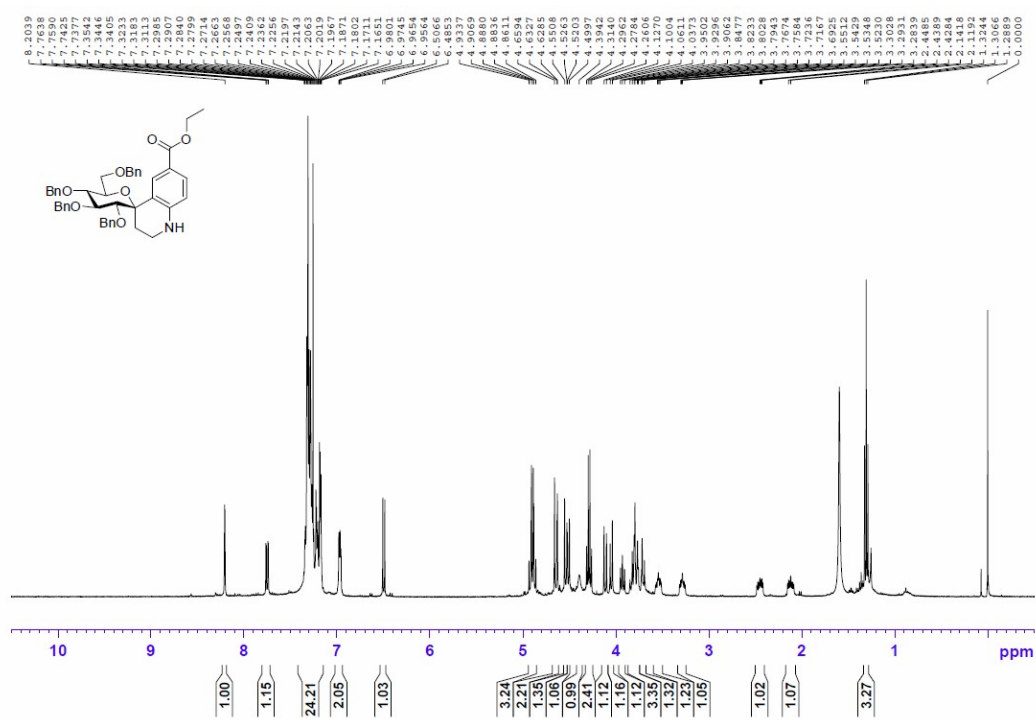

<sup>13</sup>C NMR spectra of **4j**

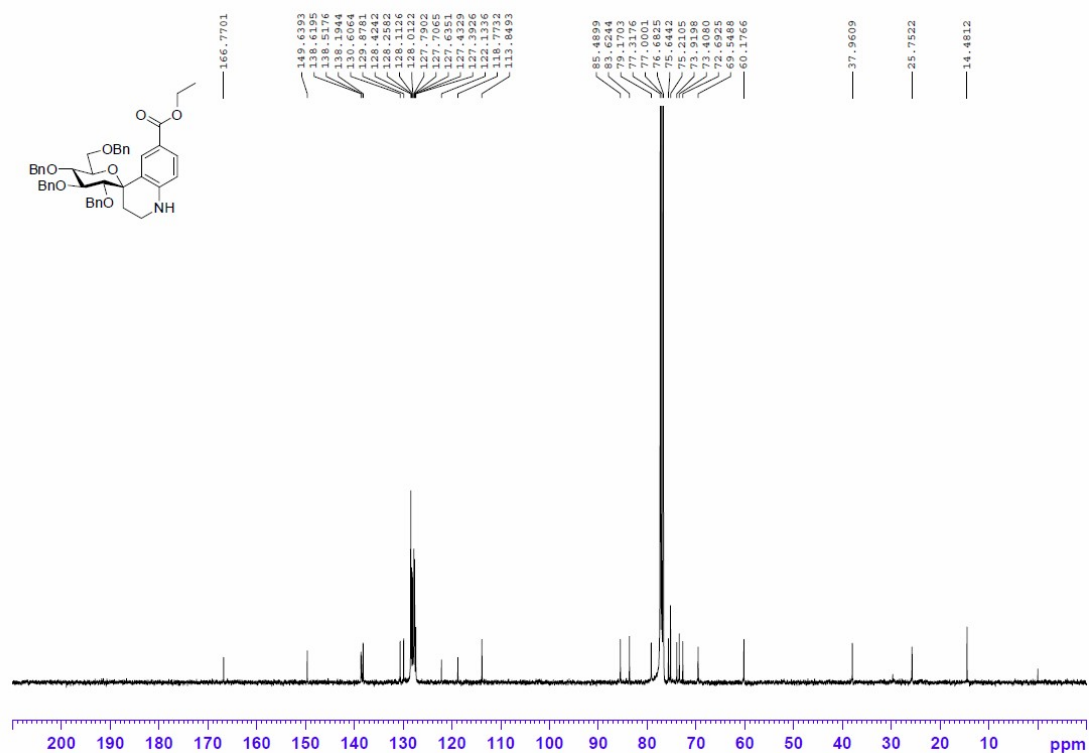

### <sup>1</sup>H NMR spectrum of 4k

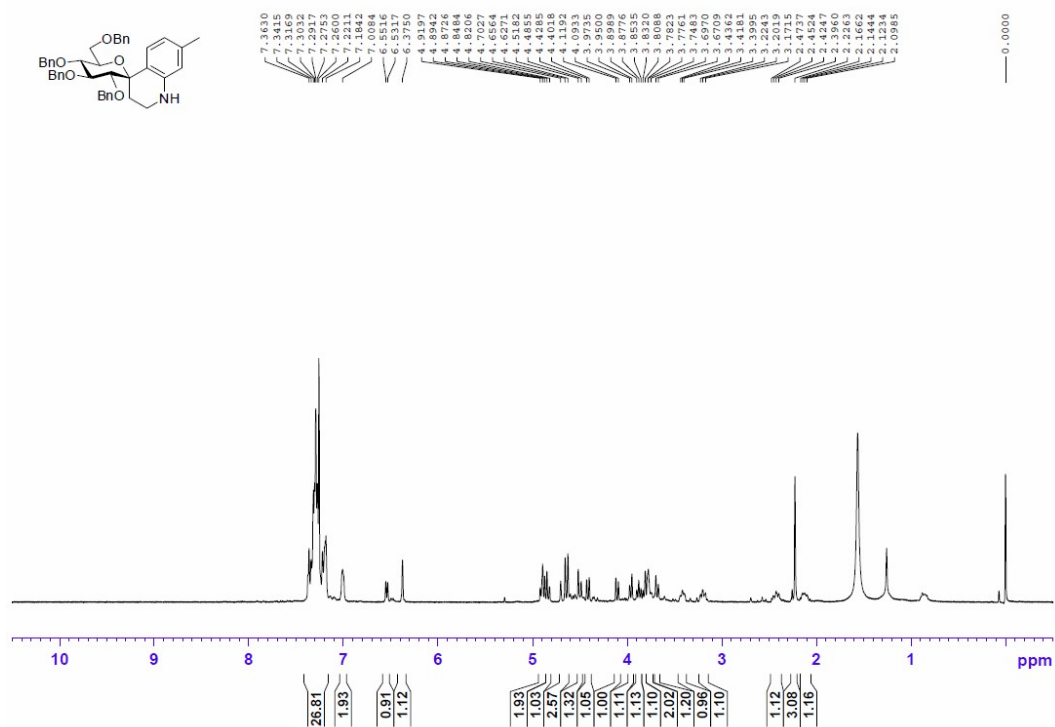

### <sup>13</sup>C NMR spectra of 4k

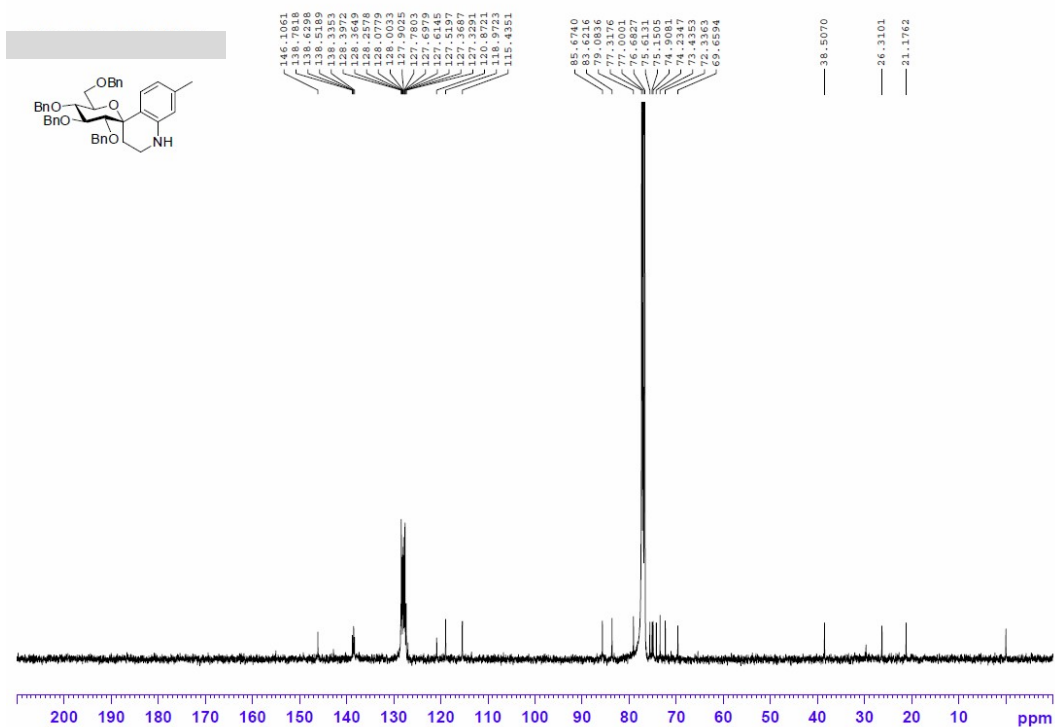









# <sup>1</sup>H NMR spectrum of 4p

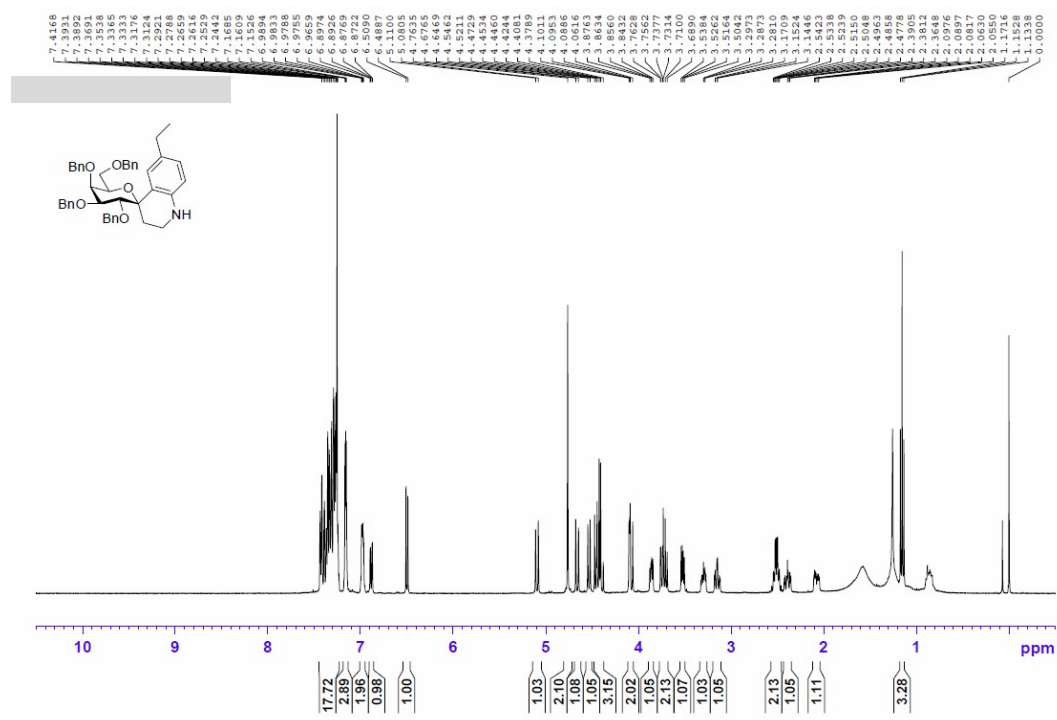

# <sup>13</sup>C NMR spectra of 4p

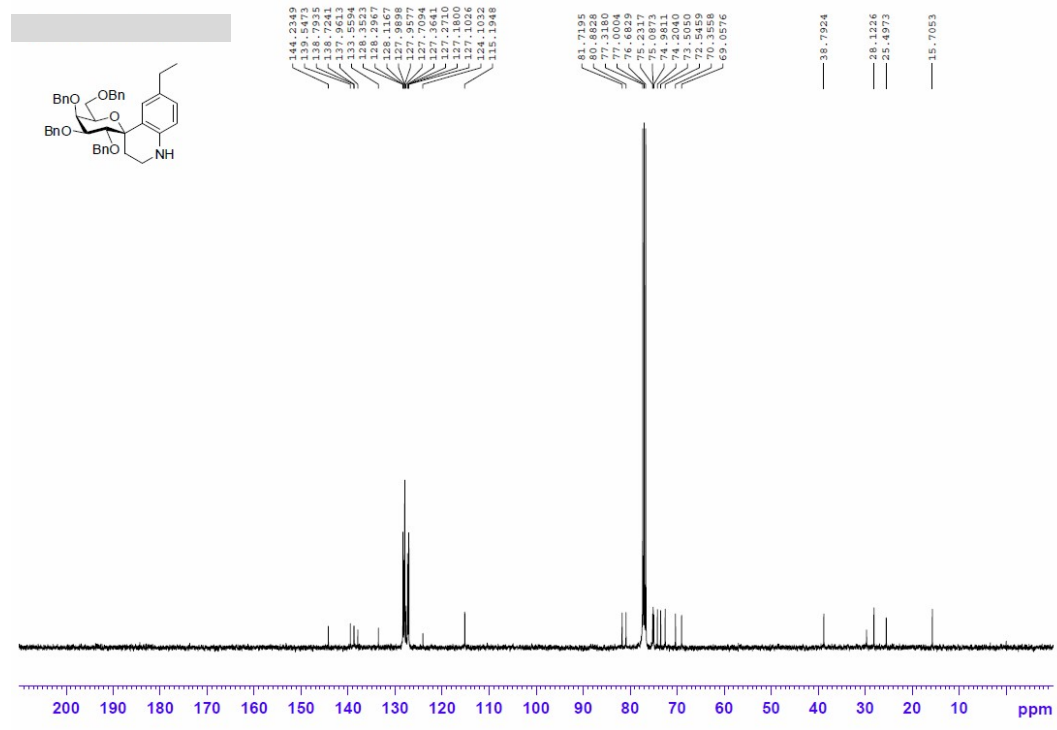

### <sup>1</sup>H NMR spectrum of 4q

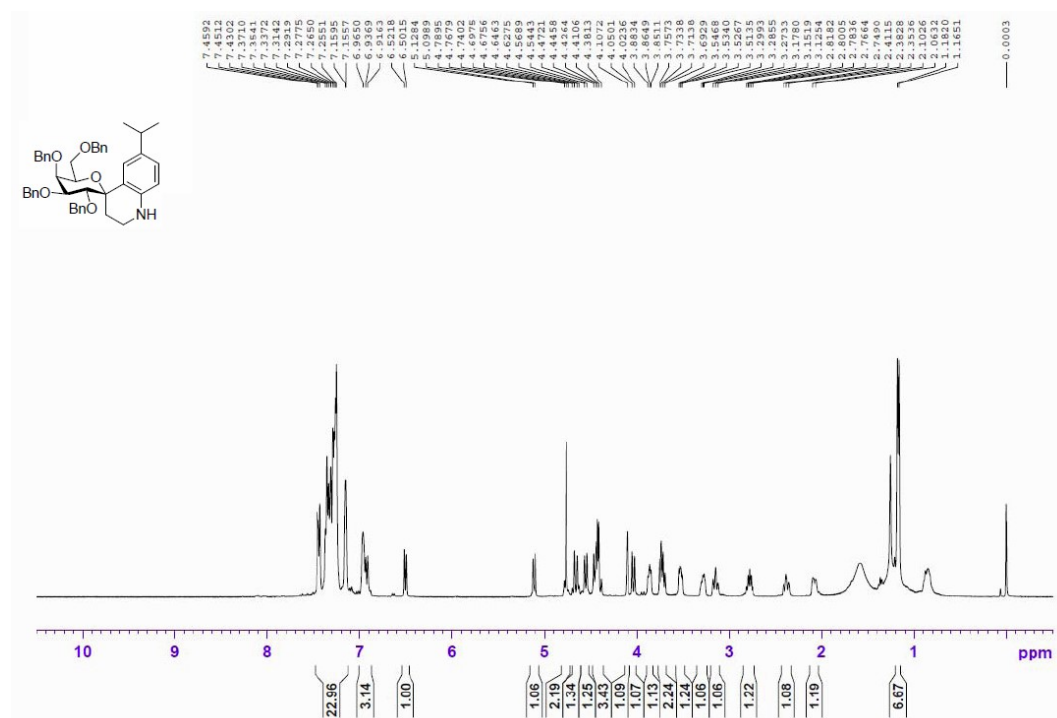

### <sup>13</sup>C NMR spectra of 4q

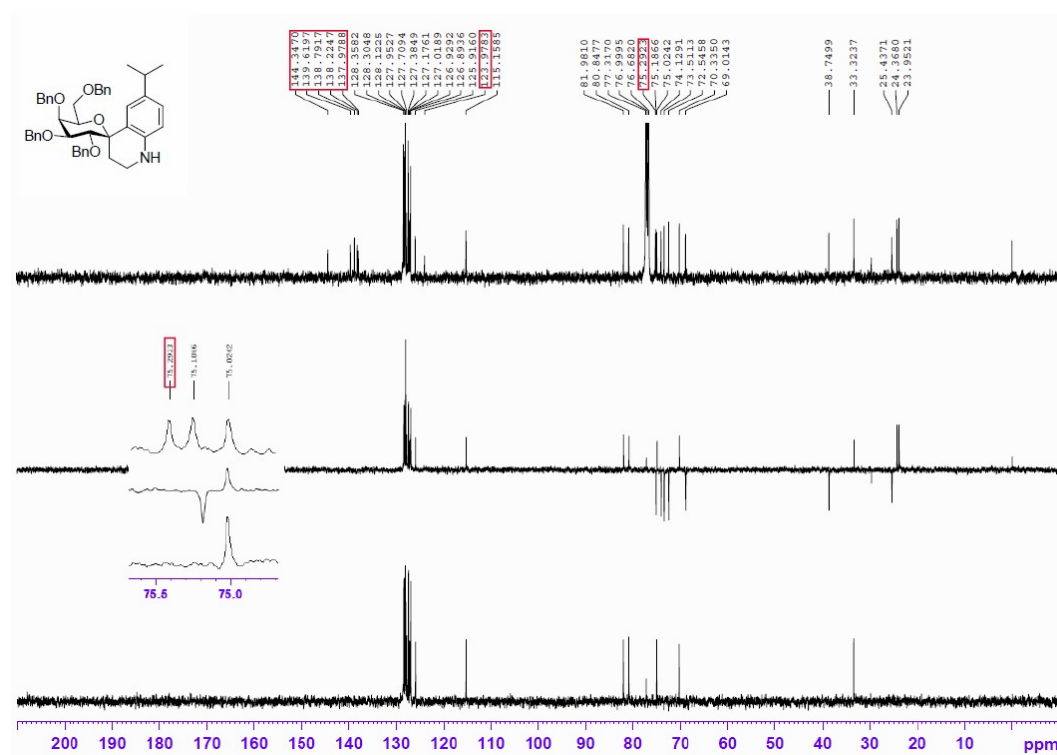

<sup>1</sup>H NMR spectrum of 4r

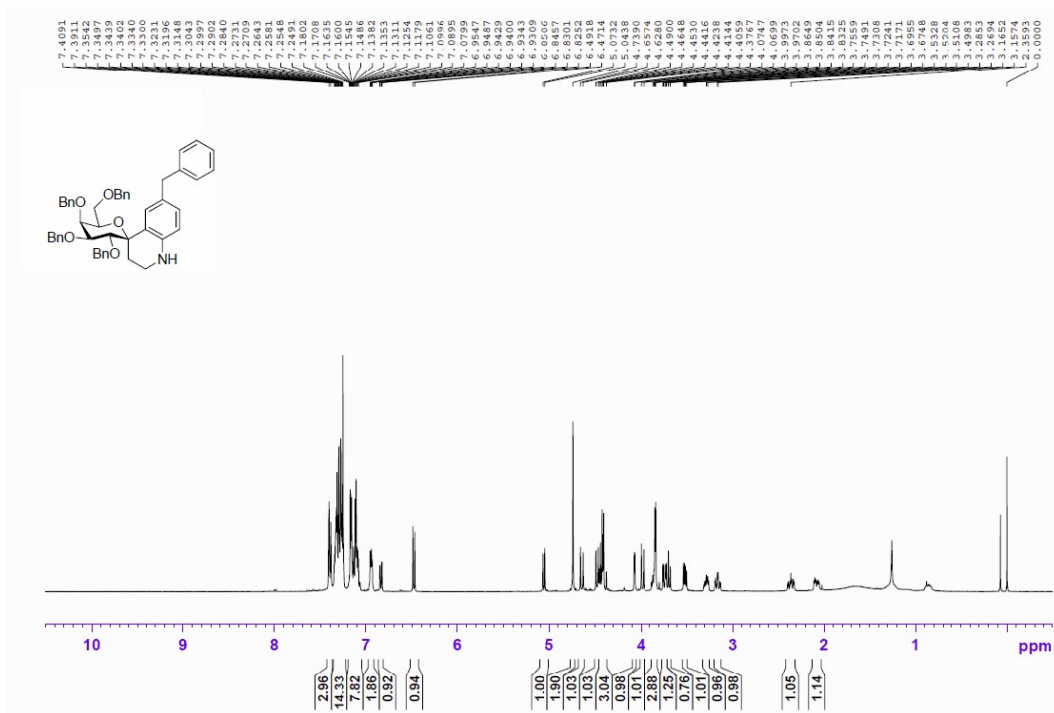

<sup>13</sup>C NMR spectra of 4r

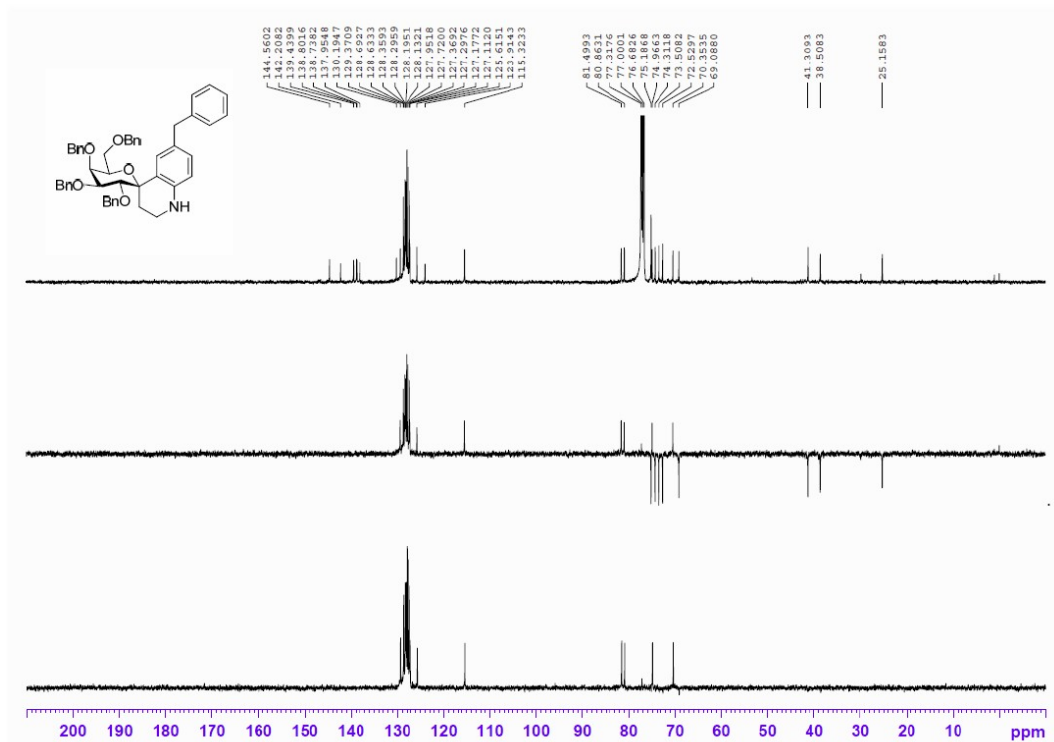

### <sup>1</sup>H NMR spectrum of 4s

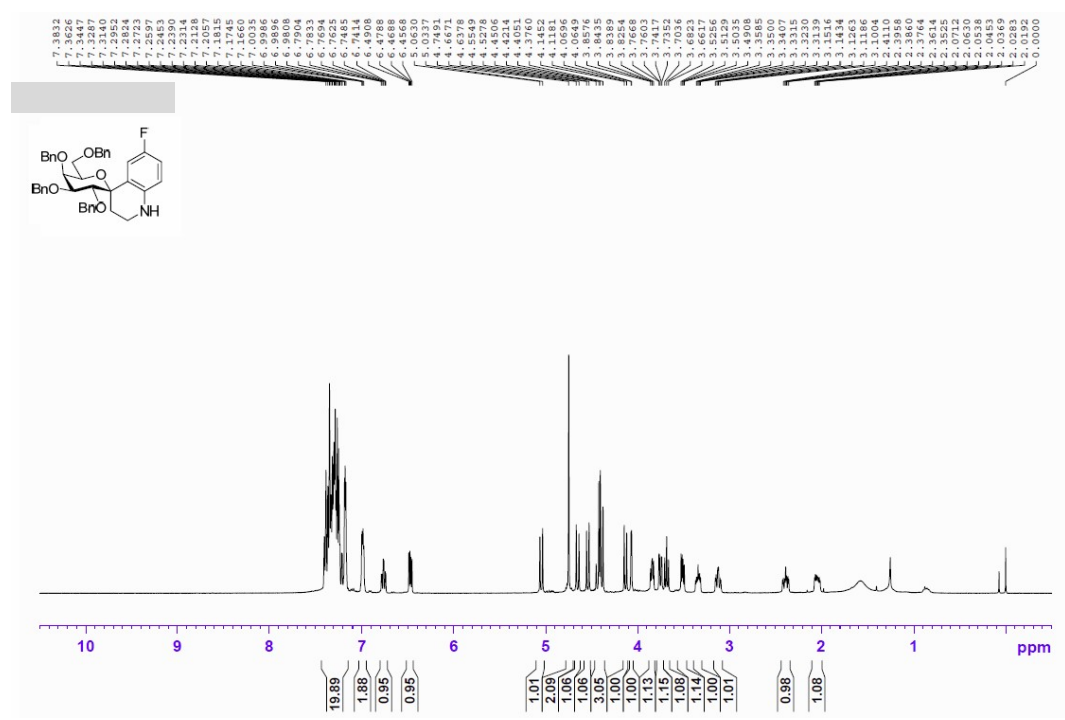

### <sup>13</sup>C NMR spectra of 4s

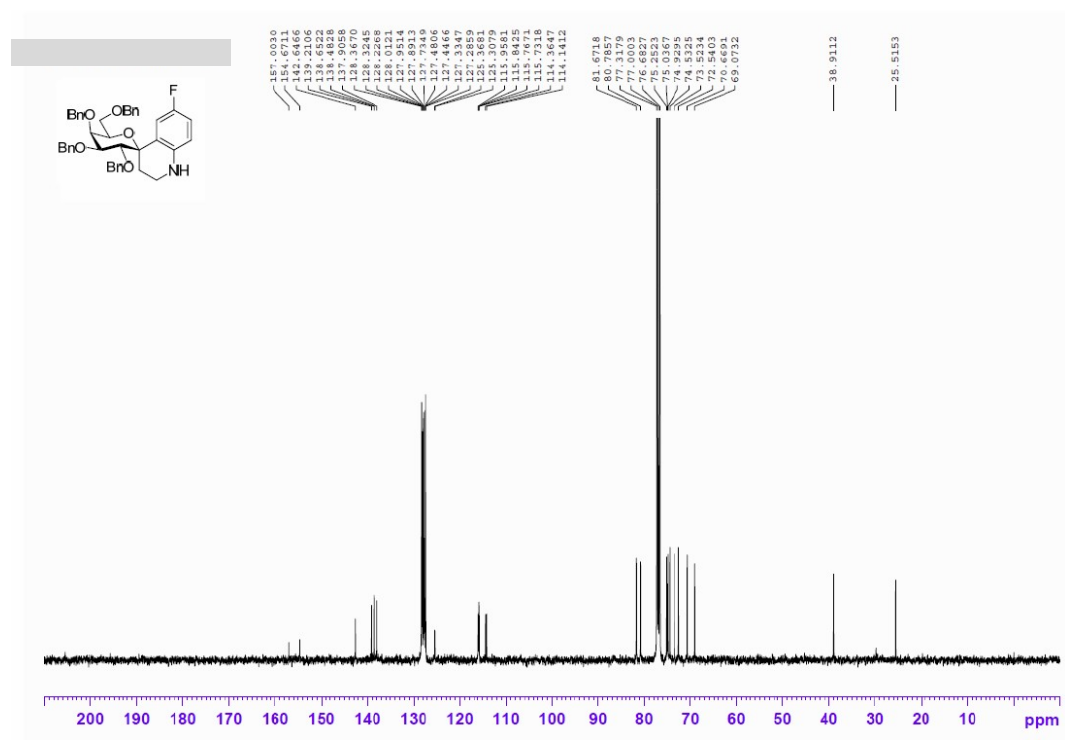

# <sup>1</sup>H NMR spectrum of 4t

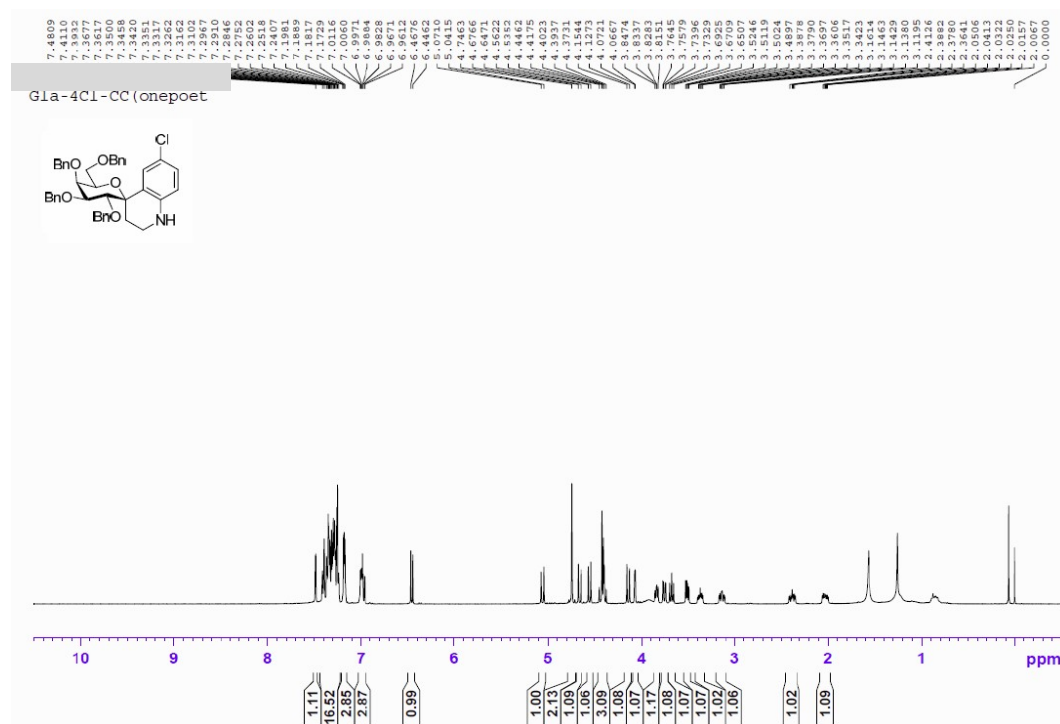

# <sup>13</sup>C NMR spectra of 4t

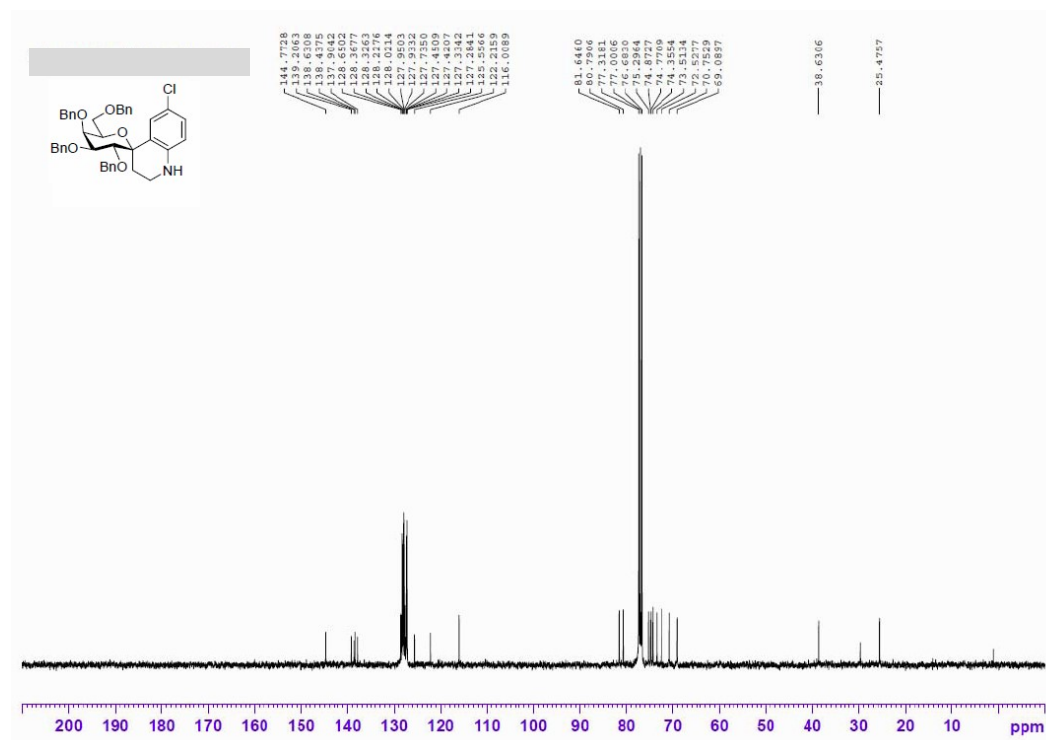





# <sup>1</sup>H NMR spectrum of 4w

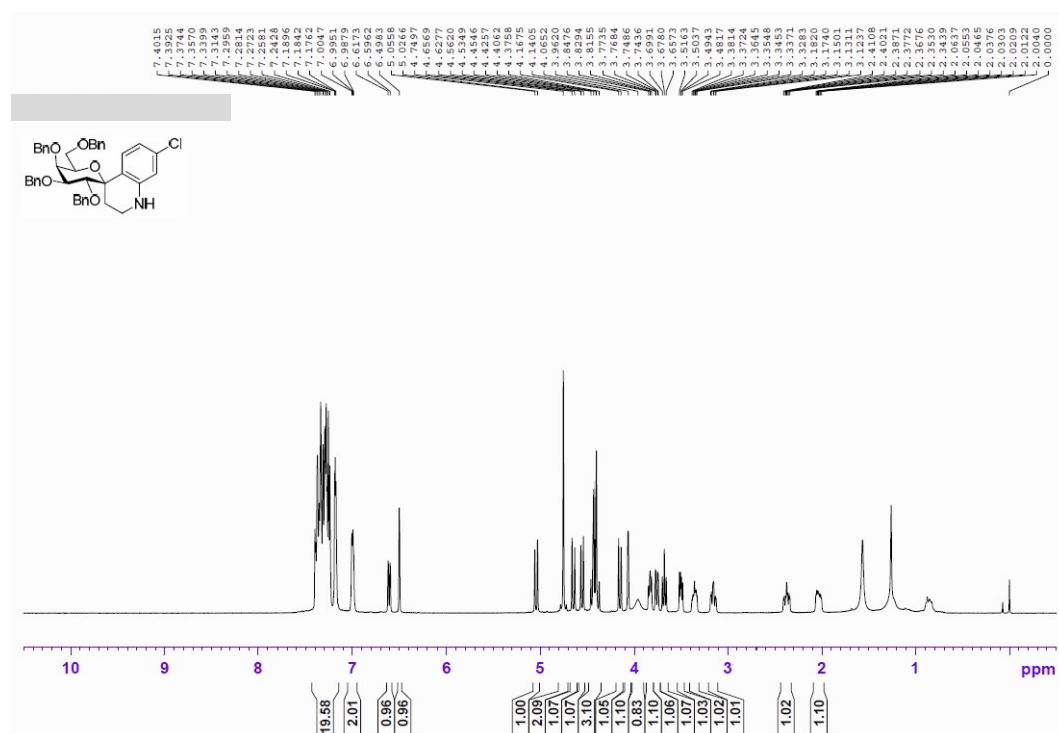

# <sup>13</sup>C NMR spectra of 4w

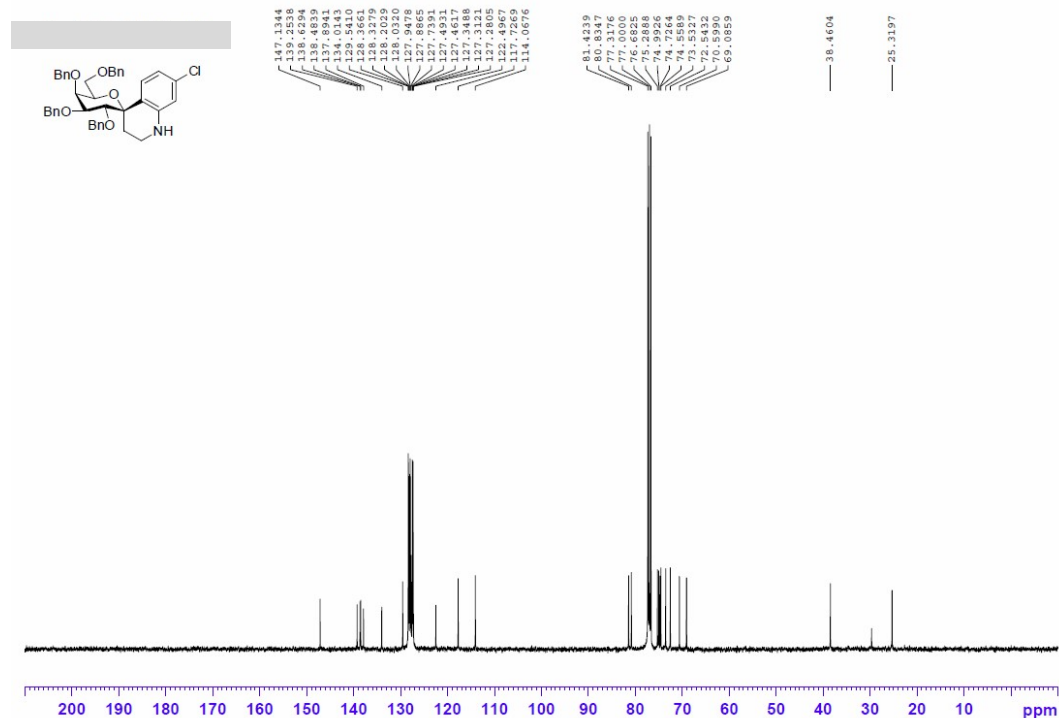

# <sup>1</sup>H NMR spectrum of 4x

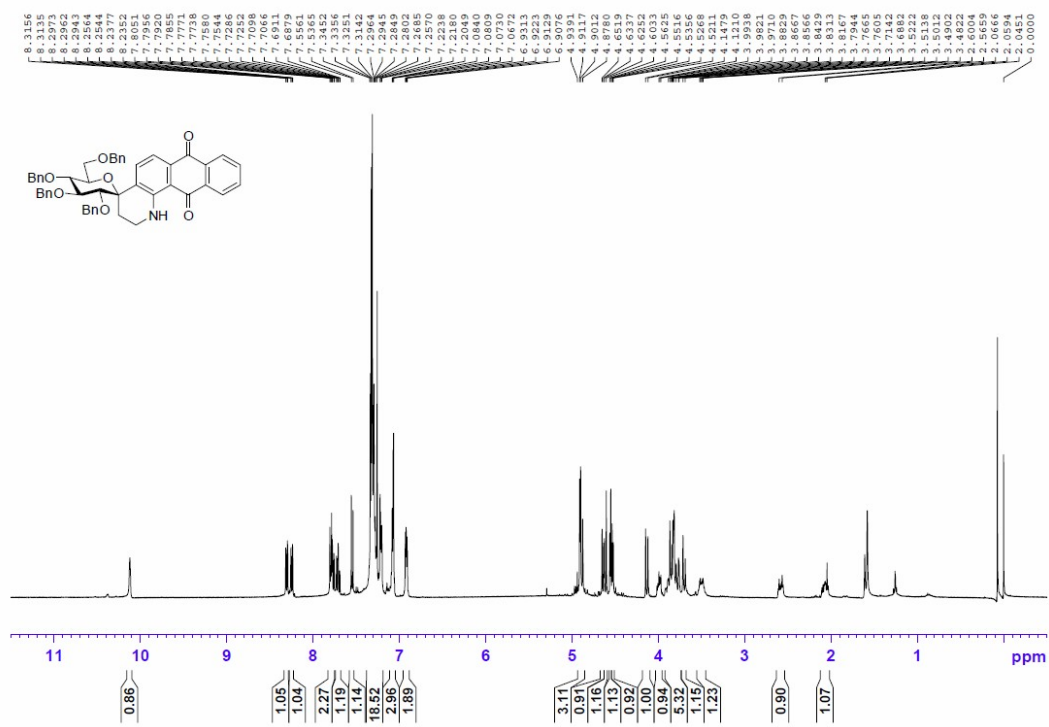

# <sup>13</sup>C NMR spectra of 4x

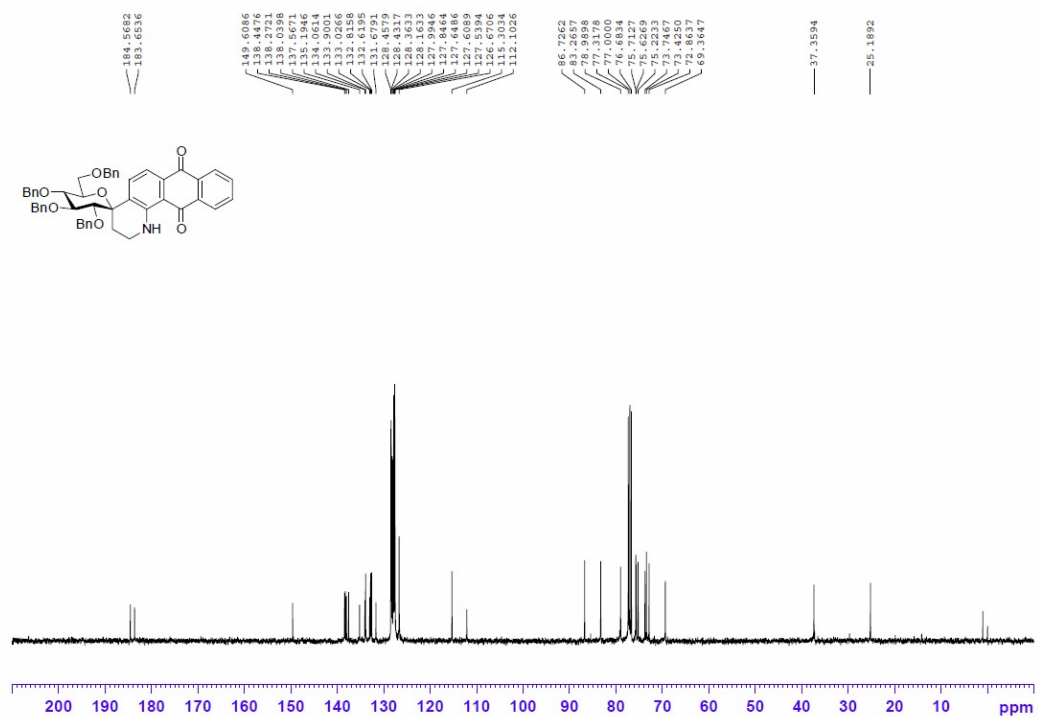



<sup>1</sup>H NMR spectrum of **5a**

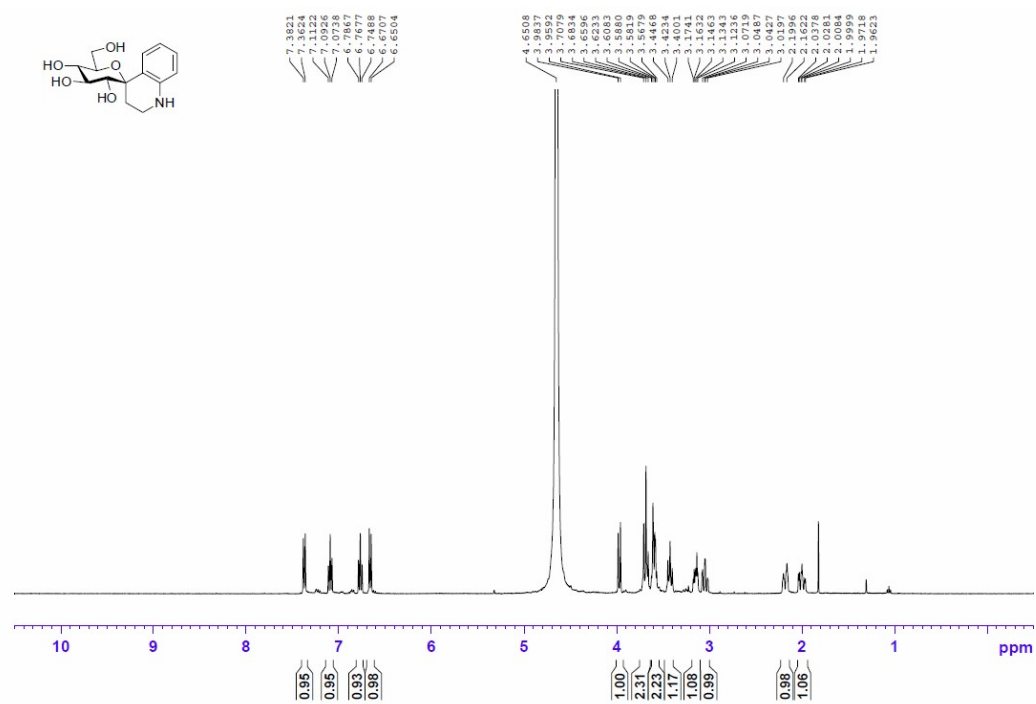

<sup>13</sup>C NMR spectra of **5a**

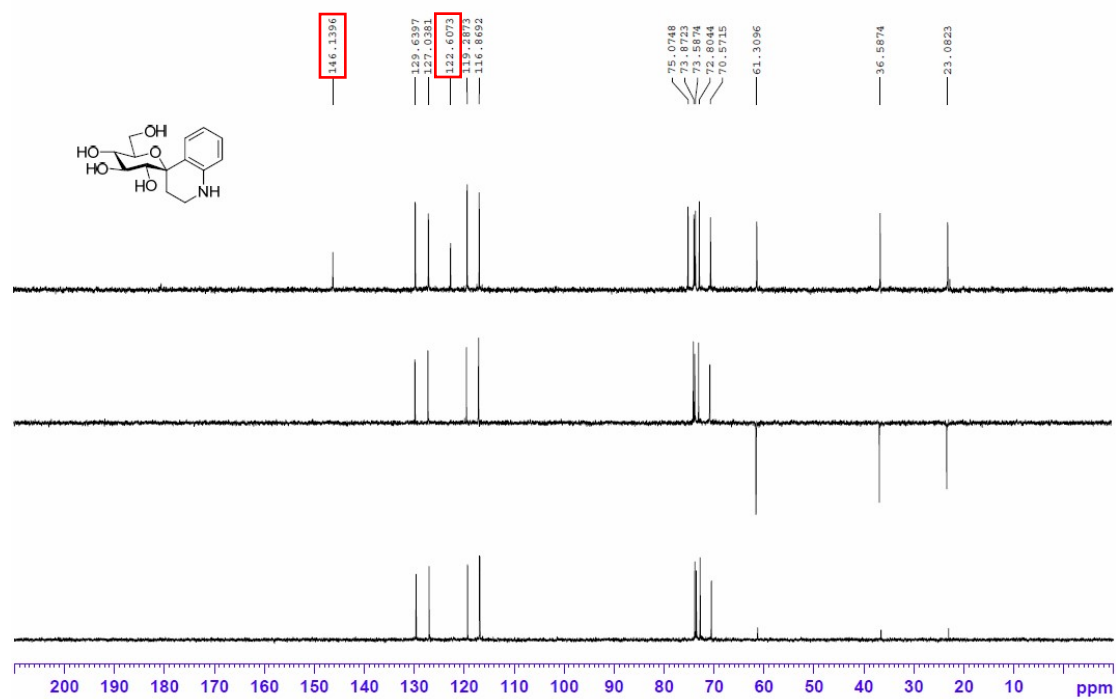



<sup>1</sup>H NMR spectrum of **5b**

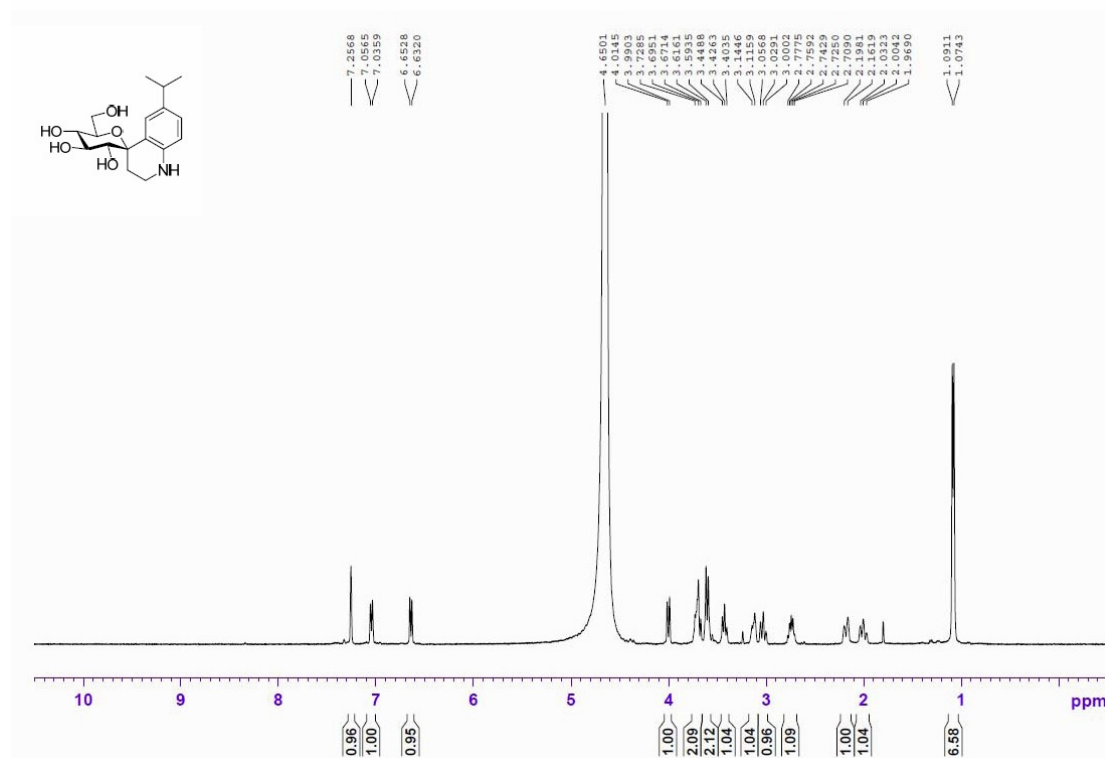

<sup>13</sup>C NMR spectra of **5b**

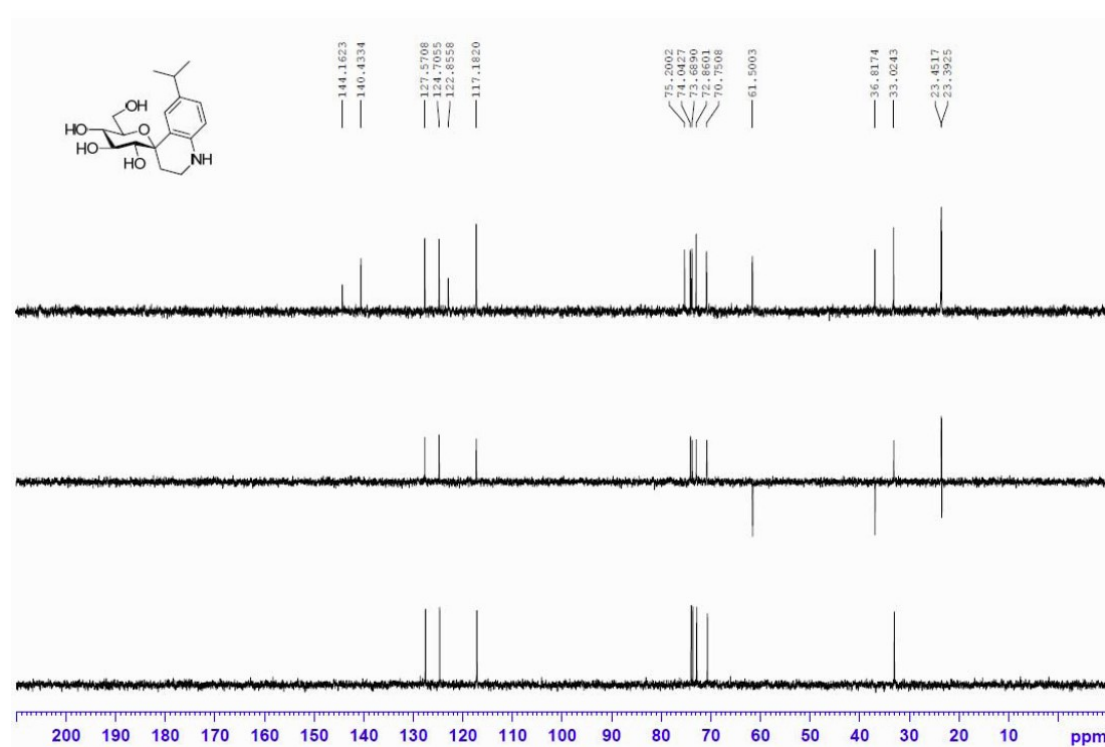

<sup>1</sup>H NMR spectrum of **5c**

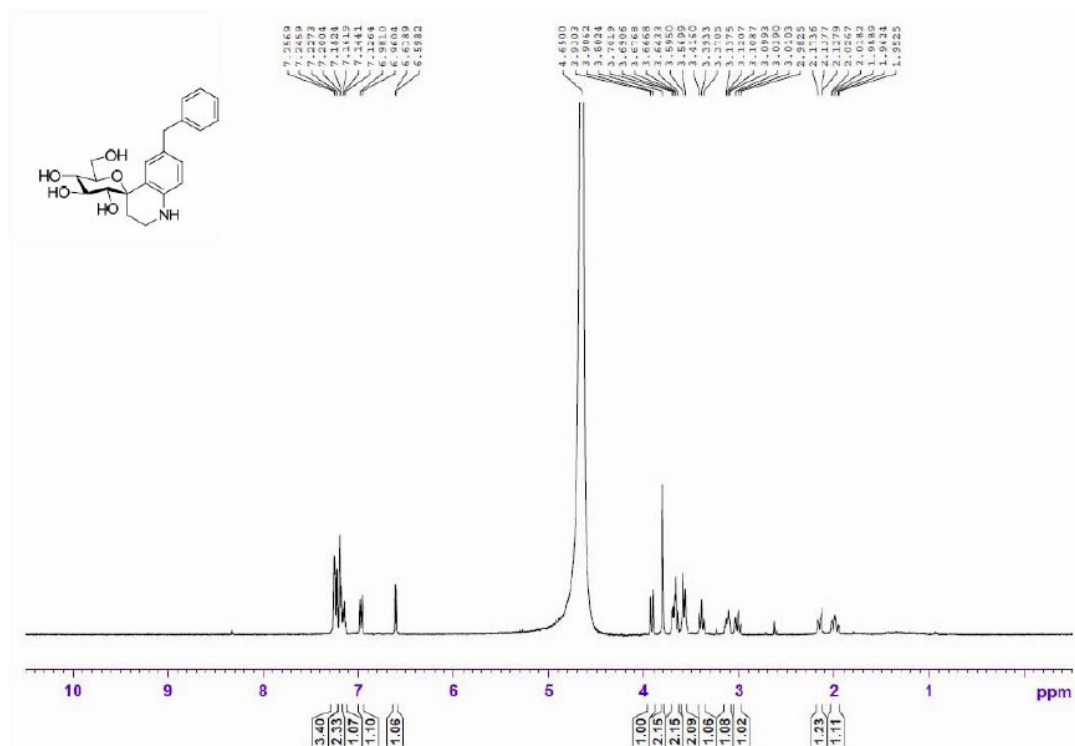

<sup>13</sup>C NMR spectra of **5c**

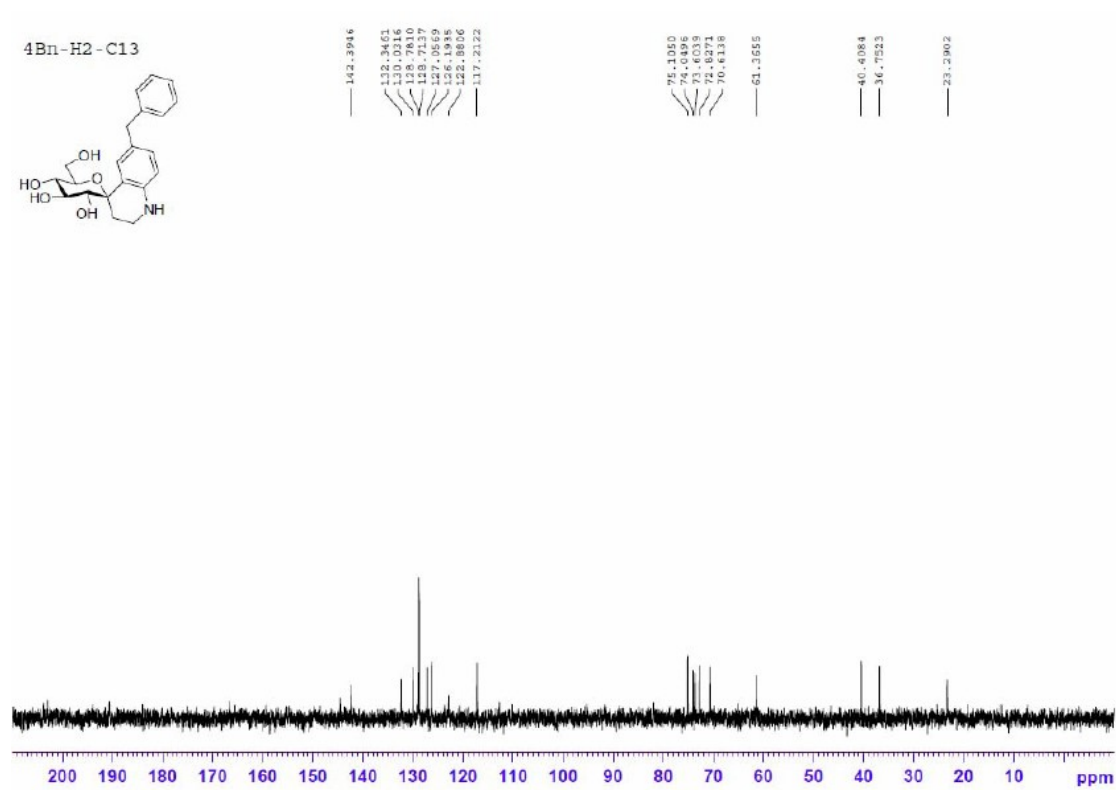

### $^1\text{H}$ NMR spectrum of **5d**

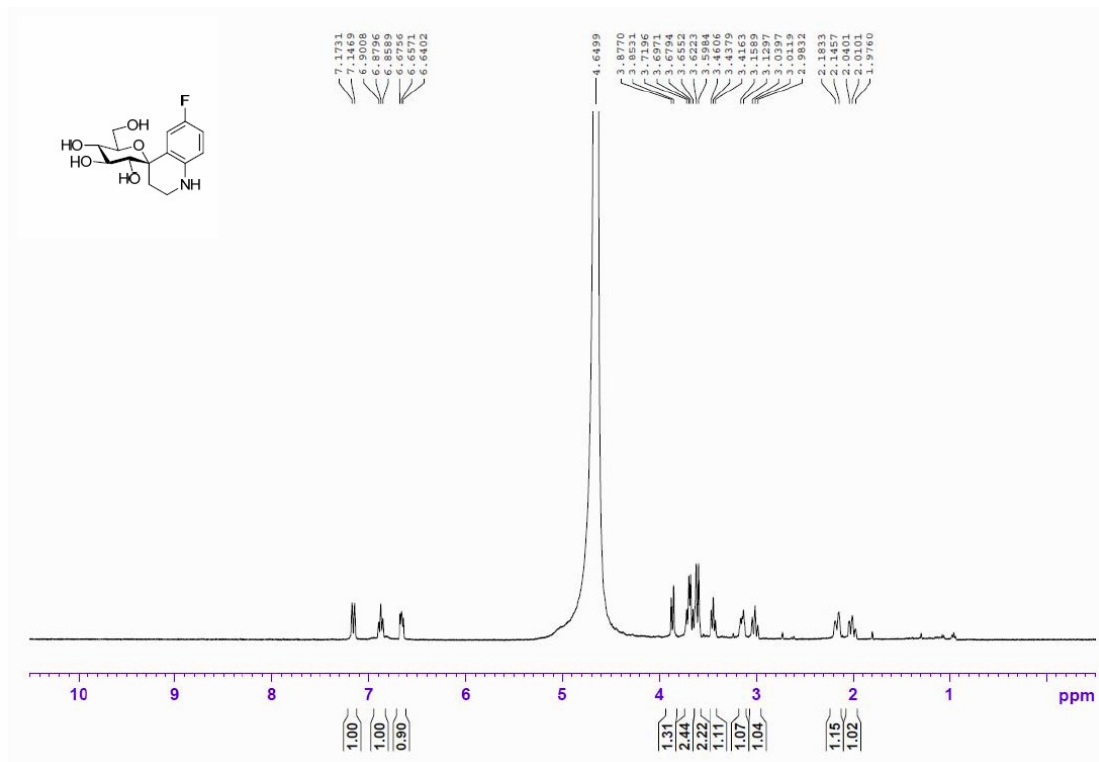

### $^{13}\text{C}$ NMR spectra of **5d**

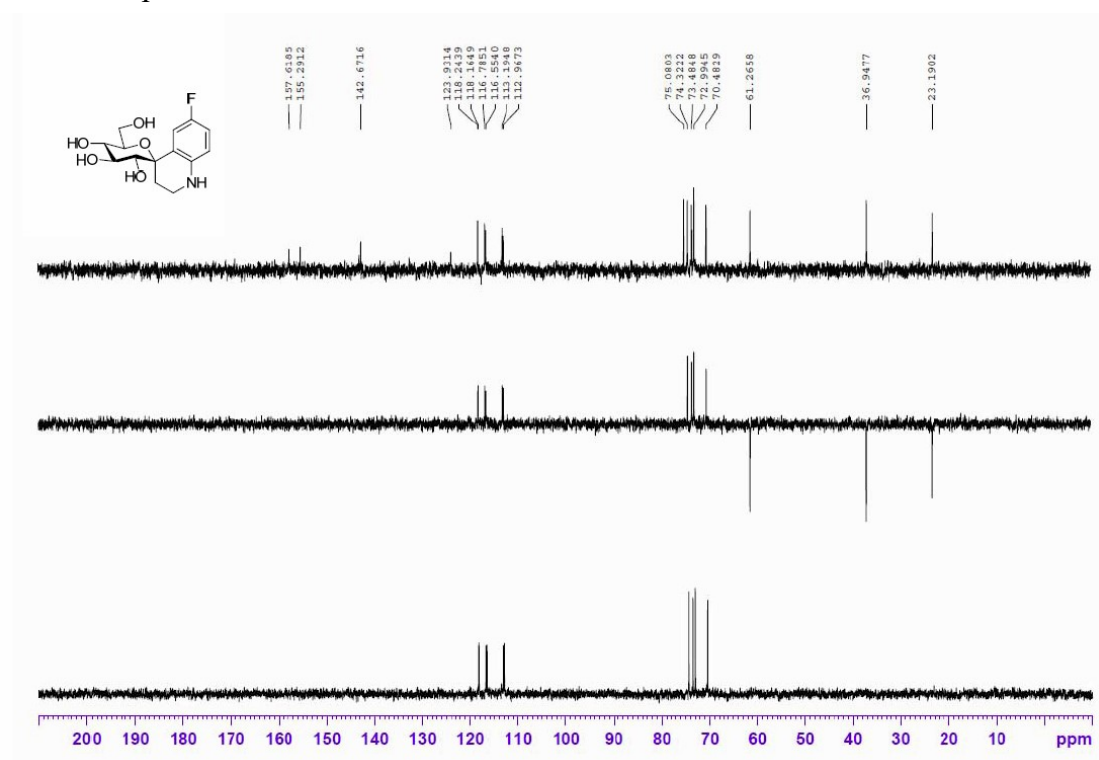

<sup>1</sup>H NMR spectrum of **5e**

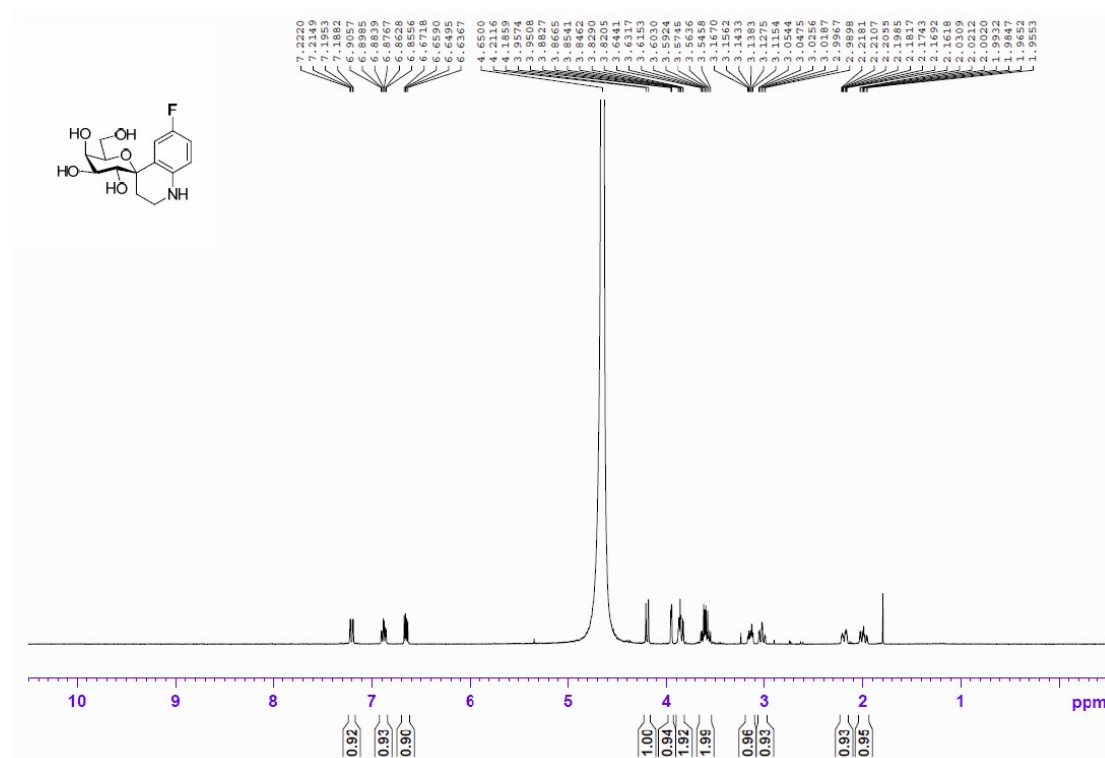

<sup>13</sup>C NMR spectra of **5e**

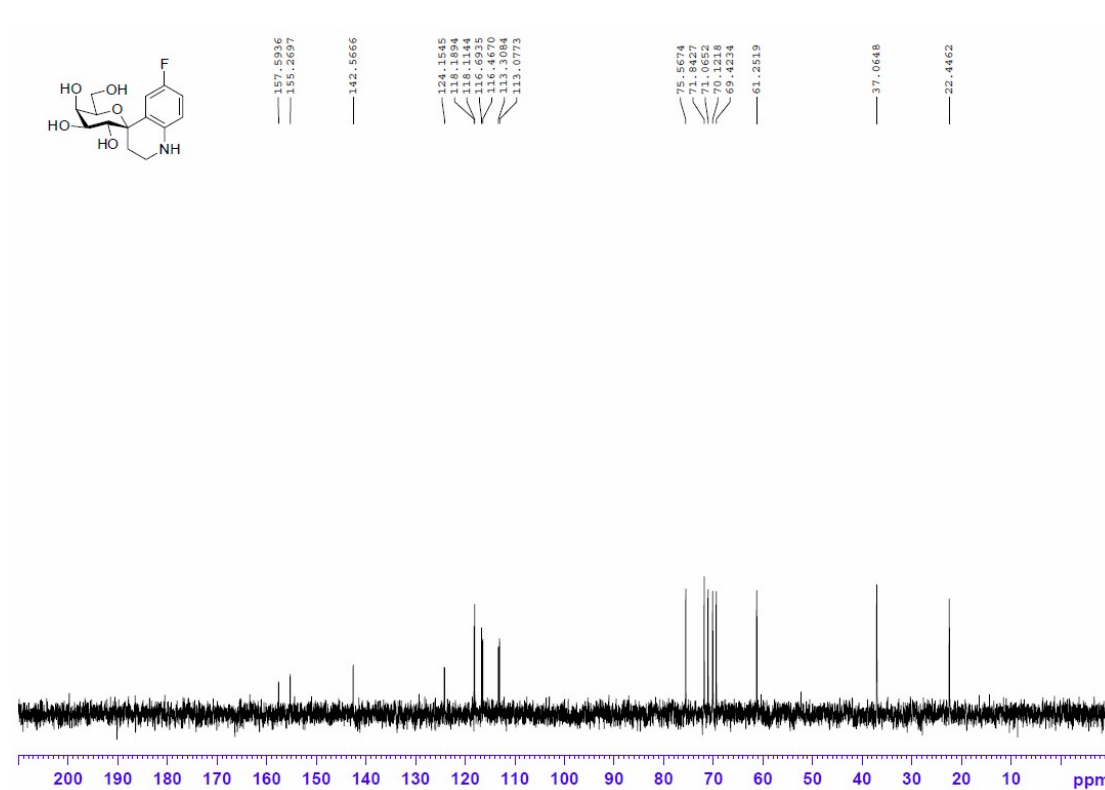

Supplement: d6ob00392c1.pdf [file d6ob00392c1.pdf]
